# Supplementary material
Source: PubMed Central journal article supplement (PMC8184022)
Supplement: NIHMS1582148-supplement-SI.pdf [file NIHMS1582148-supplement-SI.pdf]

Supporting Information for

**Masked Radicals: Iron Complexes of Trityl, Benzophenone, and  
Phenylacetylene**

*K. Cory MacLeod,<sup>‡</sup> Ida M. DiMucci,<sup>‡</sup> Edward P. Zovinka,<sup>‡</sup> Sean F. McWilliams, Brandon Q.  
Mercado, Kyle M. Lancaster,<sup>\*</sup> and Patrick L. Holland<sup>\*</sup>*

**Table of Contents**

|                                            |       |
|--------------------------------------------|-------|
| <b>Spectra</b> .....                       | S-2   |
| Mössbauer Spectra.....                     | S-2   |
| NMR Spectra.....                           | S-6   |
| UV-visible Spectra.....                    | S-10  |
| IR Spectra.....                            | S-15  |
| X-Ray Absorption Spectroscopy Details..... | S-19  |
| <b>Computations</b> .....                  | S-20  |
| Sample Input Files and Coordinates .....   | S-26  |
| <b>Crystallographic Studies</b> .....      | S-46  |
| <b>References</b> .....                    | S-195 |

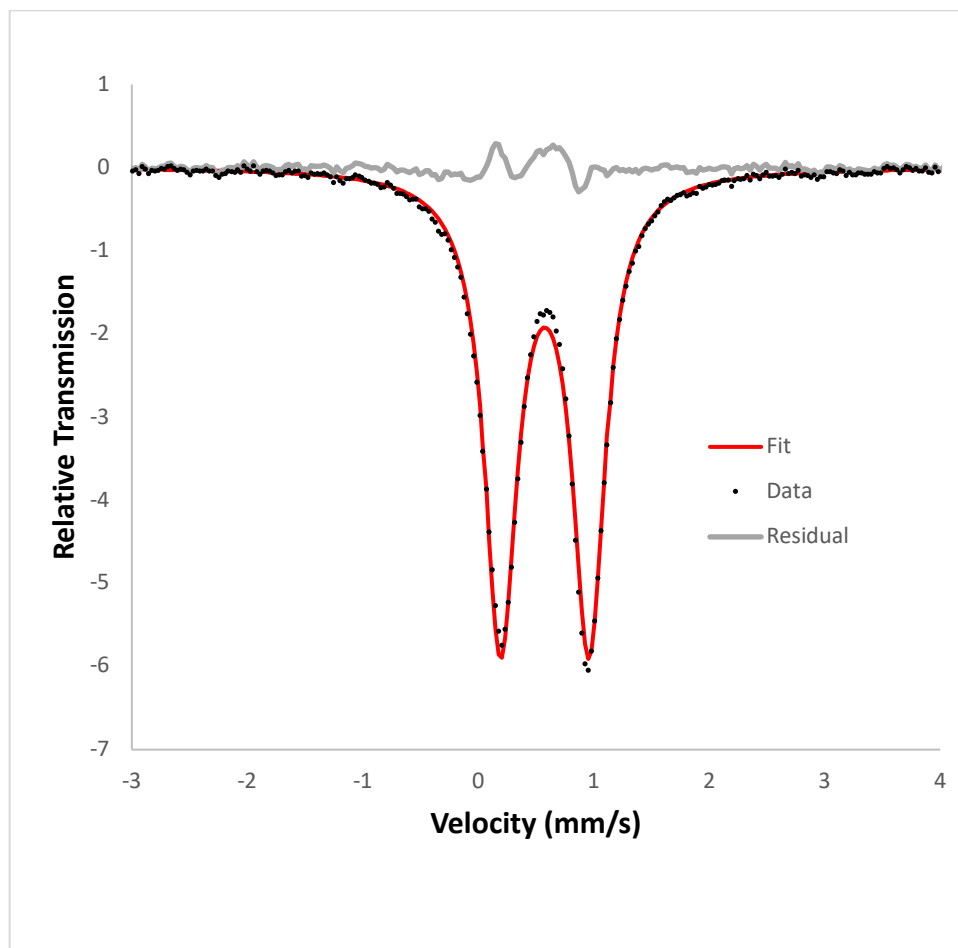

**Figure S-1.** Zero-field Mössbauer spectrum of  $L^{\text{Mc}}\text{Fe}(\text{CPh}_3)$  (**1**) recorded at 80 K. The black circles are the data, the red line is a one-component simulation of the data ( $\delta = 0.58$  mm/s,  $|\Delta E_{\text{Q}}| = 0.76$  mm/s,  $\Gamma = 0.35$  mm s $^{-1}$ ), and the gray line is the residual.

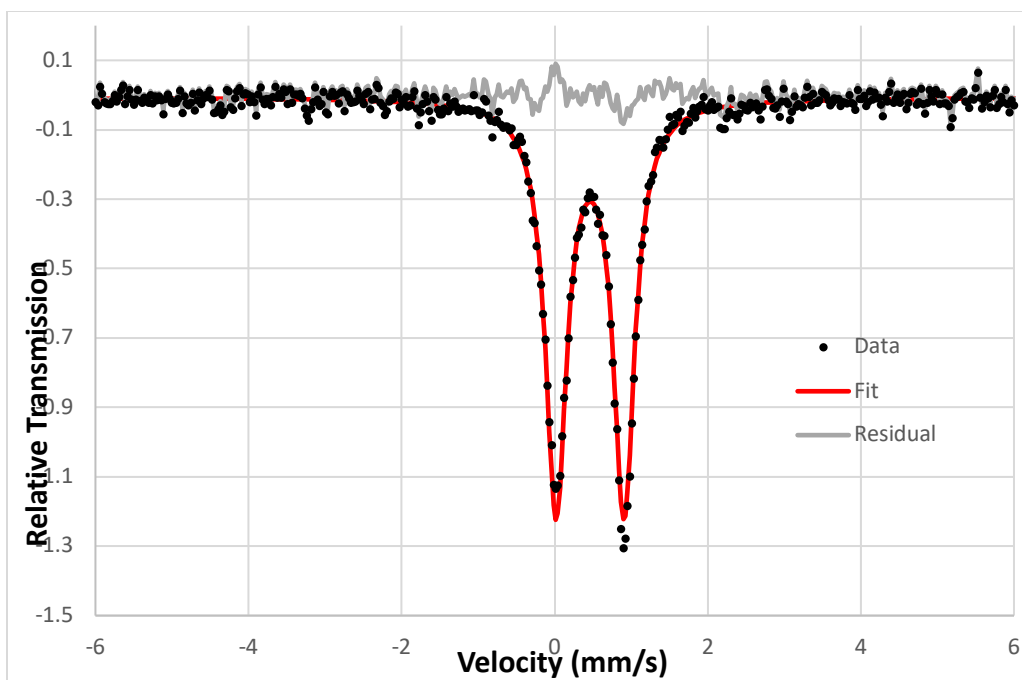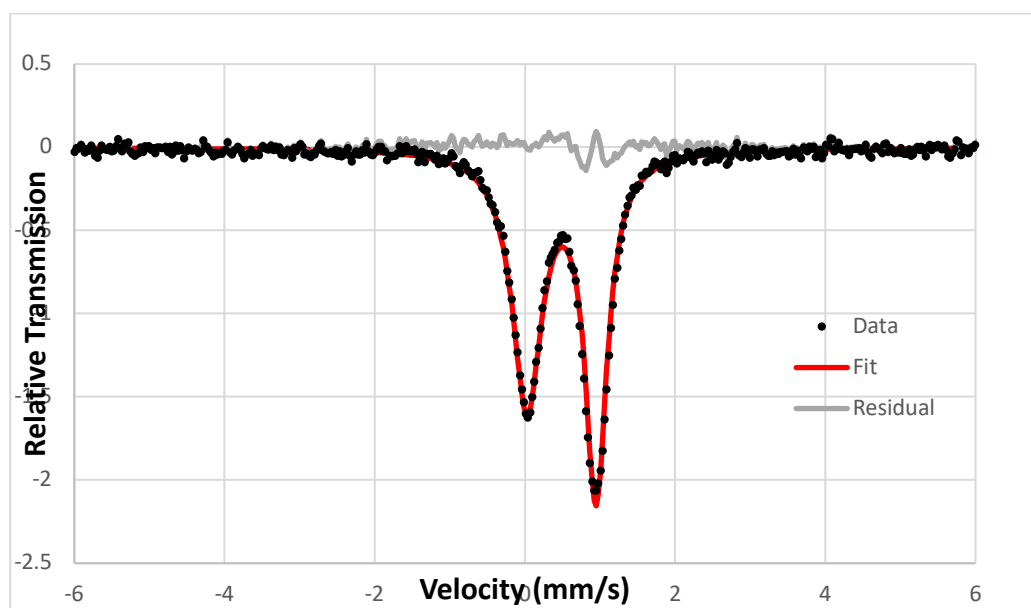

**Figure S-2.** Zero-field Mössbauer spectrum of  $L^{\text{Me}}\text{Fe}(\text{Ph}_2\text{CO})$  (**2**) recorded at (a) 223 K and (b) 173 K. The black circles are the data, the red lines are one-component simulations of the data and the gray lines are the residuals. Fit parameters: (a, 223 K)  $\delta = 0.46$  mm/s,  $|\Delta E_Q| = 0.89$  mm/s,  $\Gamma = 0.34$  mm/s; (b, 173 K)  $\delta = 0.49$  mm/s,  $|\Delta E_Q| = 0.92$  mm/s,  $\Gamma_L = 0.48$  mm/s,  $\Gamma_R = 0.36$  mm/s.

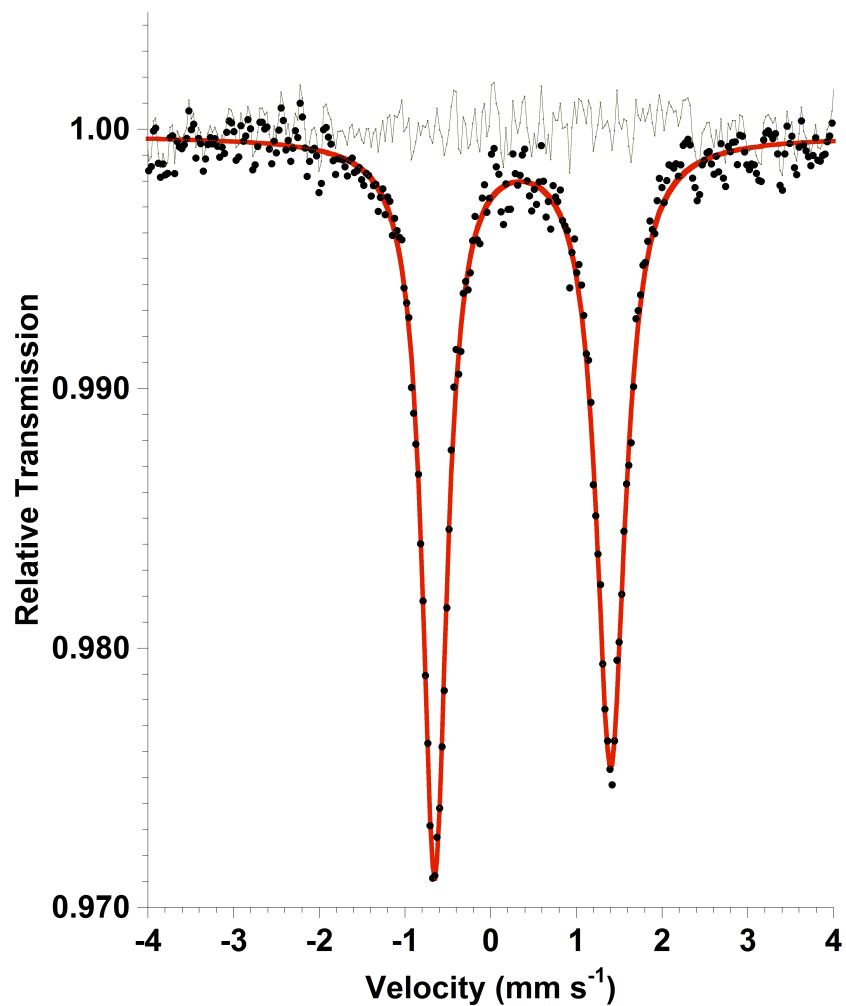

**Figure S-3.** Zero-field Mössbauer spectrum of  $[\text{K}(2.2.2\text{-cryptand})][\text{L}^{\text{Me}}\text{FeCH}_3]$  (**3**) recorded at 80 K. The black circles are the data, the red line is a one-component simulation of the data ( $\delta = 0.38$  mm/s,  $|\Delta E_{\text{Q}}| = 2.06$  mm/s,  $\Gamma_{\text{L}} = 0.35$  mm/s,  $\Gamma_{\text{R}} = 0.42$  mm/s.), and the gray line is the residual.

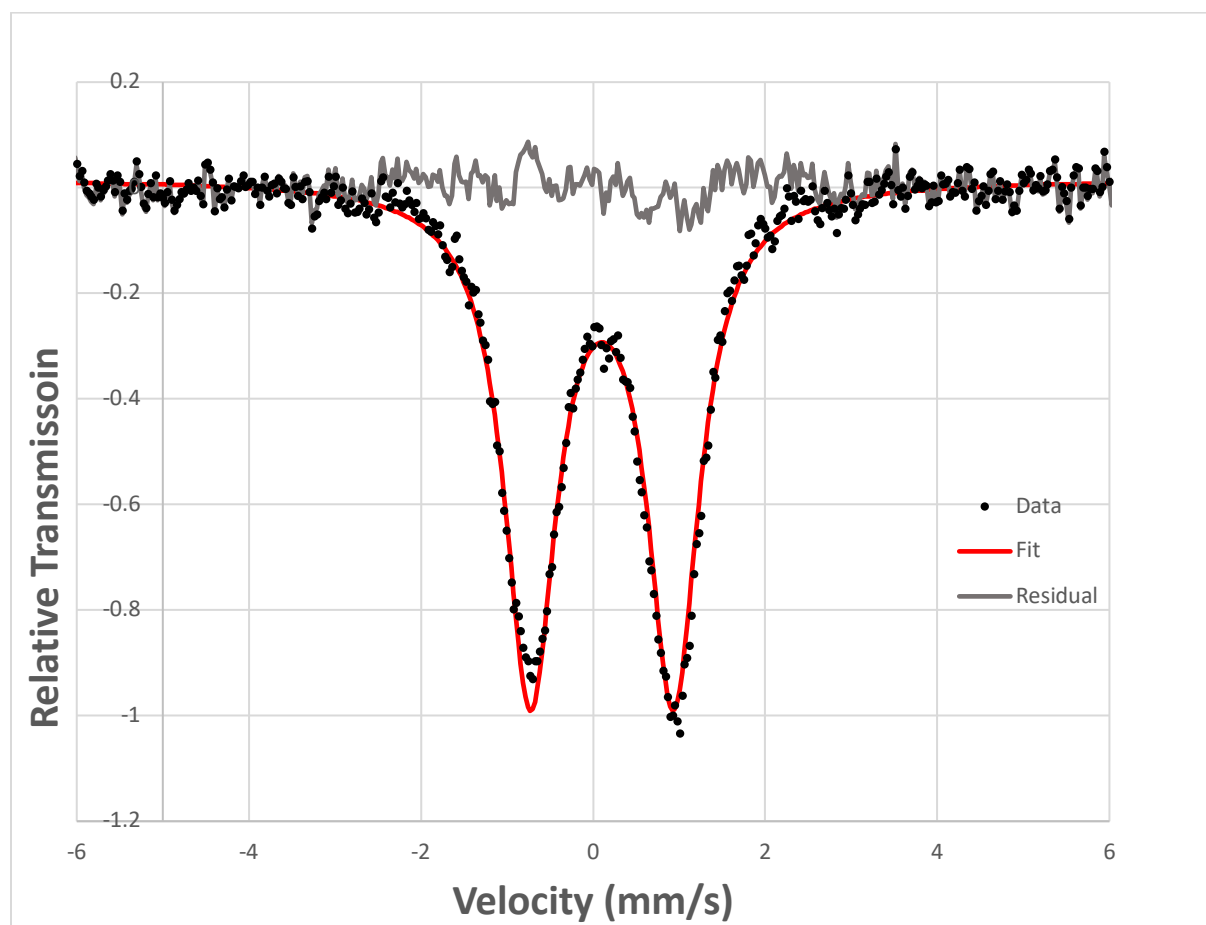

**Figure S-4.** Zero-field Mössbauer spectrum of  $L^{\text{Me}}\text{Fe}(\text{OPh}_2\text{CHCPh})$  (**6**) recorded at 173 K. The black circles are the data, the red line is a one-component simulation of the data ( $\delta = 0.10$  mm/s,  $|\Delta E_Q| = 1.66$  mm/s,  $\Gamma = 0.73$  mm/s), and the gray line is the residual.

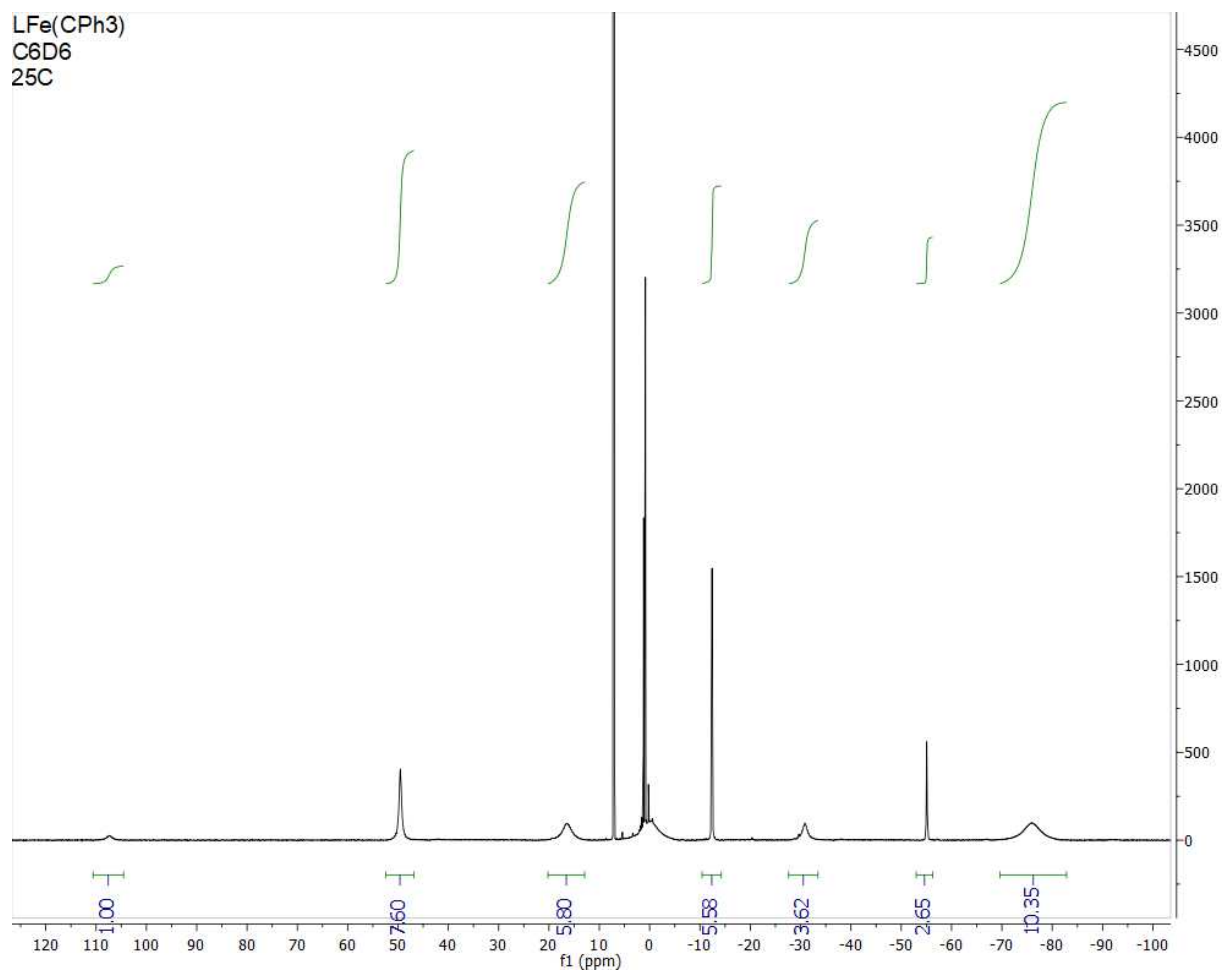

**Figure S-5:**  $^1\text{H}$  NMR spectrum of  $\text{L}^{\text{Me}}\text{Fe}(\text{CPh}_3)$  (**1**) in  $\text{C}_6\text{D}_6$ .

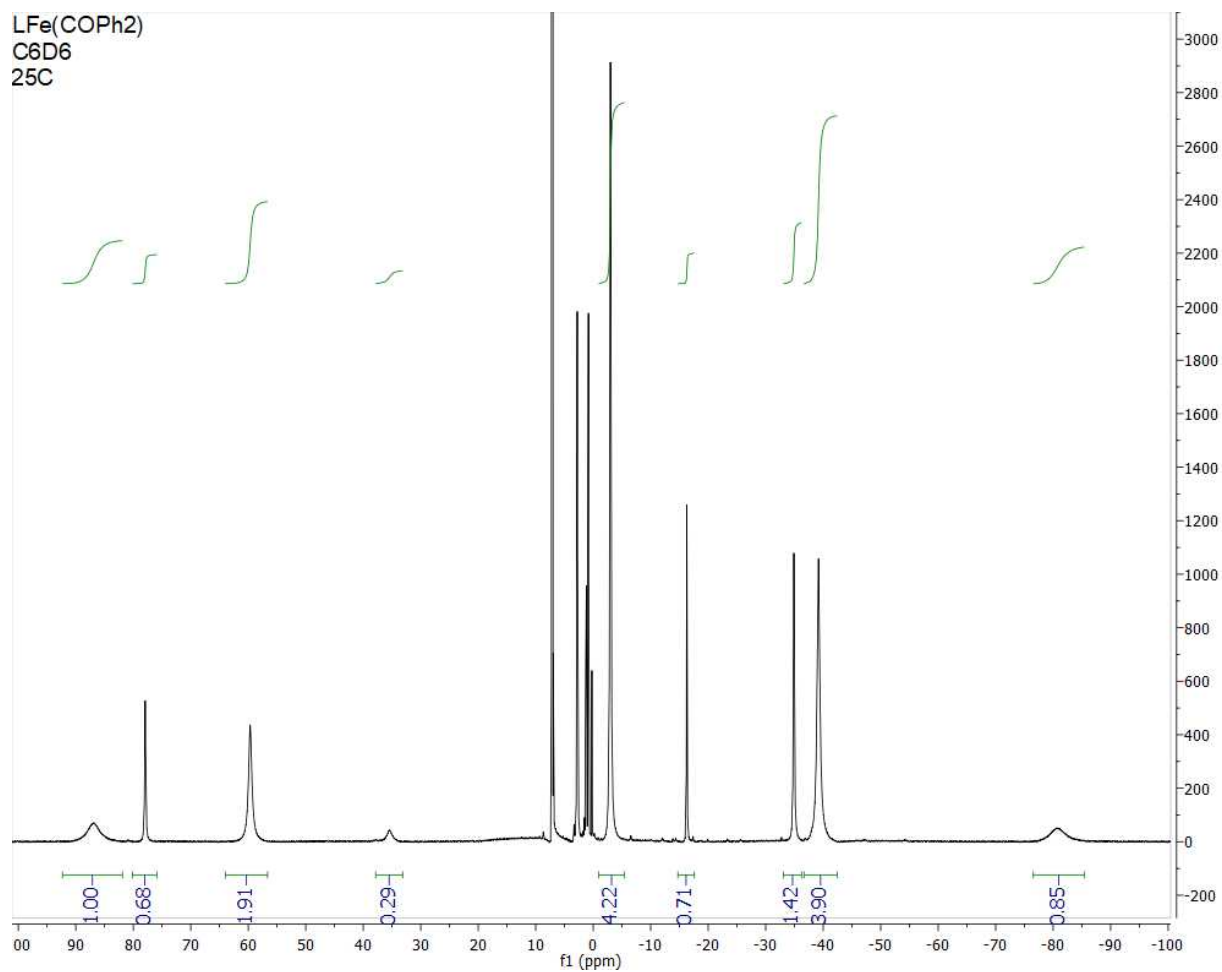

**Figure S-6:**  $^1\text{H}$  NMR spectrum of  $\text{L}^{\text{Me}}\text{Fe}(\text{Ph}_2\text{CO})$  (**2**) in  $\text{C}_6\text{D}_6$ .

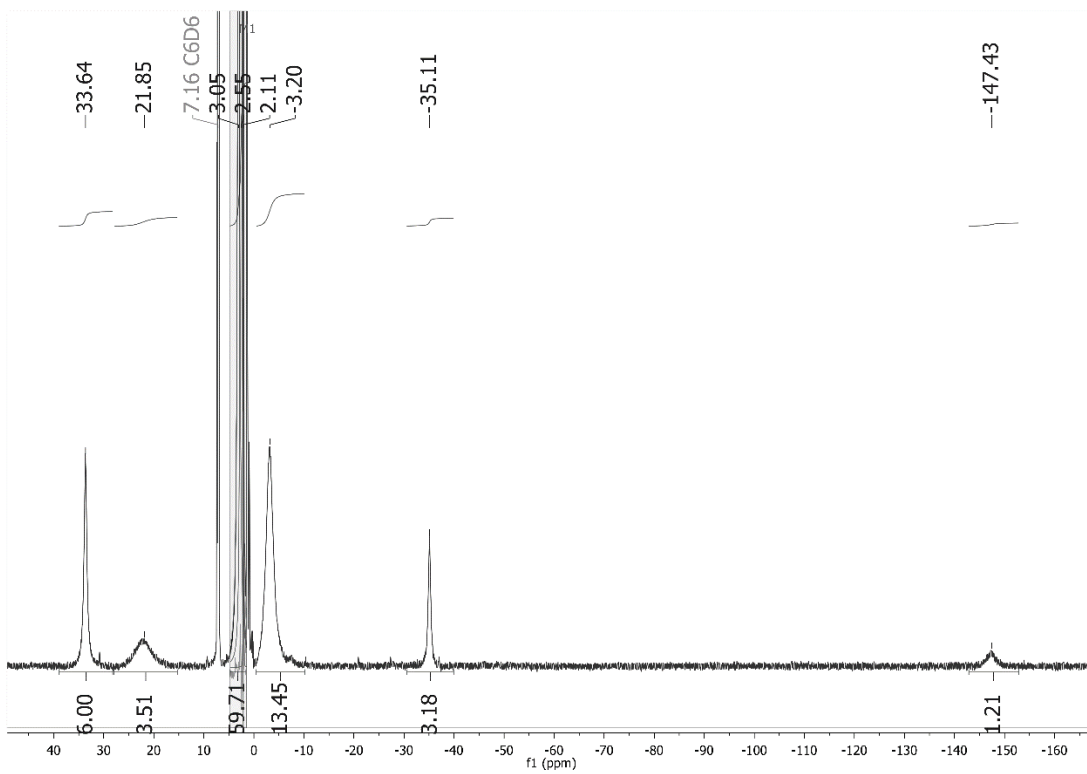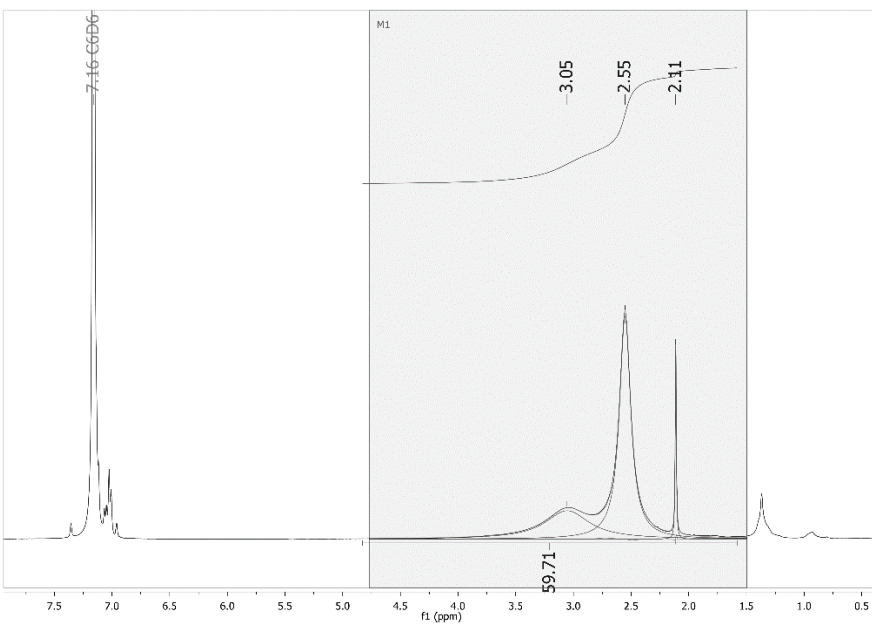

**Figure S-7:**  $^1\text{H}$  NMR spectrum of  $[\text{K}(18\text{-crown-6})][\text{L}^{\text{Me}}\text{FeCH}_3]$  (**3**) in  $\text{C}_6\text{D}_6$ : (top) full spectrum, (bottom) closeup of the region from 0 to 8 ppm.



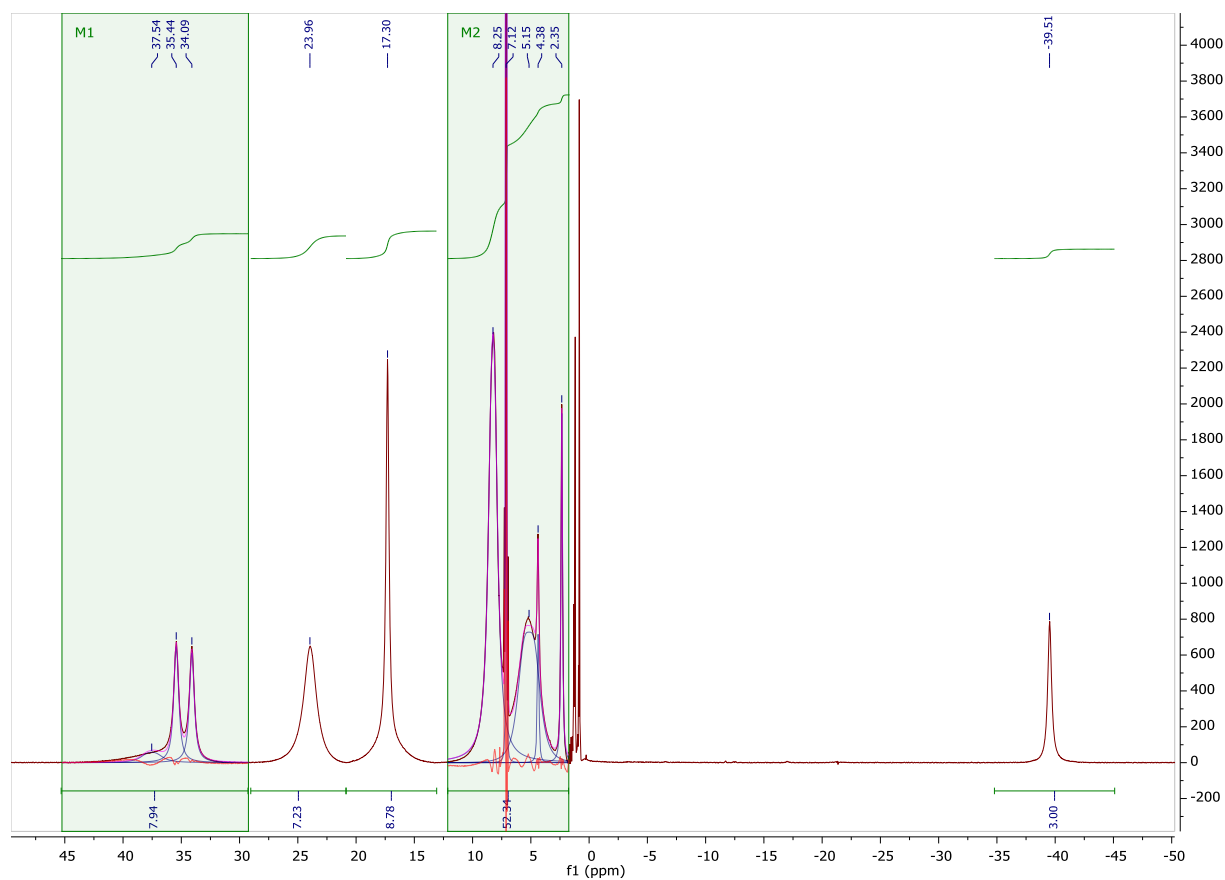

**Figure S-8:** <sup>1</sup>H NMR spectrum of L<sup>Me</sup>Fe(OCPh<sub>2</sub>CHCPh) (**6**) in C<sub>6</sub>D<sub>6</sub>. <sup>1</sup>H NMR (C<sub>6</sub>D<sub>6</sub>, 400 MHz) 37, 35, 34, 24, 17, 8, 5, 4, 2, -40 ppm. There are at least three missing or overlapping signals, which is unsurprising given the broadness of the peaks as is typical for the iron(III) oxidation state.

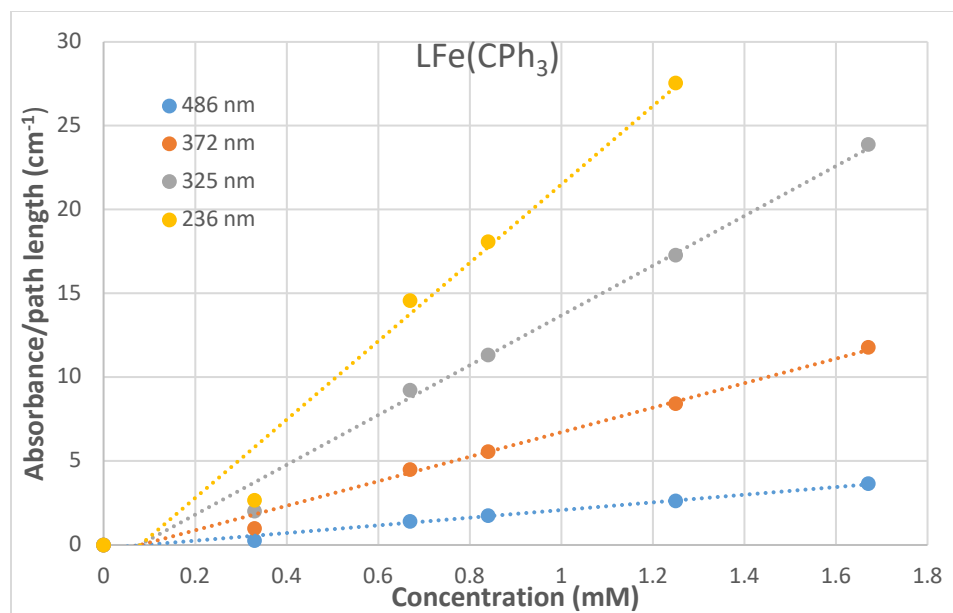

|                |                | Value      | Error    |
|----------------|----------------|------------|----------|
| Peak at 486 nm | y-int          | -0.4080    | 0.1487   |
|                | slope          | 2460.1805  | 140.2989 |
|                | R <sup>2</sup> | 0.9903     |          |
| Peak at 372 nm | y-int          | -1.1953    | 0.3945   |
|                | slope          | 7826.3101  | 372.2403 |
|                | R <sup>2</sup> | 0.9933     |          |
| Peak at 325 nm | y-int          | -2.3682    | 0.8057   |
|                | slope          | 15870.1106 | 760.3451 |
|                | R <sup>2</sup> | 0.9932     |          |
| Peak at 236 nm | y-int          | -4.89      | 2.07     |
|                | slope          | 26669.54   | 2460.74  |
|                | R <sup>2</sup> | 0.9833     |          |

**Figure S-9:** Beer-Lambert Law plot of selected UV-vis spectral features for  $L^{Me}Fe(CPh_3)$  (1) in hexanes.

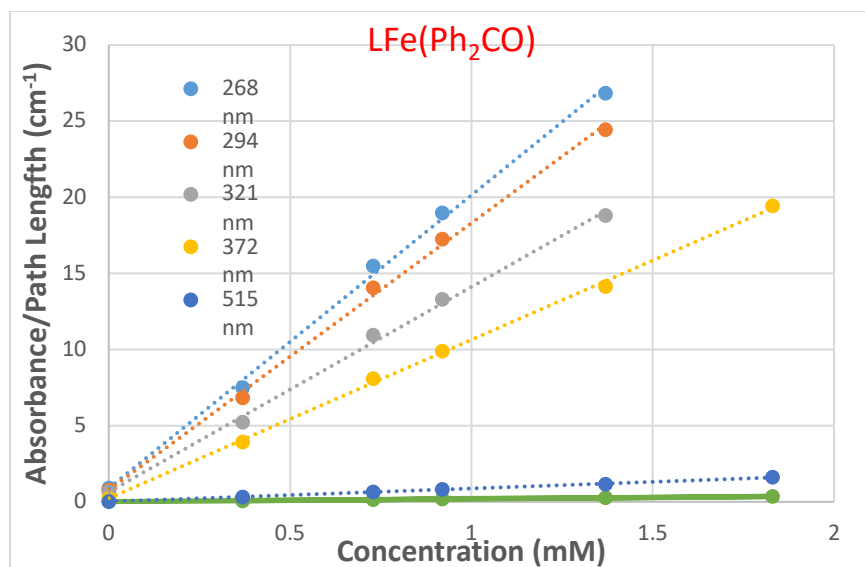

|                |                | Value    | Error    |
|----------------|----------------|----------|----------|
| Peak at 817 nm | y-int          | 0.004948 | 0.009304 |
|                | slope          | 188.4428 | 8.012423 |
|                | R <sup>2</sup> | 0.9946   |          |
| Peak at 515 nm | y-int          | 0.009976 | 0.031076 |
|                | slope          | 866.3141 | 26.76175 |
|                | R <sup>2</sup> | 0.9971   |          |
| Peak at 372 nm | y-int          | 0.227078 | 0.296108 |
|                | slope          | 10416.74 | 255.0006 |
|                | R <sup>2</sup> | 0.9982   |          |
| Peak at 321 nm | y-int          | 0.640788 | 0.653175 |
|                | slope          | 13473.72 | 709.1879 |
|                | R <sup>2</sup> | 0.9945   |          |
| Peak at 294 nm | y-int          | 0.773263 | 0.729542 |
|                | slope          | 17529.95 | 792.1041 |
|                | R <sup>2</sup> | 0.9959   |          |
| Peak at 268 nm | y-int          | 0.888233 | 0.85134  |
|                | slope          | 19248.08 | 924.3458 |
|                | R <sup>2</sup> | 0.9954   |          |

**Figure S-10:** Beer-Lambert Law plot of selected UV-vis spectral features for L<sup>Me</sup>Fe(Ph<sub>2</sub>CO) (**2**) in hexanes solutions.

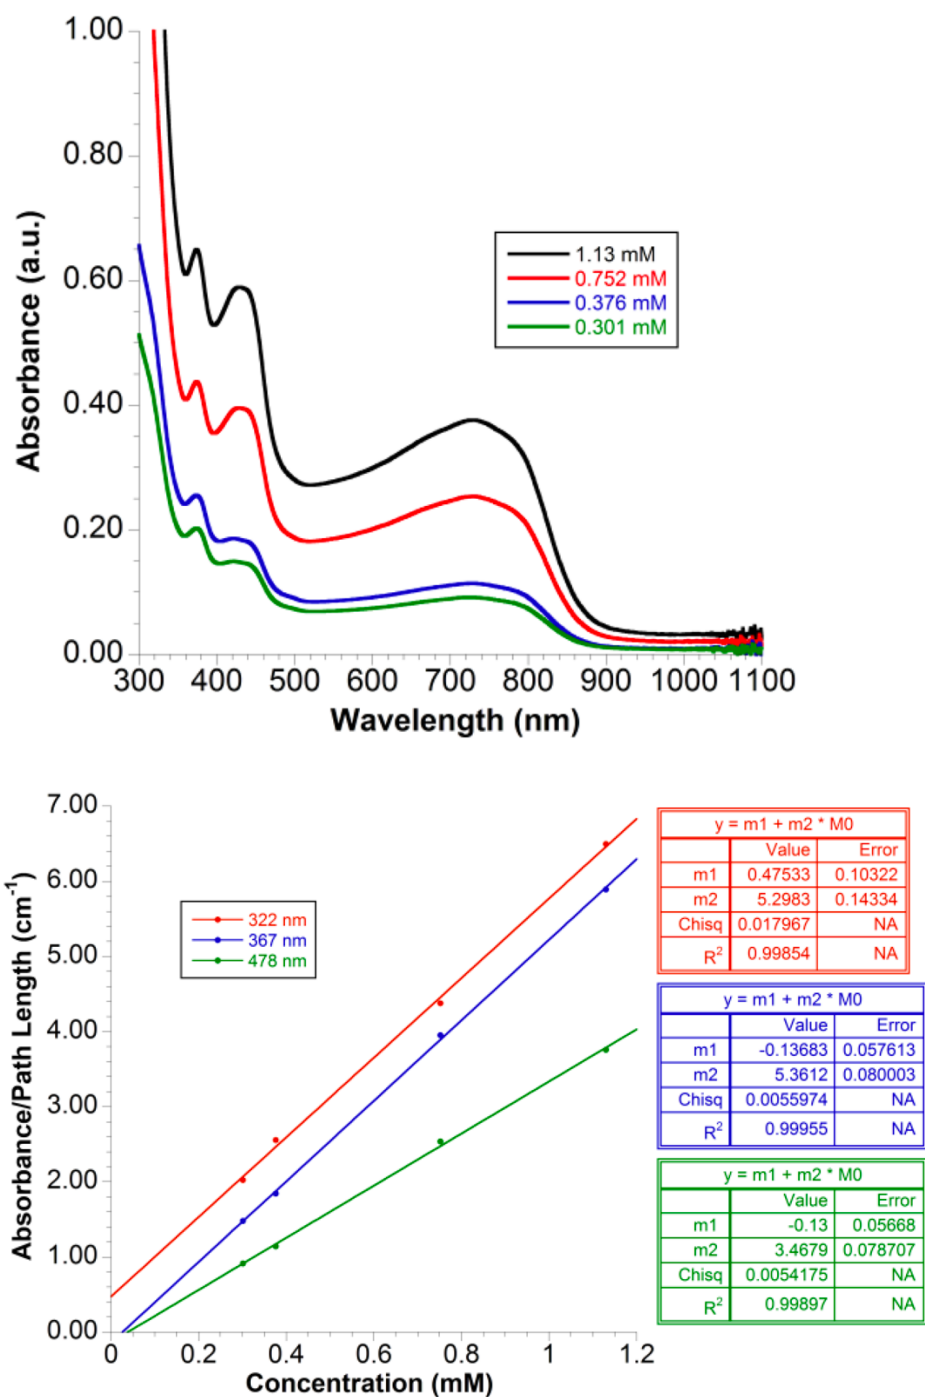

Figure S-11: UV-vis spectra and Beer-Lambert Law plot of [K(18-crown-6)][L<sup>Me</sup>FeCH<sub>3</sub>] (**3**).

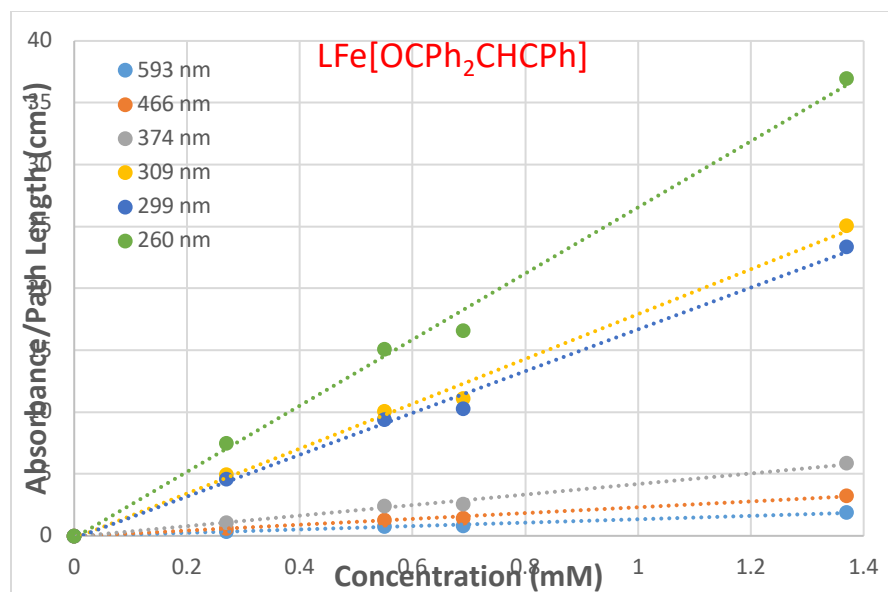

|                |                | Value   | Error   |
|----------------|----------------|---------|---------|
| Peak at 593 nm | y-int          | -0.0310 | 0.04551 |
|                | slope          | 1.3712  | 0.06161 |
|                | R <sup>2</sup> | 0.9940  |         |
| Peak at 466 nm | y-int          | -0.0435 | 0.07676 |
|                | slope          | 2.3544  | 0.10392 |
|                | R <sup>2</sup> | 0.9942  |         |
| Peak at 374 nm | y-int          | -0.0668 | 0.14701 |
|                | slope          | 4.25707 | 0.19901 |
|                | R <sup>2</sup> | 0.9935  |         |
| Peak at 309 nm | y-int          | -0.2043 | 0.56737 |
|                | slope          | 18.1270 | 0.76806 |
|                | R <sup>2</sup> | 0.9946  |         |
| Peak at 299 nm | y-int          | -0.2057 | 0.53804 |
|                | slope          | 16.8942 | 0.72836 |
|                | R <sup>2</sup> | 0.9945  |         |
| Peak at 260 nm | y-int          | -0.1679 | 0.7940  |
|                | slope          | 26.7166 | 1.0748  |
|                | R <sup>2</sup> | 0.9952  |         |

**Figure S-12:** Beer-Lambert Law plot of selected UV-vis spectral features for  $L^{Me}Fe(OCPh_2CHCPh)$  (**6**) in hexanes.

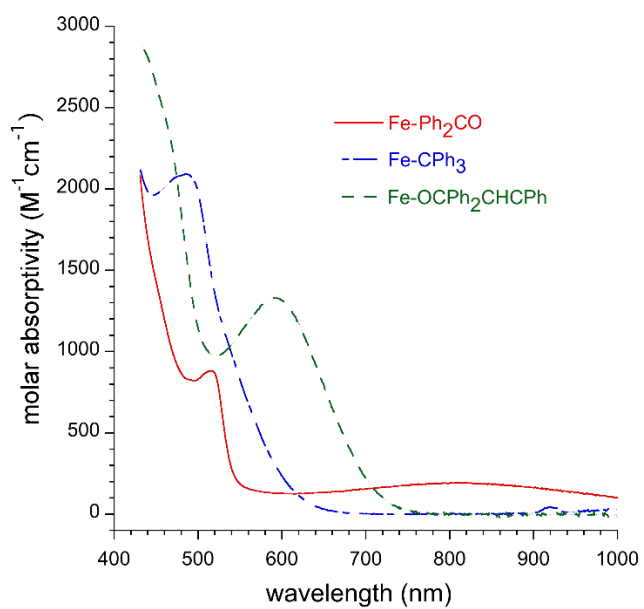

**Figure S-13.** Overlaid UV-vis spectra of **1** (blue), **2** (red), and **6** (green).

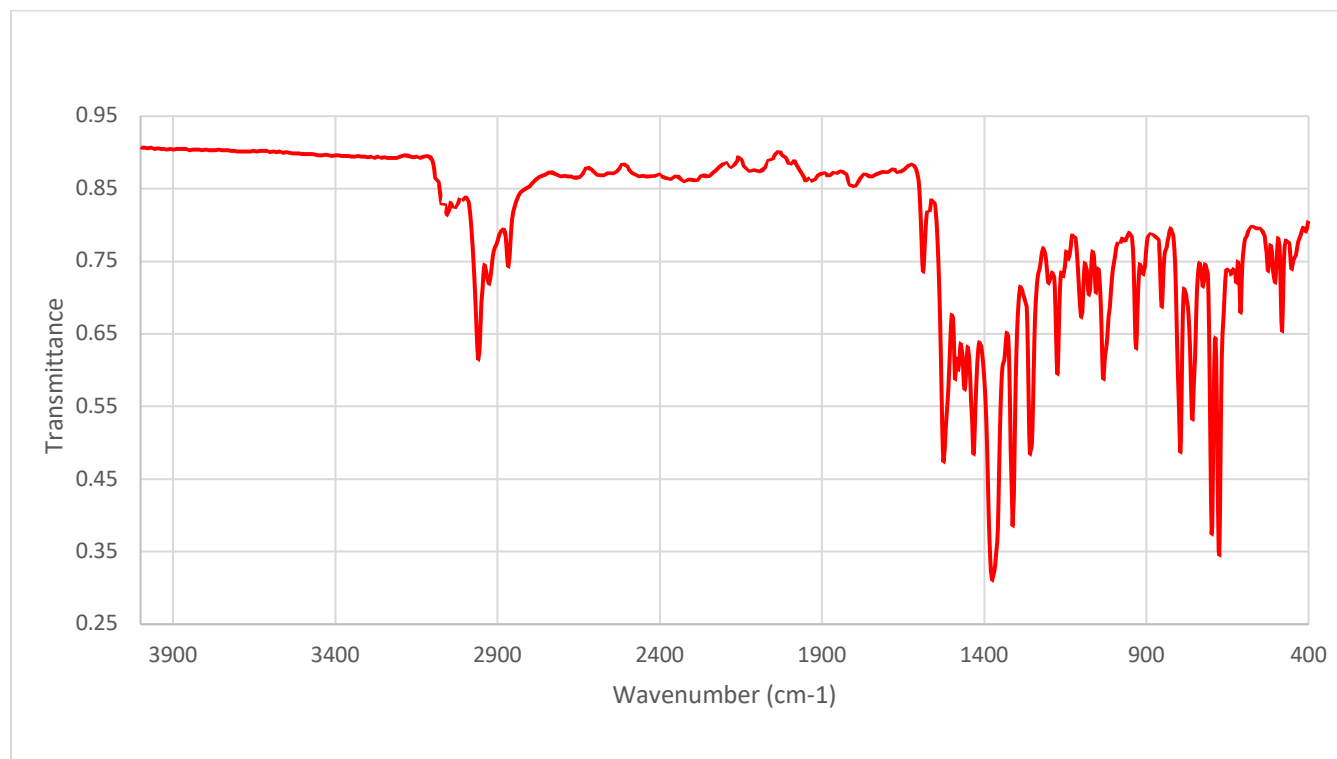

**Figure S-14:** FTIR spectrum of solid  $L^{\text{Me}}\text{Fe}(\text{CPh}_3)$  (**1**).

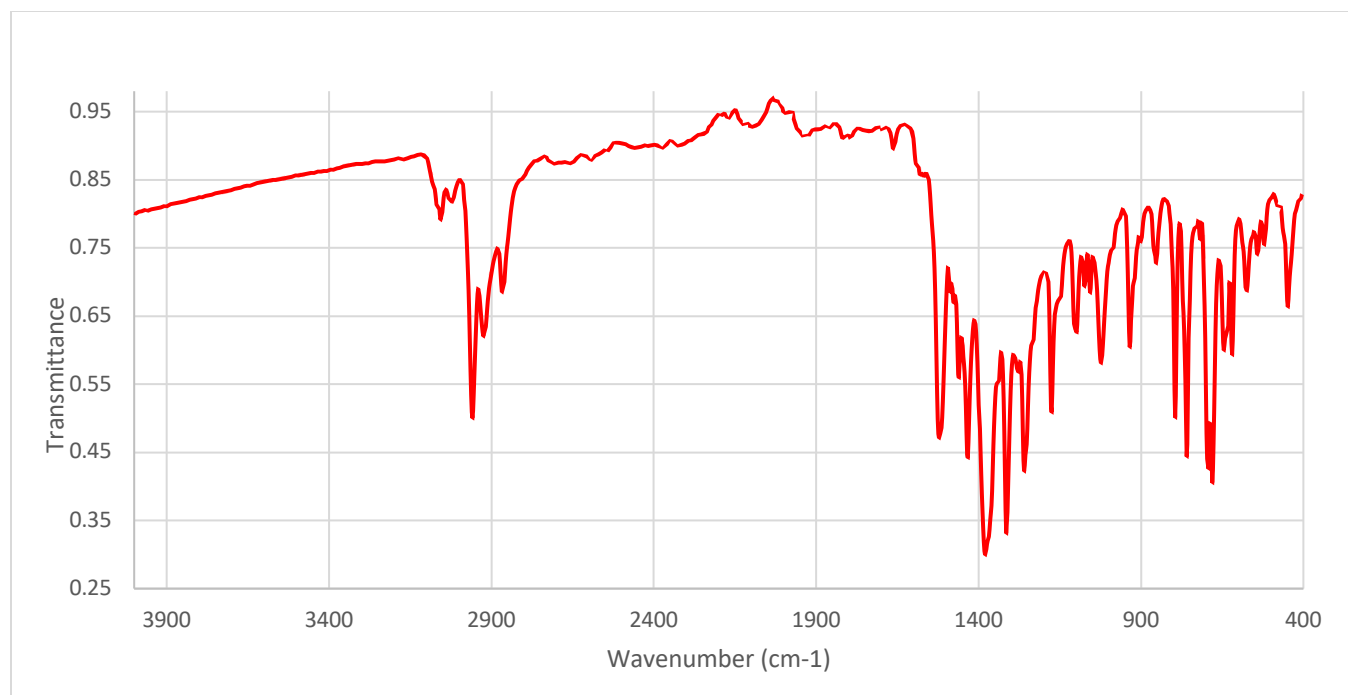

**Figure S-15:** FTIR spectrum of solid  $L^{\text{Me}}\text{Fe}(\text{Ph}_2\text{CO})$  (**2**).



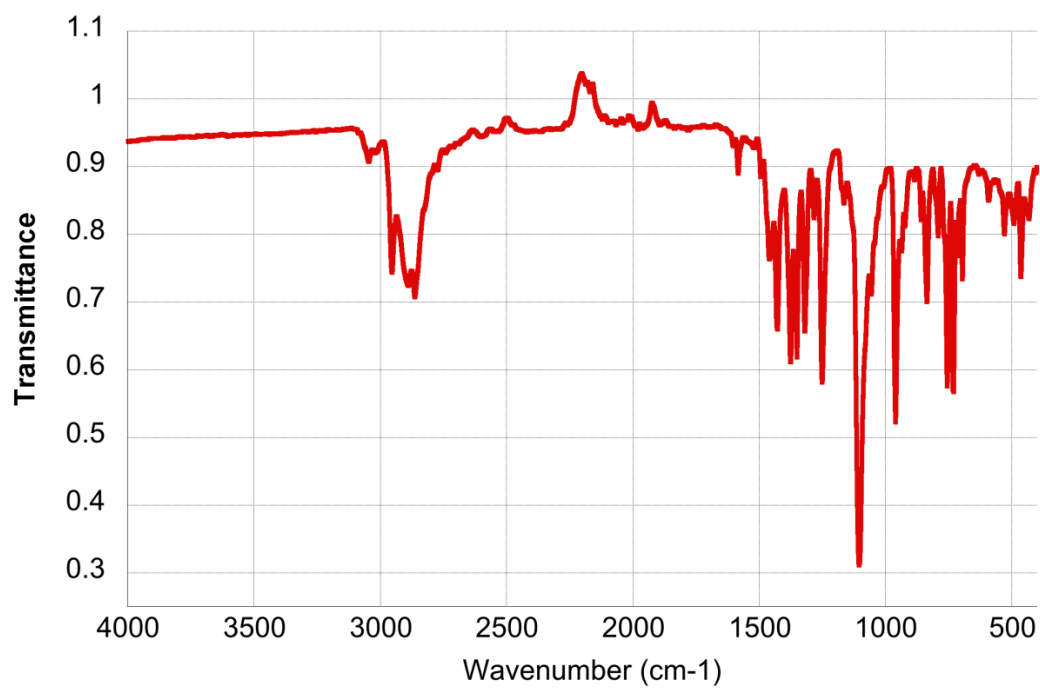

**Figure S-16:** FTIR spectrum of  $[\text{K}(18\text{-crown-}6)][\text{L}^{\text{Me}}\text{FeCH}_3]$  (**3**).

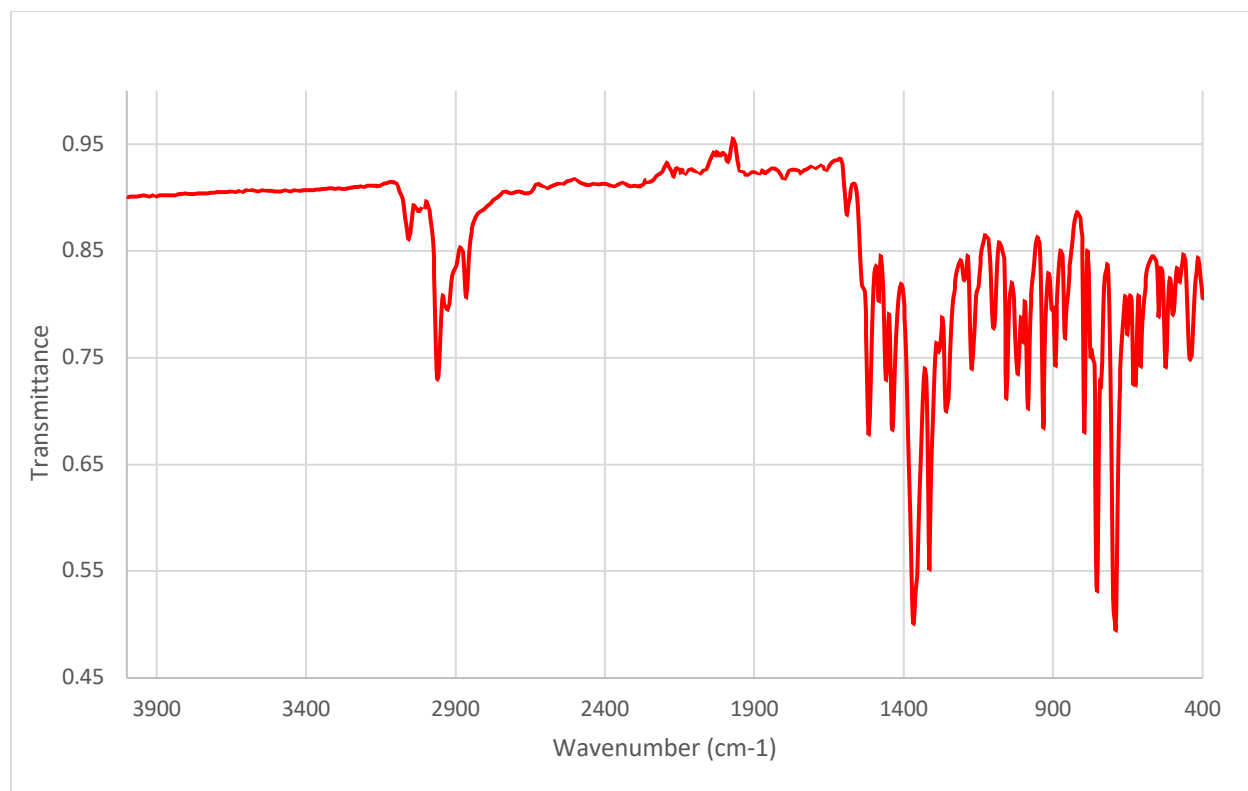

**Figure S-17:** FTIR spectrum of  $L^{\text{Me}}\text{Fe}(\text{OCPh}_2\text{CHCPh})$  (**6**).

**X-Ray Absorption Data Collection.** Fe K-edge XAS spectra were collected on the 16 pole, 2 T wiggler beamline 9-3 at the Stanford Synchrotron Radiation Lightsource (SSRL) under ring conditions of 3 GeV and 500 mA. Samples were diluted in BN, pressed into 1 mm aluminum spacers and sealed with 37  $\mu\text{m}$  Kapton tape. Samples were maintained at 10 K in a liquid He cryostat during data collection. A Si(220) double-crystal monochromator was used for energy selection and a Rh-coated mirror (set to an energy cutoff of 13 keV) was used for harmonic rejection. Internal energy calibration was performed by assigning the first inflection point of an Fe foil spectrum to 7112.6 eV.<sup>1</sup> Spectra were collected in fluorescence mode with a Lytle detector, attenuating elastic scatter into the detector using a Soller slit with an upstream Mn filter. The raw data were averaged and energy shifted using EXAFSPAK.<sup>1</sup> Data were calibrated using an internal Fe foil standard. Spectra were shifted such that the Fe foil rising edge inflection point matched the value of 7112.6 eV. The averaged data file was then normalized in Igor by applying a linear normalization to the pre-edge and a quad normalization to the post-edge to produce the final spectra.

**Computational Details.** All electronic structure and spectroscopic calculations were performed using the ORCA 4.04 computational chemistry package.<sup>2</sup> Geometry optimizations were performed using the BP86 functional,<sup>3</sup> the zeroth-order regular approximation for relativistic effects (ZORA)<sup>4</sup> as implemented by van Wüllen,<sup>5</sup> and the CP(PPP) basis set.<sup>6</sup> Optimized crystal structure coordinates were used for TDDFT calculations<sup>7</sup> of Fe K-edge XAS utilizing the B3LYP<sup>9</sup> functional. Calculated excitation energies were plotted against experimental energies for the B3LYP functional.<sup>8</sup> This correlation (Figure S-18) was used to shift the calculated energy of the spectra and produce calculated spectra that correlate well to experimental spectra.

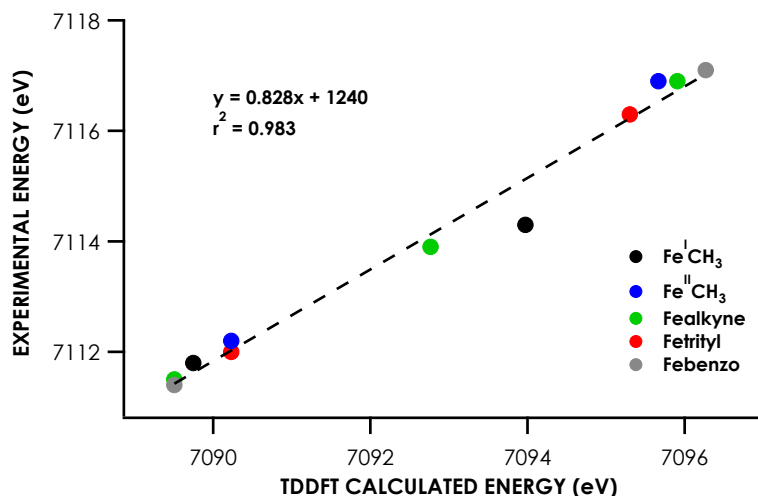

**Figure S-18:** Correlation curve of experimentally collected pre-edge energy to B3LYP calculated energy for compounds **1-5** used to shift calculated spectra.

Multireference character in the ground states of **2** and **5** was evaluated using SORCI calculations. SORCI was performed on a complete active space (CAS) for models of **2** and **5** comprising 15 electrons and 11 orbitals [CAS(15,11)]. Sufficiency of the active space was evaluated by ensuring that it captured ca. 90% of chosen state references without requiring holes or particles outside the active orbitals. The ZORA-def2-TZVPP(-f) basis set<sup>9</sup> was used on Fe, and ZORA-def2-SVP was used on all other atoms. The ZORA relativistic correction<sup>10</sup> was used in all SORCI calculations. As described elsewhere,<sup>11</sup> individual selection was used to ease the computational burden. The size of the first-order interacting space was reduced with a threshold:  $T_{sel} = 10^{-6} E_h$ . A further approximation involved reducing the reference space through another selection: all initial references that contributed less than a second threshold ( $T_{pre} = 10^{-5}$ ) to the zeroth-order states were rejected from the reference space. Starting orbitals were taken from unrestricted Kohn–Sham orbitals generated via B3LYP calculations using the aforementioned basis sets that were subsequently transformed to quasi-restricted orbitals (QROs).<sup>12</sup> These orbitals were then used in a CASSCF calculation, whereupon the resulting orbitals were used in the SORCI procedure.

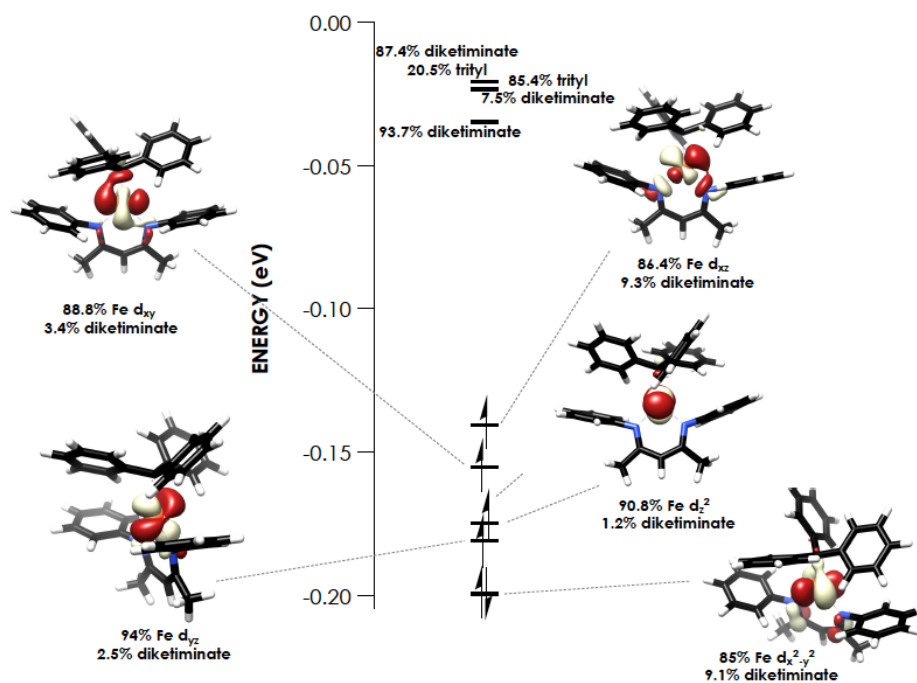

**Figure S-19.** (left) Overlay of experimental and TDDFT calculated spectra of **1** showing acceptor molecular orbitals for pre-edge transitions. (right) Molecular orbital diagram for **1** generated with QROs calculated with the B3LYP functional. Orbitals are plotted at an isovalue of 0.03 au.

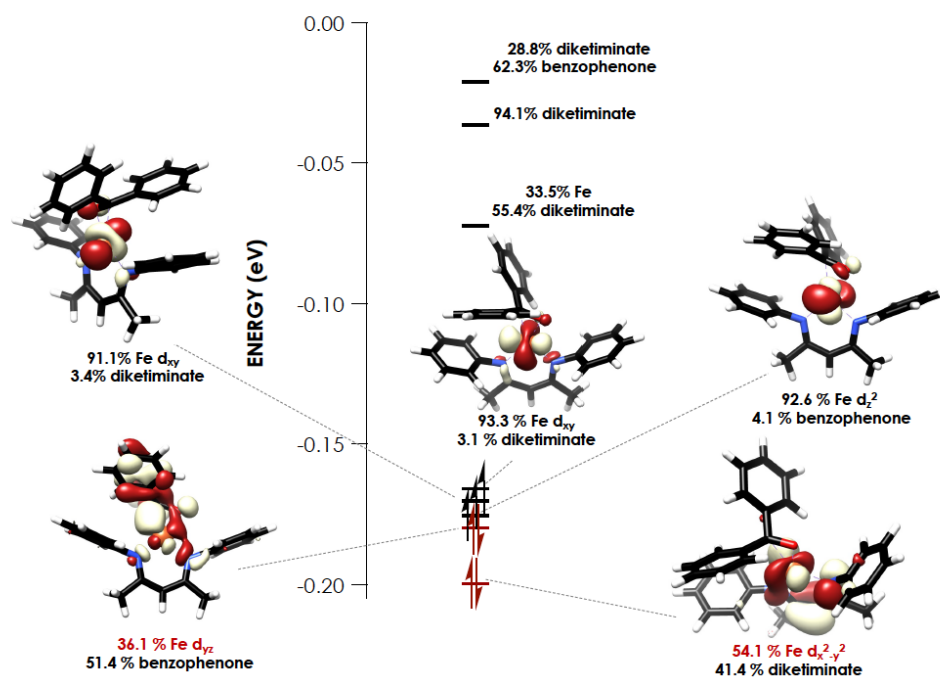

**Figure S-20.** Molecular orbital diagram for **2** generated with QROs calculated with the B3LYP functional. Orbitals with low Fe percentage are shown in red. Orbitals are plotted at an isovalue of 0.03 au.

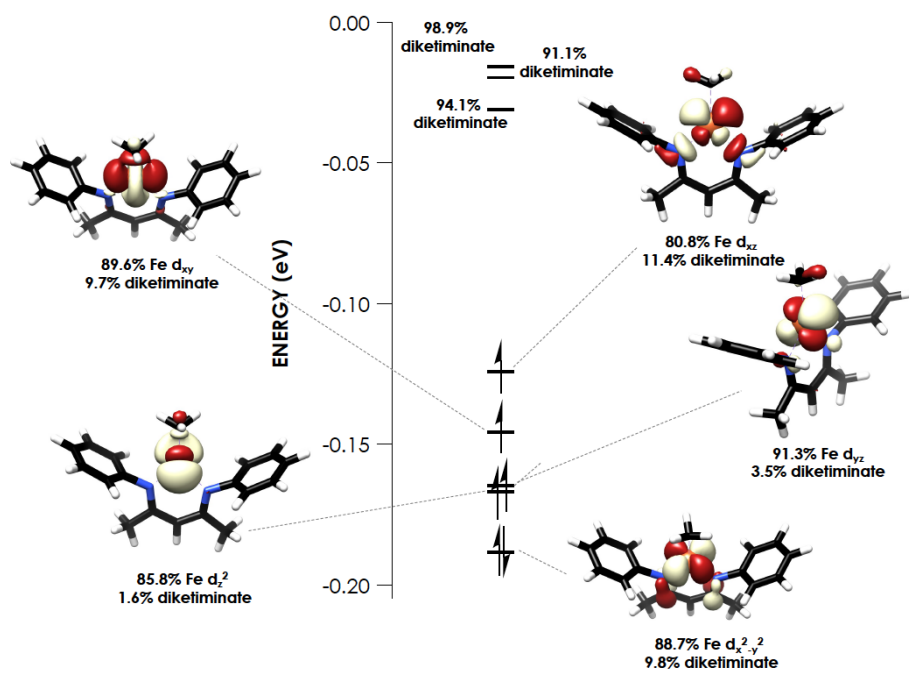

**Figure S-21.** Molecular orbital diagram for **3** generated with QROs calculated with the B3LYP functional. Orbitals are plotted at an isovalue of 0.03 au.

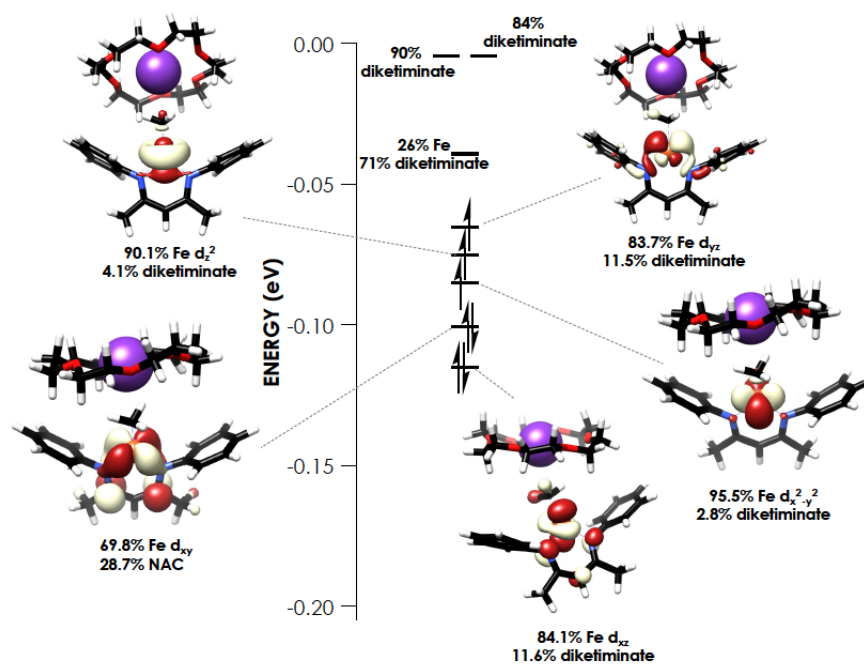

**Figure S-22.** Molecular orbital diagram for **4** generated with QROs calculated with the B3LYP functional. Orbitals are plotted at an isovalue of 0.03 au.



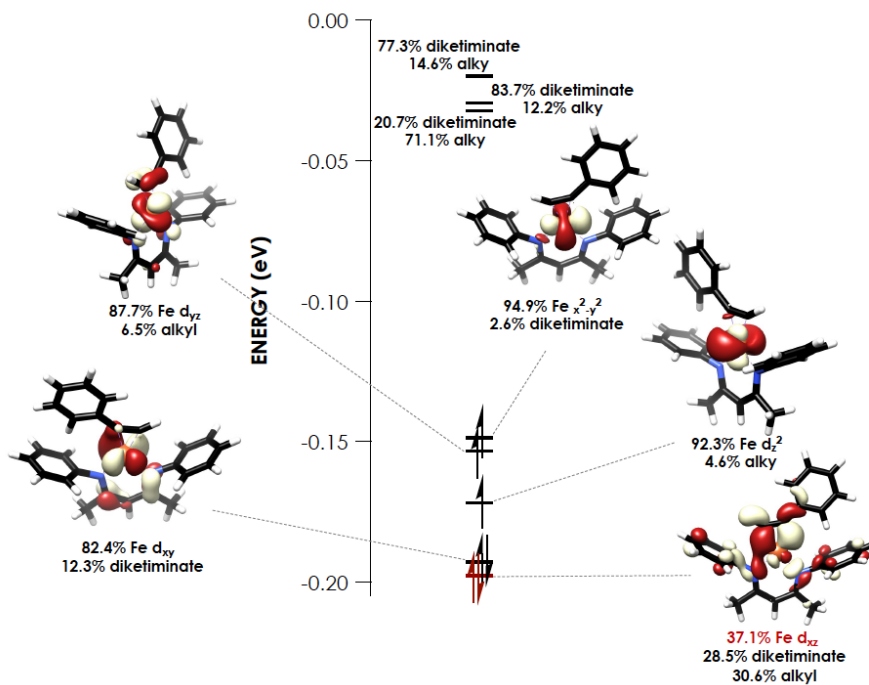

**Figure S-23.** Molecular orbital diagram for **5** generated with QROs calculated with the B3LYP functional. Orbitals are plotted at an isovalue of 0.03 au.

### Example input file: geometry optimizations

```
!OPT BP86 ZORA-def2-TZVP(-f) def2/J ZORA CPCM PAL4
!NormalPrint TightSCF SlowConv Grid4 NoFinalGrid
!PrintBasis
%geom
    optimizehydrogens true
end
%MaxCore 4000
%SCF
    MaxIter 500
end

* xyz CHARGE MULTIPLICITY
COORDINATES
*
```

### Example input file: TD-DFT for K-edge spectra

```
!B3LYP KDIIS RIJCOSX ZORA-def2-TZVP(-f) def2/J ZORA CPCM UKS
PAL6
!NormalPrint VeryTightSCF SlowConv Grid4 NoFinalGrid UNO UCO
!PrintBasis
%output print[p_mos] 1 end
%basis newgto Fe "CP(PPP)" end end
%method SpecialGridAtoms 26
    SpecialGridIntAcc 7
end
%tddft    NRoots 150
          MaxDim 500
          OrbWin[0] = 0, 0, -1, -1
          OrbWin[1] = 0, 0, -1, -1
          DoQuad true
          end
%MaxCore 4000
%SCF
    MaxIter 500
end

* xyz CHARGE MULTIPLICITY
COORDINATES
*
```

## Example input file: SORCI

```
!ROHF ZORA-def2-SVP def2-SVP/C ZORA
!NormalPrint Grid4
!MOREAD NOITER
!PrintBasis
%pal nprocs 3 end
%maxcore 30000
%moinp "FILENAME.gbwn"
%basis NewGTO Fe "ZORA-def2-TZVPP" end
                                NewAuxGTO Fe "def2-TZVPP/C" end end
%mrcki CItYPE                sorci
      UseIVOs                  false
      IntMode                   RITrafo
      Maxdim                     100
      TSel                       1e-6
      TPre                       1e-5
      TNat                       1e-5
      ETol                       1e-6
      RTol                       1e-6
      MaxDIIS                     35
      MaxIter                     400
      allsingles false
      soc
      printlevel 5
      GTensor True
      NDoubGTensor 1
      end
      NewBlock 4 *
        NRoots 5
        excitations cisd
        Refs CAS(15,11)
      end end
      NewBlock 6 *
        NRoots 5
        excitations cisd
        Refs CAS(15,11)
      end end end
%method SpecialGridAtoms 26
      SpecialGridIntAcc 7
      end

* xyz CHARGE MULTIPLICITY
COORDINATES
*
```

### Example input file: CASSCF

```
!RI-JK ZORA-def2-SVP AutoAux ZORA
!TightSCF SlowConv NormalPrint CPCM(THF) Grid4
!PrintBasis
!Conv MOREAD
%casscf nel 15
    norb 11
    mult 4, 6
    MaxIter 250
    nroots 5, 5
    orbstep SuperCI
    cistep CSFCI
    switchstep DIIS
    etol 1e-7
end
%scf
    Rotate
        { ORBITAL #1, ORBITAL #2, 90 }
    end
end
%moinp "FILENAME.gro"
%basis NewGTO Fe "ZORA-def2-TZVPP" end end
%pal nprocs 12 end
%method SpecialGridAtoms 26
    SpecialGridIntAcc 7
end
%MaxCore 4000

* xyz CHARGE MULTIPLICITY
COORDINATES
*
```

### Optimized, Truncated Structure for 1

|    |           |           |           |
|----|-----------|-----------|-----------|
| Fe | 0.000000  | 0.000000  | 0.000000  |
| N  | -1.212610 | -0.734180 | -1.428340 |
| N  | 1.307280  | 0.790110  | -1.303680 |
| C  | 0.402220  | -0.386710 | -3.200820 |
| H  | 0.576390  | -0.586360 | -4.256580 |
| C  | 3.496010  | -2.104410 | 3.579800  |
| H  | 4.341510  | -2.671230 | 3.974690  |
| C  | 0.961720  | 2.343010  | 2.275240  |
| H  | 1.882490  | 1.952840  | 1.841150  |
| C  | -1.261270 | 2.040580  | 3.078810  |
| H  | -2.121360 | 1.410740  | 3.303630  |
| C  | 2.015820  | -0.213300 | 3.699240  |
| H  | 1.703480  | 0.694770  | 4.216750  |
| C  | 1.559540  | 3.193750  | -0.983620 |
| C  | -1.168720 | -0.843930 | 2.596430  |
| C  | 2.117610  | 1.906690  | -0.878260 |
| C  | 3.402180  | 1.711760  | -0.347800 |
| C  | -2.576740 | -1.114220 | -1.146850 |
| C  | -3.546860 | -0.094450 | -1.029310 |
| C  | -2.914790 | -2.459720 | -0.985630 |
| C  | 1.741620  | -1.820950 | 1.963780  |
| H  | 1.197160  | -2.208190 | 1.094860  |
| C  | -0.114400 | 1.471440  | 2.501660  |
| C  | -0.825060 | -0.844440 | -2.708400 |
| C  | 1.335040  | 0.461560  | -2.595150 |
| C  | 0.000000  | -0.000000 | 2.123500  |
| C  | 3.564160  | 4.090790  | 0.026430  |
| H  | 4.129670  | 4.949880  | 0.390820  |
| C  | -1.047600 | -1.863550 | 3.535300  |
| H  | -0.078290 | -2.065410 | 3.992060  |

|   |           |           |           |
|---|-----------|-----------|-----------|
| C | -3.380930 | -2.426350 | 3.357630  |
| H | -4.233300 | -3.043940 | 3.646010  |
| C | 0.893290  | 3.687610  | 2.590580  |
| H | 1.756830  | 4.324950  | 2.395450  |
| C | 1.303510  | -0.647100 | 2.579630  |
| C | 2.303920  | 4.271650  | -0.524230 |
| H | 1.882230  | 5.277540  | -0.586870 |
| C | -0.257020 | 4.226980  | 3.147830  |
| H | -0.311060 | 5.289100  | 3.394120  |
| C | 3.100460  | -0.928000 | 4.182890  |
| H | 3.626410  | -0.565270 | 5.069290  |
| C | 2.823050  | -2.544260 | 2.458440  |
| H | 3.128720  | -3.465130 | 1.957250  |
| C | -5.213590 | -1.782880 | -0.632920 |
| H | -6.252890 | -2.051310 | -0.433620 |
| C | -3.528250 | -1.391900 | 2.442690  |
| H | -4.505080 | -1.191320 | 2.001270  |
| C | -1.761350 | -1.444430 | -3.726860 |
| H | -2.012750 | -2.487900 | -3.489920 |
| H | -1.310730 | -1.414120 | -4.725140 |
| H | -2.712050 | -0.891620 | -3.757730 |
| C | 2.370440  | 1.050420  | -3.509730 |
| H | 2.182900  | 2.122990  | -3.675170 |
| H | 2.354470  | 0.549790  | -4.484050 |
| H | 3.381760  | 0.971470  | -3.085960 |
| C | -4.257760 | -2.773810 | -0.730900 |
| H | -4.543600 | -3.820270 | -0.603730 |
| C | -2.452980 | -0.632760 | 2.067840  |
| H | -2.600140 | 0.168400  | 1.343120  |
| C | -1.328230 | 3.389290  | 3.392750  |
| H | -2.241160 | 3.784830  | 3.844660  |

|   |           |           |           |
|---|-----------|-----------|-----------|
| C | -2.127180 | -2.641300 | 3.911130  |
| H | -1.983720 | -3.434730 | 4.648650  |
| C | -4.861500 | -0.469570 | -0.778380 |
| H | -5.624860 | 0.308160  | -0.693570 |
| C | 4.104210  | 2.825530  | 0.095390  |
| H | 5.102540  | 2.687880  | 0.518060  |
| H | 0.561680  | 3.321170  | -1.403180 |
| H | 3.819840  | 0.707140  | -0.281310 |
| H | -3.257970 | 0.948940  | -1.157380 |
| H | -2.151060 | -3.233880 | -1.056940 |

### Optimized, Truncated Structure for 2

|    |           |           |           |
|----|-----------|-----------|-----------|
| Fe | -0.000000 | 0.000000  | 0.000000  |
| O  | 0.870430  | 0.799950  | 1.404460  |
| N  | 0.794430  | 1.053570  | -1.504760 |
| N  | -1.076220 | -1.214980 | -1.070730 |
| C  | 1.082640  | 1.613680  | -3.864170 |
| H  | 1.093430  | 2.693520  | -3.657930 |
| H  | 0.584650  | 1.441860  | -4.825130 |
| H  | 2.134540  | 1.305010  | -3.964960 |
| C  | 0.414960  | 0.851270  | -2.768570 |
| C  | -0.554450 | -0.086880 | -3.140510 |
| H  | -0.783350 | -0.101760 | -4.204920 |
| C  | -1.206650 | -1.060120 | -2.392830 |
| C  | -2.061140 | -2.031350 | -3.167930 |
| H  | -3.041690 | -2.174520 | -2.691990 |
| H  | -1.584550 | -3.021960 | -3.213460 |
| H  | -2.212880 | -1.678380 | -4.193690 |
| C  | 1.862400  | 1.980620  | -1.221490 |
| C  | 3.187410  | 1.508490  | -1.236280 |
| C  | 4.193040  | 2.424180  | -0.912020 |

|   |           |           |           |
|---|-----------|-----------|-----------|
| H | 5.231500  | 2.082030  | -0.917370 |
| C | 3.915920  | 3.722390  | -0.614730 |
| H | 4.727710  | 4.412200  | -0.375040 |
| C | 2.609420  | 4.165960  | -0.579480 |
| H | 2.388580  | 5.203940  | -0.321850 |
| C | 1.561680  | 3.297800  | -0.881900 |
| C | -1.624570 | -2.392420 | -0.450750 |
| C | -2.849870 | -2.310160 | 0.249060  |
| C | -3.336220 | -3.467470 | 0.843200  |
| H | -4.287480 | -3.427340 | 1.379590  |
| C | -2.638220 | -4.661620 | 0.782050  |
| H | -3.034610 | -5.553300 | 1.269760  |
| C | -1.434430 | -4.711560 | 0.110290  |
| H | -0.878750 | -5.651490 | 0.068760  |
| C | -0.915050 | -3.595580 | -0.526760 |
| C | -0.000000 | -0.000000 | 2.072940  |
| C | -1.110500 | 0.701250  | 2.763590  |
| C | -1.792930 | 1.757000  | 2.165070  |
| H | -1.547420 | 2.031420  | 1.134810  |
| C | -2.780470 | 2.449740  | 2.834850  |
| H | -3.311460 | 3.261650  | 2.334580  |
| C | -3.086030 | 2.114940  | 4.146810  |
| H | -3.863260 | 2.662900  | 4.683360  |
| C | -2.408430 | 1.091220  | 4.764660  |
| H | -2.638290 | 0.835690  | 5.801730  |
| C | -1.432990 | 0.387290  | 4.096050  |
| H | -0.899610 | -0.415550 | 4.605120  |
| C | 0.519380  | -1.266140 | 2.619330  |
| C | -0.308570 | -2.353910 | 2.870700  |
| H | -1.372200 | -2.283610 | 2.637430  |
| C | 0.197860  | -3.516170 | 3.396770  |



|   |           |           |           |
|---|-----------|-----------|-----------|
| H | -0.470050 | -4.360260 | 3.580310  |
| C | 1.543230  | -3.625390 | 3.697690  |
| H | 1.938310  | -4.549660 | 4.123680  |
| C | 2.379630  | -2.565240 | 3.442020  |
| H | 3.444810  | -2.647210 | 3.673390  |
| C | 1.896880  | -1.391830 | 2.901310  |
| H | 2.561550  | -0.552200 | 2.697030  |
| H | 3.405070  | 0.469530  | -1.480680 |
| H | 0.523340  | 3.629580  | -0.862090 |
| H | -3.387970 | -1.363840 | 0.299950  |
| H | 0.035990  | -3.632840 | -1.058480 |

**Full Structure of 2 for SORCI and CASSCF**

|    |           |           |           |
|----|-----------|-----------|-----------|
| Fe | 0.000000  | 0.000000  | 0.000000  |
| O  | -0.820530 | 0.526180  | -1.555620 |
| N  | -1.334090 | 0.705430  | 1.314540  |
| N  | 1.201140  | -0.845390 | 1.274160  |
| C  | -2.188660 | 1.076960  | 3.571810  |
| H  | -2.461160 | 1.983130  | 3.321510  |
| H  | -1.831210 | 1.084380  | 4.484300  |
| H  | -2.963670 | 0.478420  | 3.528420  |
| C  | -1.135500 | 0.595880  | 2.630100  |
| C  | -0.000000 | 0.000000  | 3.190260  |
| H  | 0.068310  | 0.087190  | 4.134040  |
| C  | 1.044760  | -0.696180 | 2.594090  |
| C  | 2.013510  | -1.371420 | 3.532060  |
| H  | 2.931380  | -1.180080 | 3.249010  |
| H  | 1.862880  | -2.339260 | 3.516410  |
| H  | 1.874940  | -1.035330 | 4.442580  |
| C  | -2.573450 | 1.257160  | 0.824830  |
| C  | -3.663760 | 0.391810  | 0.621970  |

|   |           |           |           |
|---|-----------|-----------|-----------|
| C | -4.834260 | 0.953580  | 0.103060  |
| H | -5.583920 | 0.390970  | -0.057230 |
| C | -4.932900 | 2.281170  | -0.176790 |
| H | -5.753440 | 2.636090  | -0.498740 |
| C | -3.847320 | 3.114200  | 0.003500  |
| H | -3.917900 | 4.033840  | -0.216980 |
| C | -2.648700 | 2.611410  | 0.506930  |
| C | -3.600070 | -1.092490 | 0.893370  |
| H | -2.749080 | -1.273980 | 1.386870  |
| C | -3.545260 | -1.870880 | -0.422250 |
| H | -2.761580 | -1.586740 | -0.937020 |
| H | -4.358210 | -1.693450 | -0.939980 |
| H | -3.480410 | -2.830530 | -0.231460 |
| C | -4.749820 | -1.583250 | 1.762610  |
| H | -4.724180 | -1.123910 | 2.627550  |
| H | -4.664280 | -2.550090 | 1.903200  |
| H | -5.601100 | -1.391770 | 1.315720  |
| C | -1.460920 | 3.552900  | 0.652030  |
| H | -0.651900 | 2.998120  | 0.849910  |
| C | -1.187710 | 4.338740  | -0.619700 |
| H | -1.097260 | 3.720980  | -1.374130 |
| H | -0.357450 | 4.848790  | -0.515190 |
| H | -1.931380 | 4.952540  | -0.789580 |
| C | -1.662710 | 4.523450  | 1.824660  |
| H | -1.689400 | 4.019300  | 2.664130  |
| H | -2.507590 | 5.007870  | 1.705420  |
| H | -0.920750 | 5.161660  | 1.851000  |
| C | 2.191130  | -1.771720 | 0.791210  |
| C | 3.430000  | -1.287550 | 0.313020  |
| C | 4.351320  | -2.215050 | -0.155810 |
| H | 5.197180  | -1.913850 | -0.466250 |

|   |           |           |           |
|---|-----------|-----------|-----------|
| C | 4.065410  | -3.569450 | -0.184400 |
| H | 4.707490  | -4.187800 | -0.514500 |
| C | 2.841310  | -4.015360 | 0.269030  |
| H | 2.644070  | -4.945790 | 0.235520  |
| C | 1.894740  | -3.138720 | 0.775490  |
| C | 3.782060  | 0.176990  | 0.305000  |
| H | 2.936570  | 0.702440  | 0.400530  |
| C | 4.458410  | 0.588970  | -1.007430 |
| H | 3.960210  | 0.213310  | -1.764320 |
| H | 5.377330  | 0.249900  | -1.022060 |
| H | 4.468810  | 1.567260  | -1.077150 |
| C | 4.696550  | 0.526380  | 1.473710  |
| H | 4.219050  | 0.378200  | 2.317050  |
| H | 4.961660  | 1.466830  | 1.409790  |
| H | 5.494960  | -0.041630 | 1.445100  |
| C | 0.542320  | -3.665320 | 1.245140  |
| H | 0.145190  | -2.986420 | 1.863070  |
| C | -0.392560 | -3.821960 | 0.061330  |
| H | -0.529900 | -2.950800 | -0.364620 |
| H | -1.254140 | -4.173130 | 0.368410  |
| H | 0.000890  | -4.441590 | -0.587030 |
| C | 0.660430  | -4.984120 | 2.005130  |
| H | 1.312690  | -4.884760 | 2.729120  |
| H | 0.957320  | -5.689990 | 1.391500  |
| H | -0.211560 | -5.222010 | 2.381230  |
| C | 0.359560  | 0.060770  | -2.040610 |
| C | 1.294790  | 1.095800  | -2.546590 |
| C | 1.495330  | 2.294650  | -1.867550 |
| H | 1.059380  | 2.436280  | -1.035220 |
| C | 2.314880  | 3.282300  | -2.374120 |
| H | 2.454180  | 4.083860  | -1.884640 |

|   |           |           |           |
|---|-----------|-----------|-----------|
| C | 2.933000  | 3.099290  | -3.603400 |
| H | 3.494170  | 3.776490  | -3.960260 |
| C | 2.730240  | 1.932920  | -4.301500 |
| H | 3.150580  | 1.812740  | -5.144790 |
| C | 1.925710  | 0.938490  | -3.793680 |
| H | 1.795530  | 0.140070  | -4.290310 |
| C | 0.368380  | -1.287900 | -2.634270 |
| C | 1.527110  | -2.051970 | -2.708200 |
| H | 2.339510  | -1.705550 | -2.356370 |
| C | 1.511780  | -3.298600 | -3.282430 |
| H | 2.311510  | -3.812010 | -3.316360 |
| C | 0.342950  | -3.816800 | -3.809500 |
| H | 0.340700  | -4.672940 | -4.220740 |
| C | -0.815720 | -3.081720 | -3.732050 |
| H | -1.620450 | -3.438930 | -4.086740 |
| C | -0.828530 | -1.832390 | -3.147830 |
| H | -1.639390 | -1.340320 | -3.091340 |

**Optimized, Truncated Structure of 3 for TD-DFT**

|    |           |           |           |
|----|-----------|-----------|-----------|
| Fe | 0.000000  | 0.000000  | 0.000000  |
| C  | -1.775740 | -1.559020 | -3.631860 |
| H  | -1.714570 | -2.639840 | -3.432470 |
| H  | -1.482930 | -1.381930 | -4.673040 |
| H  | -2.832940 | -1.276470 | -3.517260 |
| C  | -2.142680 | -1.732070 | -0.852790 |
| C  | 2.121900  | 1.814540  | -0.701130 |
| C  | 0.000000  | -0.000000 | 2.002830  |
| H  | -0.810570 | 0.648510  | 2.379680  |
| H  | 0.954570  | 0.380120  | 2.403520  |

|   |           |           |           |
|---|-----------|-----------|-----------|
| H | -0.168010 | -1.012380 | 2.408560  |
| C | -0.894170 | -0.784300 | -2.688970 |
| C | -3.425320 | -1.182370 | -0.701080 |
| C | 1.763680  | 3.142850  | -0.418570 |
| C | 0.085730  | 0.036390  | -3.258110 |
| H | 0.117850  | 0.039600  | -4.346860 |
| C | -4.396290 | -1.940350 | -0.051760 |
| H | -5.393930 | -1.516730 | 0.086920  |
| C | 2.682280  | 3.930480  | 0.286680  |
| H | 2.418080  | 4.962800  | 0.528750  |
| C | 1.034960  | 0.850510  | -2.627370 |
| C | -4.115770 | -3.198480 | 0.428680  |
| H | -4.888150 | -3.769360 | 0.947530  |
| C | 3.905260  | 3.429780  | 0.670250  |
| H | 4.604800  | 4.065420  | 1.216690  |
| C | 1.959700  | 1.659110  | -3.505380 |
| H | 1.823960  | 2.737410  | -3.333920 |
| H | 1.772150  | 1.451850  | -4.565180 |
| H | 3.013830  | 1.434310  | -3.284470 |
| C | -2.868310 | -3.741570 | 0.244710  |
| H | -2.653200 | -4.746750 | 0.615760  |
| C | 4.245460  | 2.133390  | 0.375340  |
| H | 5.216370  | 1.741910  | 0.689220  |
| C | -1.852100 | -3.028980 | -0.398530 |
| C | 3.362840  | 1.288360  | -0.302020 |
| N | -1.077970 | -0.913970 | -1.375800 |
| N | 1.146830  | 0.939320  | -1.301850 |
| H | -3.631980 | -0.173840 | -1.059480 |
| H | 0.788870  | 3.525970  | -0.717140 |
| H | -0.852260 | -3.443760 | -0.526310 |
| H | 3.613830  | 0.250410  | -0.520280 |

### Optimized, Truncated Structure of 4 for TD-DFT

|    |           |           |           |
|----|-----------|-----------|-----------|
| Fe | 0.000000  | 0.000000  | 0.000000  |
| C  | -0.000000 | -0.000000 | 2.036910  |
| H  | 0.287140  | -0.986350 | 2.440760  |
| H  | 0.647690  | 0.777350  | 2.479060  |
| H  | -1.042290 | 0.218870  | 2.331620  |
| N  | 0.513630  | -1.400500 | -1.227490 |
| N  | -0.366230 | 1.393280  | -1.267970 |
| C  | 1.099150  | -2.308400 | -3.490750 |
| H  | 1.937160  | -2.874100 | -3.055180 |
| H  | 1.420000  | -1.894210 | -4.454700 |
| H  | 0.295010  | -3.036230 | -3.687500 |
| C  | 0.644050  | -1.179080 | -2.564380 |
| C  | 0.437500  | 0.079760  | -3.156350 |
| H  | 0.651450  | 0.127220  | -4.224840 |
| C  | -0.033900 | 1.258030  | -2.593590 |
| C  | -0.155160 | 2.483760  | -3.487750 |
| H  | -1.198010 | 2.823830  | -3.585610 |
| H  | 0.223750  | 2.258550  | -4.492590 |
| H  | 0.415860  | 3.336220  | -3.087020 |
| C  | 0.639770  | -2.606600 | -0.675150 |
| C  | -0.346540 | -3.590860 | -0.922360 |
| C  | -0.259610 | -4.831290 | -0.300940 |
| H  | -1.024220 | -5.589670 | -0.486900 |
| C  | 0.782050  | -5.089780 | 0.592490  |
| H  | 0.837140  | -6.048990 | 1.110320  |
| C  | 1.741650  | -4.121930 | 0.816820  |
| H  | 2.560330  | -4.340500 | 1.508920  |
| C  | 1.722450  | -2.896460 | 0.170080  |
| C  | -0.779340 | 2.545750  | -0.804130 |

|   |           |           |           |
|---|-----------|-----------|-----------|
| C | -2.103880 | 2.913120  | -0.982700 |
| C | -2.754650 | 3.973510  | -0.359200 |
| H | -3.828690 | 4.120470  | -0.478840 |
| C | -1.944640 | 4.907000  | 0.281760  |
| H | -2.374290 | 5.801680  | 0.738800  |
| C | -0.595920 | 4.642070  | 0.422550  |
| H | 0.039070  | 5.354630  | 0.955260  |
| C | -0.015190 | 3.487340  | -0.090190 |
| K | -0.997450 | -0.501750 | 4.951920  |
| O | -3.186540 | -1.354000 | 3.331290  |
| O | -0.925020 | -3.291940 | 4.230950  |
| O | 0.924840  | -2.374010 | 6.236900  |
| O | 1.077490  | 0.426060  | 6.445270  |
| O | -0.997730 | 2.102850  | 6.087340  |
| O | -2.960080 | 1.093630  | 4.261440  |
| C | -2.805660 | -2.670480 | 2.792390  |
| H | -3.709210 | -3.200410 | 2.442510  |
| H | -2.205930 | -2.436230 | 1.892260  |
| C | -2.090180 | -3.654570 | 3.605850  |
| H | -2.788060 | -4.070730 | 4.368860  |
| H | -1.913060 | -4.486470 | 2.888900  |
| C | -0.230300 | -3.876470 | 5.212950  |
| H | -0.237850 | -4.983840 | 5.025940  |
| H | -0.794280 | -3.802080 | 6.173510  |
| C | 1.122340  | -3.549490 | 5.539150  |
| H | 1.559250  | -4.342560 | 6.173490  |
| H | 1.783250  | -3.393340 | 4.663660  |
| C | 2.092790  | -1.731580 | 6.457470  |
| H | 2.637980  | -1.587560 | 5.496370  |
| H | 2.777760  | -2.330610 | 7.097810  |
| C | 1.924780  | -0.409390 | 7.124780  |

|   |           |           |           |
|---|-----------|-----------|-----------|
| H | 1.539050  | -0.597660 | 8.147040  |
| H | 2.933370  | 0.037260  | 7.243970  |
| C | 1.023200  | 1.513680  | 7.321930  |
| H | 1.900470  | 2.159120  | 7.112170  |
| H | 1.116230  | 1.197000  | 8.371640  |
| C | -0.230840 | 2.266510  | 7.226810  |
| H | -0.871080 | 1.976680  | 8.086060  |
| H | -0.001900 | 3.338580  | 7.402030  |
| C | -1.816840 | 2.844640  | 5.209330  |
| H | -1.255620 | 2.924470  | 4.258650  |
| H | -1.903260 | 3.888050  | 5.581750  |
| C | -3.158370 | 2.387490  | 4.855800  |
| H | -3.875530 | 2.305370  | 5.690660  |
| H | -3.543060 | 3.104750  | 4.111060  |
| C | -4.037730 | 0.939380  | 3.466900  |
| H | -3.900530 | 1.547170  | 2.541810  |
| H | -4.972680 | 1.305910  | 3.932490  |
| C | -4.223380 | -0.447230 | 3.177380  |
| H | -5.051910 | -0.815840 | 3.825750  |
| H | -4.654520 | -0.527470 | 2.154820  |
| H | -1.177290 | -3.348670 | -1.586890 |
| H | 2.483890  | -2.136590 | 0.347730  |
| H | -2.725330 | 2.201490  | -1.539490 |
| H | 1.046820  | 3.289820  | 0.080590  |

**Optimized Truncated Structure of 5 for TD-DFT**

|    |           |           |          |
|----|-----------|-----------|----------|
| Fe | 0.000000  | 0.000000  | 0.000000 |
| N  | -1.435360 | 0.017150  | 1.353610 |
| N  | 1.455130  | -0.003590 | 1.357390 |
| C  | 3.510860  | -1.100380 | 0.594130 |
| C  | -1.256920 | 0.017020  | 2.676350 |



|   |           |           |           |
|---|-----------|-----------|-----------|
| C | 2.804780  | 0.075410  | 0.852660  |
| C | 3.345100  | 1.338040  | 0.563250  |
| C | 1.265300  | 0.019190  | 2.679050  |
| C | -0.000000 | 0.000000  | 3.277830  |
| H | -0.001020 | 0.001580  | 4.366640  |
| C | -2.766250 | 0.103780  | 0.824430  |
| C | -1.248730 | 0.280690  | -3.020670 |
| C | -2.455360 | 0.021950  | 3.596070  |
| H | -3.098440 | 0.894500  | 3.407450  |
| H | -2.137980 | 0.043310  | 4.644420  |
| H | -3.079150 | -0.870410 | 3.438530  |
| C | 2.460780  | 0.074380  | 3.604520  |
| H | 3.125840  | -0.787360 | 3.446800  |
| H | 2.137790  | 0.078830  | 4.651720  |
| H | 3.062160  | 0.976690  | 3.420710  |
| C | -3.500430 | -1.075810 | 0.603580  |
| C | -3.268150 | 1.359200  | 0.457870  |
| C | 4.774620  | -0.995860 | 0.012270  |
| H | 5.340140  | -1.904500 | -0.206500 |
| C | 4.608160  | 1.381840  | -0.019910 |
| H | 5.041760  | 2.355200  | -0.264440 |
| C | -4.543680 | 1.412760  | -0.119310 |
| H | -4.954470 | 2.383130  | -0.406960 |
| C | -0.285760 | 0.120350  | -1.932810 |
| C | 0.949380  | 0.020230  | -1.665860 |
| C | -2.600660 | 0.117650  | -2.829870 |
| H | -2.975610 | -0.155090 | -1.845060 |
| C | -4.754910 | -0.957660 | 0.005290  |
| H | -5.335970 | -1.863070 | -0.186010 |
| C | -0.817460 | 0.609110  | -4.281480 |
| H | 0.252380  | 0.740110  | -4.462420 |

|   |           |           |           |
|---|-----------|-----------|-----------|
| C | -5.269490 | 0.266450  | -0.346600 |
| H | -6.254080 | 0.328990  | -0.813340 |
| C | 5.313860  | 0.241560  | -0.291290 |
| H | 6.300700  | 0.304910  | -0.753530 |
| C | -3.489620 | 0.290850  | -3.878730 |
| H | -4.557940 | 0.156840  | -3.695470 |
| C | -3.043160 | 0.631820  | -5.112670 |
| H | -3.751670 | 0.775330  | -5.932250 |
| C | -1.705810 | 0.783330  | -5.332210 |
| H | -1.325480 | 1.048530  | -6.320480 |
| H | 1.957530  | -0.027510 | -2.072640 |
| H | 3.064870  | -2.068410 | 0.823760  |
| H | 2.772460  | 2.242000  | 0.769600  |
| H | -3.080560 | -2.043360 | 0.877710  |
| H | -2.674470 | 2.257840  | 0.624160  |

**Full Structure of 5 for SORCI and CASSCF**

|    |           |           |           |
|----|-----------|-----------|-----------|
| Fe | 0.000000  | 0.000000  | 0.000000  |
| N  | -1.435350 | 0.017630  | 1.353610  |
| N  | 1.455130  | -0.004080 | 1.357390  |
| C  | 3.510500  | -1.101550 | 0.594130  |
| C  | -1.256910 | 0.017440  | 2.676350  |
| C  | 2.804810  | 0.074470  | 0.852660  |
| C  | 3.345550  | 1.336930  | 0.563250  |
| C  | 1.265310  | 0.018760  | 2.679050  |
| C  | 0.000000  | -0.000000 | 3.277830  |
| H  | -0.001260 | -0.029130 | 4.207520  |
| C  | -2.766210 | 0.104700  | 0.824430  |
| C  | -1.248630 | 0.281110  | -3.020670 |
| C  | -2.455350 | 0.022760  | 3.596070  |
| H  | -3.059050 | 0.717460  | 3.330240  |

|   |           |           |           |
|---|-----------|-----------|-----------|
| H | -2.165110 | 0.176830  | 4.498410  |
| H | -2.900860 | -0.826770 | 3.544670  |
| C | 2.460810  | 0.073560  | 3.604520  |
| H | 3.039260  | -0.672530 | 3.424730  |
| H | 2.162200  | 0.034780  | 4.516780  |
| H | 2.940490  | 0.892300  | 3.459700  |
| C | -3.500780 | -1.074640 | 0.603580  |
| C | -3.267700 | 1.360290  | 0.457870  |
| C | 2.921970  | -2.472050 | 0.877630  |
| H | 2.124110  | -2.340930 | 1.431670  |
| C | 4.774290  | -0.997460 | 0.012270  |
| H | 5.259270  | -1.768590 | -0.173730 |
| C | 4.608620  | 1.380300  | -0.019910 |
| H | 4.981380  | 2.207020  | -0.230490 |
| C | -4.543210 | 1.414270  | -0.119300 |
| H | -4.905160 | 2.239220  | -0.353790 |
| C | -0.285720 | 0.120450  | -1.932810 |
| C | 0.949390  | 0.019920  | -1.665860 |
| C | 2.593410  | 2.615750  | 0.885670  |
| H | 1.850480  | 2.384090  | 1.482080  |
| C | -2.600620 | 0.118520  | -2.829870 |
| H | -2.921150 | -0.110890 | -1.987890 |
| C | 3.870080  | -3.396790 | 1.647030  |
| H | 4.660800  | -3.550640 | 1.124980  |
| H | 3.430510  | -4.233330 | 1.817610  |
| H | 4.112260  | -2.987930 | 2.480550  |
| C | -2.929910 | -2.439220 | 0.937150  |
| H | -2.214780 | -2.304000 | 1.594630  |
| C | -2.445360 | 2.628180  | 0.655600  |
| H | -1.549350 | 2.355530  | 0.945150  |
| C | 2.476530  | -3.133660 | -0.411980 |

|   |           |           |           |
|---|-----------|-----------|-----------|
| H | 1.864570  | -2.553160 | -0.873870 |
| H | 2.039680  | -3.963770 | -0.209890 |
| H | 3.240940  | -3.299820 | -0.966840 |
| C | -4.755230 | -0.956080 | 0.005290  |
| H | -5.254770 | -1.721830 | -0.159220 |
| C | -0.817250 | 0.609380  | -4.281480 |
| H | 0.093640  | 0.717120  | -4.435570 |
| C | 3.474260  | 3.625550  | 1.612210  |
| H | 3.851370  | 3.216840  | 2.394270  |
| H | 2.946120  | 4.383850  | 1.870170  |
| H | 4.180530  | 3.911810  | 1.027930  |
| C | -5.269400 | 0.268210  | -0.346600 |
| H | -6.111500 | 0.323730  | -0.739110 |
| C | 5.313940  | 0.239780  | -0.291290 |
| H | 6.156570  | 0.295110  | -0.680010 |
| C | -3.014300 | 3.524120  | 1.726640  |
| H | -2.460100 | 4.301770  | 1.821890  |
| H | -3.042620 | 3.048340  | 2.560050  |
| H | -3.902810 | 3.793230  | 1.480570  |
| C | -3.489520 | 0.292010  | -3.878720 |
| H | -4.401080 | 0.173050  | -3.734870 |
| C | 2.001030  | 3.260930  | -0.372700 |
| H | 2.712720  | 3.522870  | -0.962500 |
| H | 1.489070  | 4.031940  | -0.125280 |
| H | 1.432750  | 2.629920  | -0.819560 |
| C | -3.042940 | 0.632840  | -5.112670 |
| H | -3.646210 | 0.763680  | -5.807950 |
| C | -1.705540 | 0.783900  | -5.332200 |
| H | -1.391580 | 1.002240  | -6.180690 |
| C | -3.943570 | -3.383210 | 1.561750  |
| H | -4.327740 | -2.969640 | 2.338980  |

|   |           |           |           |
|---|-----------|-----------|-----------|
| H | -3.507420 | -4.199020 | 1.814070  |
| H | -4.637280 | -3.572950 | 0.925800  |
| C | -2.302280 | -3.076530 | -0.288310 |
| H | -2.979680 | -3.233460 | -0.950160 |
| H | -1.895700 | -3.912020 | -0.042800 |
| H | -1.634140 | -2.487790 | -0.647430 |
| C | -2.289830 | 3.411950  | -0.625590 |
| H | -3.148420 | 3.724840  | -0.913790 |
| H | -1.911820 | 2.845930  | -1.302390 |
| H | -1.708330 | 4.160030  | -0.472560 |
| H | 1.861770  | -0.054790 | -2.025300 |

## X-ray crystallography:

### [L<sup>Me</sup>Fe(CPh<sub>3</sub>)] (1)

A crystal (0.48 x 0.14 x 0.06 mm<sup>3</sup>) was placed onto the tip of a 0.1 mm diameter glass capillary tube or fiber and mounted on a Bruker SMART APEX II CCD Platform diffractometer for a data collection at 100.0(5) K.<sup>13</sup> A preliminary set of cell constants and an orientation matrix were calculated from reflections harvested from three orthogonal wedges of reciprocal space. The full data collection was carried out using MoK $\alpha$  radiation (graphite monochromator) with a frame time of 90 seconds and a detector distance of 3.99 cm. A randomly oriented region of reciprocal space was surveyed: six major sections of frames were collected with 0.50° steps in  $\omega$  at six different  $\phi$  settings and a detector position of -38° in  $2\theta$ . The intensity data were corrected for absorption.<sup>14</sup> Final cell constants were calculated from the xyz centroids of 4024 strong reflections from the actual data collection after integration.<sup>15</sup> See Table S-1 for additional crystal and refinement information.

The structure was solved using SIR97<sup>16</sup> and refined using SHELXL-97.<sup>17</sup> The space group  $P2_1/n$  was determined based on systematic absences and intensity statistics. A direct-methods solution was calculated which provided most non-hydrogen atoms from the E-map. Full-matrix least squares / difference Fourier cycles were performed which located the remaining non-hydrogen atoms. All non-hydrogen atoms were refined with anisotropic displacement parameters. All hydrogen atoms were placed in ideal positions and refined as riding atoms with relative isotropic displacement parameters. The final full matrix least squares refinement converged to  $R1 = 0.0502$  ( $F^2$ ,  $I > 2\sigma(I)$ ) and  $wR2 = 0.1307$  ( $F^2$ , all data).

The structure is the one suggested. The asymmetric unit contains one iron molecule and one-half molecule of cocrystallized diethyl ether solvent. The diethyl ether molecule is modeled as disordered over a special position. Unless noted otherwise all structural diagrams containing thermal displacement ellipsoids are drawn at the 50 % probability level.

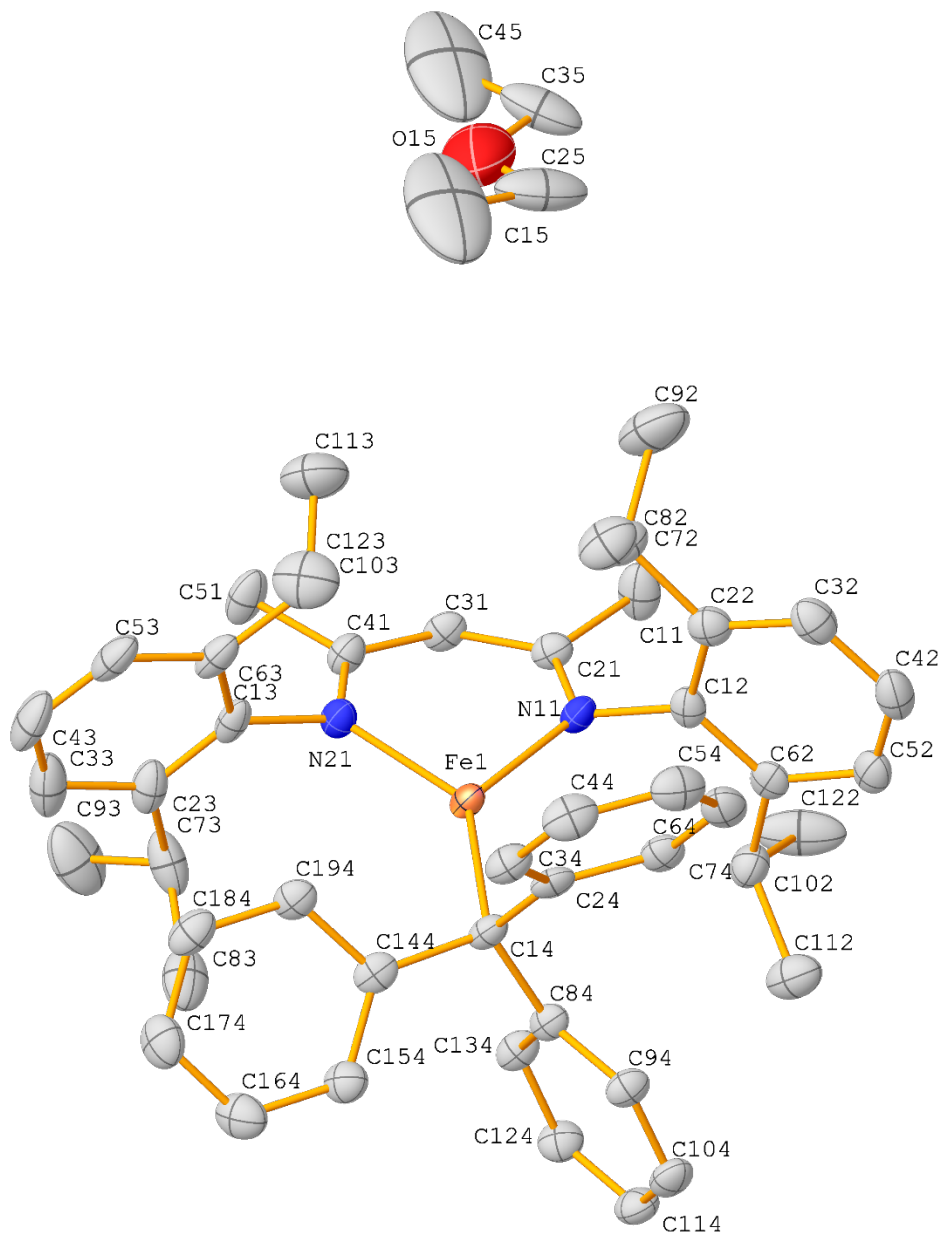

**Figure S-24:** The complete numbering scheme of  $L^{\text{Me}}\text{Fe}(\text{CPh}_3)$  (**1**) with 50% thermal ellipsoid probability levels. The hydrogen atoms are omitted for clarity.

Table S-1. Crystal data and structure refinement for L<sup>Me</sup>Fe(CPh<sub>3</sub>) (1).

|                                                     |                                                                    |                            |
|-----------------------------------------------------|--------------------------------------------------------------------|----------------------------|
| Identification code                                 | holkcm06                                                           |                            |
| CSD Deposition Number                               | 1944808                                                            |                            |
| Empirical formula                                   | C <sub>50</sub> H <sub>61</sub> Fe N <sub>2</sub> O <sub>0.5</sub> |                            |
| Formula weight                                      | 753.86                                                             |                            |
| Temperature                                         | 100.0(5) K                                                         |                            |
| Wavelength                                          | 0.71073 Å                                                          |                            |
| Crystal system                                      | Monoclinic                                                         |                            |
| Space group                                         | <i>P</i> 2 <sub>1</sub> / <i>n</i>                                 |                            |
| Unit cell dimensions                                | <i>a</i> = 19.946(4) Å                                             | $\alpha = 90^\circ$        |
|                                                     | <i>b</i> = 10.0572(18) Å                                           | $\beta = 108.414(4)^\circ$ |
|                                                     | <i>c</i> = 22.639(4) Å                                             | $\gamma = 90^\circ$        |
| Volume                                              | 4308.9(13) Å <sup>3</sup>                                          |                            |
| <i>Z</i>                                            | 4                                                                  |                            |
| Density (calculated)                                | 1.162 g/cm <sup>3</sup>                                            |                            |
| Absorption coefficient                              | 0.386 mm <sup>-1</sup>                                             |                            |
| <i>F</i> (000)                                      | 1620                                                               |                            |
| Crystal color, morphology                           | orange, needle                                                     |                            |
| Crystal size                                        | 0.48 x 0.14 x 0.06 mm <sup>3</sup>                                 |                            |
| Theta range for data collection                     | 1.90 to 24.99°                                                     |                            |
| Index ranges                                        | -23 ≤ <i>h</i> ≤ 23, -11 ≤ <i>k</i> ≤ 11, -26 ≤ <i>l</i> ≤ 26      |                            |
| Reflections collected                               | 57089                                                              |                            |
| Independent reflections                             | 7554 [ <i>R</i> (int) = 0.1431]                                    |                            |
| Observed reflections                                | 5083                                                               |                            |
| Completeness to theta = 24.99°                      | 99.7%                                                              |                            |
| Absorption correction                               | Multi-scan                                                         |                            |
| Max. and min. transmission                          | 0.9772 and 0.8364                                                  |                            |
| Refinement method                                   | Full-matrix least-squares on <i>F</i> <sup>2</sup>                 |                            |
| Data / restraints / parameters                      | 7554 / 5 / 509                                                     |                            |
| Goodness-of-fit on <i>F</i> <sup>2</sup>            | 1.008                                                              |                            |
| Final <i>R</i> indices [ <i>I</i> > 2σ( <i>I</i> )] | <i>R</i> 1 = 0.0502, <i>wR</i> 2 = 0.1124                          |                            |
| <i>R</i> indices (all data)                         | <i>R</i> 1 = 0.0891, <i>wR</i> 2 = 0.1307                          |                            |
| Largest diff. peak and hole                         | 0.522 and -0.321 e.Å <sup>-3</sup>                                 |                            |



Table S-2. Atomic coordinates ( $\times 10^4$ ) and equivalent isotropic displacement parameters ( $\text{\AA}^2 \times 10^3$ ) for  $\text{L}^{\text{Me}}\text{Fe}(\text{CPh}_3)$  (**1**).  $U_{\text{eq}}$  is defined as one third of the trace of the orthogonalized  $U_{ij}$  tensor.

|      | x       | y        | z       | $U_{\text{eq}}$ |
|------|---------|----------|---------|-----------------|
| Fe1  | 7166(1) | 2398(1)  | 4172(1) | 19(1)           |
| N21  | 6398(1) | 3723(2)  | 4137(1) | 23(1)           |
| N11  | 7948(1) | 3743(2)  | 4440(1) | 22(1)           |
| C31  | 7163(2) | 5628(3)  | 4207(1) | 25(1)           |
| C114 | 8035(2) | -318(3)  | 2473(2) | 30(1)           |
| C74  | 8350(2) | -7(3)    | 4875(1) | 26(1)           |
| C34  | 7327(2) | -1058(3) | 4989(1) | 30(1)           |
| C94  | 8009(2) | -899(3)  | 3496(1) | 25(1)           |
| C22  | 8821(2) | 3137(3)  | 5428(1) | 28(1)           |
| C144 | 6446(2) | -180(3)  | 3756(1) | 24(1)           |
| C12  | 8651(2) | 3288(3)  | 4779(1) | 23(1)           |
| C62  | 9141(2) | 2976(3)  | 4471(1) | 24(1)           |
| C13  | 5706(2) | 3311(3)  | 4140(2) | 26(1)           |
| C63  | 5620(2) | 2922(3)  | 4711(2) | 30(1)           |
| C23  | 5139(2) | 3291(3)  | 3586(2) | 33(1)           |
| C134 | 7357(2) | 975(3)   | 2974(1) | 26(1)           |
| C24  | 7623(2) | -258(3)  | 4627(1) | 23(1)           |
| C41  | 6507(2) | 5040(3)  | 4139(1) | 25(1)           |
| C21  | 7836(2) | 5051(3)  | 4397(1) | 23(1)           |
| C14  | 7200(2) | 328(3)   | 4000(1) | 23(1)           |
| C42  | 9968(2) | 2308(3)  | 5457(2) | 35(1)           |
| C154 | 6189(2) | -939(3)  | 3218(1) | 30(1)           |
| C174 | 5022(2) | -1013(4) | 3313(2) | 37(1)           |
| C64  | 8752(2) | -508(3)  | 5446(2) | 32(1)           |
| C84  | 7553(2) | 153(3)   | 3498(1) | 22(1)           |
| C32  | 9484(2) | 2645(3)  | 5757(2) | 33(1)           |
| C112 | 9196(2) | 1992(3)  | 3461(2) | 40(1)           |
| C103 | 6242(2) | 2905(3)  | 5308(2) | 34(1)           |
| C54  | 8445(2) | -1285(3) | 5797(2) | 37(1)           |
| C104 | 8249(2) | -1122(3) | 2993(2) | 29(1)           |
| C102 | 8984(2) | 3180(3)  | 3774(2) | 31(1)           |
| C124 | 7593(2) | 742(3)   | 2466(1) | 28(1)           |

|      |         |          |         |        |
|------|---------|----------|---------|--------|
| C43  | 4387(2) | 2535(4)  | 4175(2) | 46(1)  |
| C184 | 5272(2) | -283(3)  | 3860(2) | 33(1)  |
| C51  | 5905(2) | 5985(3)  | 4091(2) | 36(1)  |
| C11  | 8445(2) | 6006(3)  | 4584(2) | 39(1)  |
| C82  | 8176(2) | 2379(4)  | 6158(2) | 44(1)  |
| C72  | 8308(2) | 3522(3)  | 5775(2) | 34(1)  |
| C33  | 4476(2) | 2899(3)  | 3617(2) | 44(1)  |
| C194 | 5961(2) | 128(3)   | 4071(2) | 27(1)  |
| C44  | 7731(2) | -1558(3) | 5562(2) | 36(1)  |
| C164 | 5492(2) | -1349(4) | 2999(2) | 37(1)  |
| C83  | 5270(2) | 2317(4)  | 2613(2) | 46(1)  |
| C122 | 9352(3) | 4411(4)  | 3635(2) | 65(1)  |
| C73  | 5236(2) | 3604(4)  | 2961(2) | 42(1)  |
| C53  | 4950(2) | 2546(3)  | 4711(2) | 38(1)  |
| C52  | 9797(2) | 2489(3)  | 4823(2) | 30(1)  |
| C93  | 4668(2) | 4543(4)  | 2556(2) | 63(1)  |
| C123 | 6199(2) | 1792(4)  | 5749(2) | 54(1)  |
| C113 | 6353(2) | 4242(4)  | 5631(2) | 59(1)  |
| C92  | 8577(2) | 4740(4)  | 6186(2) | 65(1)  |
| C15  | 7319(8) | 4170(20) | 7697(7) | 168(8) |
| C25  | 7948(6) | 4984(10) | 7654(4) | 76(3)  |
| O15  | 7587(4) | 6180(9)  | 7405(4) | 118(3) |
| C35  | 8036(5) | 7321(9)  | 7402(4) | 63(3)  |
| C45  | 7478(8) | 8393(16) | 7215(7) | 168(8) |

---

Table S-3. Bond lengths [Å] and angles [°] for L<sup>Me</sup>Fe(CPh<sub>3</sub>) (**1**).

|               |          |               |          |
|---------------|----------|---------------|----------|
| Fe(1)-N(11)   | 2.008(2) | C(23)-C(33)   | 1.403(5) |
| Fe(1)-N(21)   | 2.013(2) | C(23)-C(73)   | 1.520(5) |
| Fe(1)-C(14)   | 2.123(3) | C(134)-C(124) | 1.392(4) |
| N(21)-C(41)   | 1.342(4) | C(134)-C(84)  | 1.396(4) |
| N(21)-C(13)   | 1.444(4) | C(134)-H(134) | 0.9500   |
| N(11)-C(21)   | 1.333(4) | C(24)-C(14)   | 1.524(4) |
| N(11)-C(12)   | 1.444(4) | C(41)-C(51)   | 1.508(4) |
| C(31)-C(21)   | 1.399(4) | C(21)-C(11)   | 1.501(4) |
| C(31)-C(41)   | 1.400(4) | C(14)-C(84)   | 1.525(4) |
| C(31)-H(31)   | 0.9500   | C(42)-C(52)   | 1.378(5) |
| C(114)-C(124) | 1.380(5) | C(42)-C(32)   | 1.387(5) |
| C(114)-C(104) | 1.380(4) | C(42)-H(42)   | 0.9500   |
| C(114)-H(114) | 0.9500   | C(154)-C(164) | 1.383(4) |
| C(74)-C(64)   | 1.383(4) | C(154)-H(154) | 0.9500   |
| C(74)-C(24)   | 1.403(4) | C(174)-C(164) | 1.387(5) |
| C(74)-H(74)   | 0.9500   | C(174)-C(184) | 1.389(5) |
| C(34)-C(44)   | 1.386(4) | C(174)-H(174) | 0.9500   |
| C(34)-C(24)   | 1.405(4) | C(64)-C(54)   | 1.387(5) |
| C(34)-H(34)   | 0.9500   | C(64)-H(64)   | 0.9500   |
| C(94)-C(104)  | 1.386(4) | C(32)-H(32)   | 0.9500   |
| C(94)-C(84)   | 1.396(4) | C(112)-C(102) | 1.517(5) |
| C(94)-H(94)   | 0.9500   | C(112)-H(11A) | 0.9800   |
| C(22)-C(32)   | 1.388(4) | C(112)-H(11B) | 0.9800   |
| C(22)-C(12)   | 1.407(4) | C(112)-H(11C) | 0.9800   |
| C(22)-C(72)   | 1.525(4) | C(103)-C(113) | 1.513(5) |
| C(144)-C(154) | 1.391(4) | C(103)-C(123) | 1.519(5) |
| C(144)-C(194) | 1.405(4) | C(103)-H(103) | 1.0000   |
| C(144)-C(14)  | 1.517(4) | C(54)-C(44)   | 1.382(5) |
| C(12)-C(62)   | 1.403(4) | C(54)-H(54)   | 0.9500   |
| C(62)-C(52)   | 1.389(4) | C(104)-H(104) | 0.9500   |
| C(62)-C(102)  | 1.522(4) | C(102)-C(122) | 1.521(5) |
| C(13)-C(23)   | 1.397(4) | C(102)-H(102) | 1.0000   |
| C(13)-C(63)   | 1.412(4) | C(124)-H(124) | 0.9500   |
| C(63)-C(53)   | 1.390(4) | C(43)-C(53)   | 1.368(5) |
| C(63)-C(103)  | 1.519(5) | C(43)-C(33)   | 1.380(5) |

|               |          |                      |            |
|---------------|----------|----------------------|------------|
| C(43)-H(43)   | 0.9500   | C(113)-H(11H)        | 0.9800     |
| C(184)-C(194) | 1.368(4) | C(113)-H(11I)        | 0.9800     |
| C(184)-H(184) | 0.9500   | C(92)-H(92A)         | 0.9800     |
| C(51)-H(51A)  | 0.9800   | C(92)-H(92B)         | 0.9800     |
| C(51)-H(51B)  | 0.9800   | C(92)-H(92C)         | 0.9800     |
| C(51)-H(51C)  | 0.9800   | C(15)-C(25)          | 1.524(9)   |
| C(11)-H(11D)  | 0.9800   | C(15)-H(15A)         | 0.9800     |
| C(11)-H(11E)  | 0.9800   | C(15)-H(15B)         | 0.9800     |
| C(11)-H(11F)  | 0.9800   | C(15)-H(15C)         | 0.9800     |
| C(82)-C(72)   | 1.511(5) | C(25)-O(15)          | 1.423(10)  |
| C(82)-H(82A)  | 0.9800   | C(25)-H(25A)         | 0.9900     |
| C(82)-H(82B)  | 0.9800   | C(25)-H(25B)         | 0.9900     |
| C(82)-H(82C)  | 0.9800   | O(15)-C(35)          | 1.457(10)  |
| C(72)-C(92)   | 1.530(5) | C(35)-C(45)          | 1.512(9)   |
| C(72)-H(72)   | 1.0000   | C(35)-H(35A)         | 0.9900     |
| C(33)-H(33)   | 0.9500   | C(35)-H(35B)         | 0.9900     |
| C(194)-H(194) | 0.9500   | C(45)-H(45A)         | 0.9800     |
| C(44)-H(44)   | 0.9500   | C(45)-H(45B)         | 0.9800     |
| C(164)-H(164) | 0.9500   | C(45)-H(45C)         | 0.9800     |
| C(83)-C(73)   | 1.528(5) | N(11)-Fe(1)-N(21)    | 94.29(10)  |
| C(83)-H(83A)  | 0.9800   | N(11)-Fe(1)-C(14)    | 130.49(11) |
| C(83)-H(83B)  | 0.9800   | N(21)-Fe(1)-C(14)    | 135.23(11) |
| C(83)-H(83C)  | 0.9800   | C(41)-N(21)-C(13)    | 116.0(2)   |
| C(122)-H(12A) | 0.9800   | C(41)-N(21)-Fe(1)    | 122.2(2)   |
| C(122)-H(12B) | 0.9800   | C(13)-N(21)-Fe(1)    | 121.77(19) |
| C(122)-H(12C) | 0.9800   | C(21)-N(11)-C(12)    | 117.7(2)   |
| C(73)-C(93)   | 1.537(5) | C(21)-N(11)-Fe(1)    | 123.1(2)   |
| C(73)-H(73)   | 1.0000   | C(12)-N(11)-Fe(1)    | 118.58(18) |
| C(53)-H(53)   | 0.9500   | C(21)-C(31)-C(41)    | 129.1(3)   |
| C(52)-H(52)   | 0.9500   | C(21)-C(31)-H(31)    | 115.4      |
| C(93)-H(93A)  | 0.9800   | C(41)-C(31)-H(31)    | 115.4      |
| C(93)-H(93B)  | 0.9800   | C(124)-C(114)-C(104) | 119.2(3)   |
| C(93)-H(93C)  | 0.9800   | C(124)-C(114)-H(114) | 120.4      |
| C(123)-H(12D) | 0.9800   | C(104)-C(114)-H(114) | 120.4      |
| C(123)-H(12E) | 0.9800   | C(64)-C(74)-C(24)    | 122.0(3)   |
| C(123)-H(12F) | 0.9800   | C(64)-C(74)-H(74)    | 119.0      |
| C(113)-H(11G) | 0.9800   | C(24)-C(74)-H(74)    | 119.0      |

|                      |          |                      |            |
|----------------------|----------|----------------------|------------|
| C(44)-C(34)-C(24)    | 121.8(3) | N(11)-C(21)-C(11)    | 120.5(3)   |
| C(44)-C(34)-H(34)    | 119.1    | C(31)-C(21)-C(11)    | 115.7(3)   |
| C(24)-C(34)-H(34)    | 119.1    | C(144)-C(14)-C(24)   | 113.7(2)   |
| C(104)-C(94)-C(84)   | 121.3(3) | C(144)-C(14)-C(84)   | 109.2(2)   |
| C(104)-C(94)-H(94)   | 119.4    | C(24)-C(14)-C(84)    | 113.6(2)   |
| C(84)-C(94)-H(94)    | 119.4    | C(144)-C(14)-Fe(1)   | 108.19(19) |
| C(32)-C(22)-C(12)    | 118.2(3) | C(24)-C(14)-Fe(1)    | 104.37(19) |
| C(32)-C(22)-C(72)    | 119.6(3) | C(84)-C(14)-Fe(1)    | 107.41(19) |
| C(12)-C(22)-C(72)    | 122.1(3) | C(52)-C(42)-C(32)    | 119.7(3)   |
| C(154)-C(144)-C(194) | 116.3(3) | C(52)-C(42)-H(42)    | 120.1      |
| C(154)-C(144)-C(14)  | 123.5(3) | C(32)-C(42)-H(42)    | 120.1      |
| C(194)-C(144)-C(14)  | 120.2(3) | C(164)-C(154)-C(144) | 121.9(3)   |
| C(62)-C(12)-C(22)    | 121.2(3) | C(164)-C(154)-H(154) | 119.1      |
| C(62)-C(12)-N(11)    | 121.2(3) | C(144)-C(154)-H(154) | 119.1      |
| C(22)-C(12)-N(11)    | 117.6(3) | C(164)-C(174)-C(184) | 118.3(3)   |
| C(52)-C(62)-C(12)    | 118.2(3) | C(164)-C(174)-H(174) | 120.8      |
| C(52)-C(62)-C(102)   | 119.3(3) | C(184)-C(174)-H(174) | 120.8      |
| C(12)-C(62)-C(102)   | 122.5(3) | C(74)-C(64)-C(54)    | 120.7(3)   |
| C(23)-C(13)-C(63)    | 121.3(3) | C(74)-C(64)-H(64)    | 119.6      |
| C(23)-C(13)-N(21)    | 120.3(3) | C(54)-C(64)-H(64)    | 119.6      |
| C(63)-C(13)-N(21)    | 118.4(3) | C(134)-C(84)-C(94)   | 117.0(3)   |
| C(53)-C(63)-C(13)    | 118.0(3) | C(134)-C(84)-C(14)   | 119.6(3)   |
| C(53)-C(63)-C(103)   | 120.8(3) | C(94)-C(84)-C(14)    | 123.0(3)   |
| C(13)-C(63)-C(103)   | 121.2(3) | C(42)-C(32)-C(22)    | 121.2(3)   |
| C(13)-C(23)-C(33)    | 117.9(3) | C(42)-C(32)-H(32)    | 119.4      |
| C(13)-C(23)-C(73)    | 121.8(3) | C(22)-C(32)-H(32)    | 119.4      |
| C(33)-C(23)-C(73)    | 120.1(3) | C(102)-C(112)-H(11A) | 109.5      |
| C(124)-C(134)-C(84)  | 121.6(3) | C(102)-C(112)-H(11B) | 109.5      |
| C(124)-C(134)-H(134) | 119.2    | H(11A)-C(112)-H(11B) | 109.5      |
| C(84)-C(134)-H(134)  | 119.2    | C(102)-C(112)-H(11C) | 109.5      |
| C(74)-C(24)-C(34)    | 116.1(3) | H(11A)-C(112)-H(11C) | 109.5      |
| C(74)-C(24)-C(14)    | 120.2(3) | H(11B)-C(112)-H(11C) | 109.5      |
| C(34)-C(24)-C(14)    | 123.7(3) | C(113)-C(103)-C(123) | 111.6(3)   |
| N(21)-C(41)-C(31)    | 124.2(3) | C(113)-C(103)-C(63)  | 111.9(3)   |
| N(21)-C(41)-C(51)    | 119.8(3) | C(123)-C(103)-C(63)  | 113.2(3)   |
| C(31)-C(41)-C(51)    | 115.9(3) | C(113)-C(103)-H(103) | 106.5      |
| N(11)-C(21)-C(31)    | 123.7(3) | C(123)-C(103)-H(103) | 106.5      |

|                      |          |                      |          |
|----------------------|----------|----------------------|----------|
| C(63)-C(103)-H(103)  | 106.5    | C(72)-C(82)-H(82C)   | 109.5    |
| C(44)-C(54)-C(64)    | 118.6(3) | H(82A)-C(82)-H(82C)  | 109.5    |
| C(44)-C(54)-H(54)    | 120.7    | H(82B)-C(82)-H(82C)  | 109.5    |
| C(64)-C(54)-H(54)    | 120.7    | C(82)-C(72)-C(22)    | 111.7(3) |
| C(114)-C(104)-C(94)  | 120.8(3) | C(82)-C(72)-C(92)    | 110.6(3) |
| C(114)-C(104)-H(104) | 119.6    | C(22)-C(72)-C(92)    | 110.6(3) |
| C(94)-C(104)-H(104)  | 119.6    | C(82)-C(72)-H(72)    | 107.9    |
| C(112)-C(102)-C(122) | 108.7(3) | C(22)-C(72)-H(72)    | 107.9    |
| C(112)-C(102)-C(62)  | 112.4(3) | C(92)-C(72)-H(72)    | 107.9    |
| C(122)-C(102)-C(62)  | 111.7(3) | C(43)-C(33)-C(23)    | 121.0(3) |
| C(112)-C(102)-H(102) | 107.9    | C(43)-C(33)-H(33)    | 119.5    |
| C(122)-C(102)-H(102) | 107.9    | C(23)-C(33)-H(33)    | 119.5    |
| C(62)-C(102)-H(102)  | 107.9    | C(184)-C(194)-C(144) | 122.1(3) |
| C(114)-C(124)-C(134) | 120.1(3) | C(184)-C(194)-H(194) | 118.9    |
| C(114)-C(124)-H(124) | 119.9    | C(144)-C(194)-H(194) | 118.9    |
| C(134)-C(124)-H(124) | 119.9    | C(54)-C(44)-C(34)    | 120.8(3) |
| C(53)-C(43)-C(33)    | 120.3(3) | C(54)-C(44)-H(44)    | 119.6    |
| C(53)-C(43)-H(43)    | 119.9    | C(34)-C(44)-H(44)    | 119.6    |
| C(33)-C(43)-H(43)    | 119.9    | C(154)-C(164)-C(174) | 120.7(3) |
| C(194)-C(184)-C(174) | 120.7(3) | C(154)-C(164)-H(164) | 119.7    |
| C(194)-C(184)-H(184) | 119.7    | C(174)-C(164)-H(164) | 119.7    |
| C(174)-C(184)-H(184) | 119.7    | C(73)-C(83)-H(83A)   | 109.5    |
| C(41)-C(51)-H(51A)   | 109.5    | C(73)-C(83)-H(83B)   | 109.5    |
| C(41)-C(51)-H(51B)   | 109.5    | H(83A)-C(83)-H(83B)  | 109.5    |
| H(51A)-C(51)-H(51B)  | 109.5    | C(73)-C(83)-H(83C)   | 109.5    |
| C(41)-C(51)-H(51C)   | 109.5    | H(83A)-C(83)-H(83C)  | 109.5    |
| H(51A)-C(51)-H(51C)  | 109.5    | H(83B)-C(83)-H(83C)  | 109.5    |
| H(51B)-C(51)-H(51C)  | 109.5    | C(102)-C(122)-H(12A) | 109.5    |
| C(21)-C(11)-H(11D)   | 109.5    | C(102)-C(122)-H(12B) | 109.5    |
| C(21)-C(11)-H(11E)   | 109.5    | H(12A)-C(122)-H(12B) | 109.5    |
| H(11D)-C(11)-H(11E)  | 109.5    | C(102)-C(122)-H(12C) | 109.5    |
| C(21)-C(11)-H(11F)   | 109.5    | H(12A)-C(122)-H(12C) | 109.5    |
| H(11D)-C(11)-H(11F)  | 109.5    | H(12B)-C(122)-H(12C) | 109.5    |
| H(11E)-C(11)-H(11F)  | 109.5    | C(23)-C(73)-C(83)    | 110.1(3) |
| C(72)-C(82)-H(82A)   | 109.5    | C(23)-C(73)-C(93)    | 113.4(3) |
| C(72)-C(82)-H(82B)   | 109.5    | C(83)-C(73)-C(93)    | 110.9(3) |
| H(82A)-C(82)-H(82B)  | 109.5    | C(23)-C(73)-H(73)    | 107.4    |

|                      |          |                     |          |
|----------------------|----------|---------------------|----------|
| C(83)-C(73)-H(73)    | 107.4    | C(72)-C(92)-H(92C)  | 109.5    |
| C(93)-C(73)-H(73)    | 107.4    | H(92A)-C(92)-H(92C) | 109.5    |
| C(43)-C(53)-C(63)    | 121.4(3) | H(92B)-C(92)-H(92C) | 109.5    |
| C(43)-C(53)-H(53)    | 119.3    | C(25)-C(15)-H(15A)  | 109.5    |
| C(63)-C(53)-H(53)    | 119.3    | C(25)-C(15)-H(15B)  | 109.5    |
| C(42)-C(52)-C(62)    | 121.5(3) | H(15A)-C(15)-H(15B) | 109.5    |
| C(42)-C(52)-H(52)    | 119.3    | C(25)-C(15)-H(15C)  | 109.5    |
| C(62)-C(52)-H(52)    | 119.3    | H(15A)-C(15)-H(15C) | 109.5    |
| C(73)-C(93)-H(93A)   | 109.5    | H(15B)-C(15)-H(15C) | 109.5    |
| C(73)-C(93)-H(93B)   | 109.5    | O(15)-C(25)-C(15)   | 98.9(11) |
| H(93A)-C(93)-H(93B)  | 109.5    | O(15)-C(25)-H(25A)  | 112.0    |
| C(73)-C(93)-H(93C)   | 109.5    | C(15)-C(25)-H(25A)  | 112.0    |
| H(93A)-C(93)-H(93C)  | 109.5    | O(15)-C(25)-H(25B)  | 112.0    |
| H(93B)-C(93)-H(93C)  | 109.5    | C(15)-C(25)-H(25B)  | 112.0    |
| C(103)-C(123)-H(12D) | 109.5    | H(25A)-C(25)-H(25B) | 109.7    |
| C(103)-C(123)-H(12E) | 109.5    | C(25)-O(15)-C(35)   | 115.7(8) |
| H(12D)-C(123)-H(12E) | 109.5    | O(15)-C(35)-C(45)   | 99.4(10) |
| C(103)-C(123)-H(12F) | 109.5    | O(15)-C(35)-H(35A)  | 111.9    |
| H(12D)-C(123)-H(12F) | 109.5    | C(45)-C(35)-H(35A)  | 111.9    |
| H(12E)-C(123)-H(12F) | 109.5    | O(15)-C(35)-H(35B)  | 111.9    |
| C(103)-C(113)-H(11G) | 109.5    | C(45)-C(35)-H(35B)  | 111.9    |
| C(103)-C(113)-H(11H) | 109.5    | H(35A)-C(35)-H(35B) | 109.6    |
| H(11G)-C(113)-H(11H) | 109.5    | C(35)-C(45)-H(45A)  | 109.5    |
| C(103)-C(113)-H(11I) | 109.5    | C(35)-C(45)-H(45B)  | 109.5    |
| H(11G)-C(113)-H(11I) | 109.5    | H(45A)-C(45)-H(45B) | 109.5    |
| H(11H)-C(113)-H(11I) | 109.5    | C(35)-C(45)-H(45C)  | 109.5    |
| C(72)-C(92)-H(92A)   | 109.5    | H(45A)-C(45)-H(45C) | 109.5    |
| C(72)-C(92)-H(92B)   | 109.5    | H(45B)-C(45)-H(45C) | 109.5    |
| H(92A)-C(92)-H(92B)  | 109.5    |                     |          |

---

Table S-4. Anisotropic displacement parameters ( $\text{\AA}^2 \times 10^3$ ) for  $\text{L}^{\text{M}}\text{Fe}(\text{CPh}_3)$  (**1**). The anisotropic displacement factor exponent takes the form:  $-2\pi^2[ h^2 a^{*2}U_{11} + \dots + 2 h k a^* b^* U_{12} ]$

|      | $U_{11}$ | $U_{22}$ | $U_{33}$ | $U_{23}$ | $U_{13}$ | $U_{12}$ |
|------|----------|----------|----------|----------|----------|----------|
| Fe1  | 20(1)    | 16(1)    | 26(1)    | -1(1)    | 12(1)    | 0(1)     |
| N21  | 21(1)    | 19(1)    | 31(1)    | -1(1)    | 11(1)    | -3(1)    |
| N11  | 22(1)    | 19(1)    | 28(1)    | -1(1)    | 13(1)    | 2(1)     |
| C31  | 32(2)    | 13(2)    | 33(2)    | 2(1)     | 16(1)    | 0(1)     |
| C114 | 32(2)    | 33(2)    | 30(2)    | -7(2)    | 17(2)    | -3(2)    |
| C74  | 32(2)    | 16(2)    | 32(2)    | -3(1)    | 14(2)    | 0(1)     |
| C34  | 36(2)    | 26(2)    | 32(2)    | 0(2)     | 19(2)    | 1(2)     |
| C94  | 31(2)    | 19(2)    | 29(2)    | 1(1)     | 14(1)    | 2(1)     |
| C22  | 31(2)    | 22(2)    | 30(2)    | -2(1)    | 10(1)    | -3(2)    |
| C144 | 32(2)    | 17(2)    | 30(2)    | 5(1)     | 16(2)    | 0(1)     |
| C12  | 20(2)    | 15(2)    | 33(2)    | 0(1)     | 7(1)     | -3(1)    |
| C62  | 23(2)    | 15(2)    | 34(2)    | -5(1)    | 10(1)    | -8(1)    |
| C13  | 22(2)    | 14(2)    | 49(2)    | -2(1)    | 20(2)    | 0(1)     |
| C63  | 33(2)    | 18(2)    | 51(2)    | -3(2)    | 29(2)    | 0(1)     |
| C23  | 22(2)    | 24(2)    | 54(2)    | 5(2)     | 15(2)    | 1(2)     |
| C134 | 30(2)    | 19(2)    | 32(2)    | 2(1)     | 17(1)    | 1(1)     |
| C24  | 33(2)    | 15(2)    | 26(2)    | -3(1)    | 15(1)    | 3(1)     |
| C41  | 25(2)    | 22(2)    | 32(2)    | 2(1)     | 13(1)    | 4(1)     |
| C21  | 28(2)    | 18(2)    | 28(2)    | -2(1)    | 14(1)    | -4(1)    |
| C14  | 26(2)    | 18(2)    | 29(2)    | -3(1)    | 16(1)    | 0(1)     |
| C42  | 24(2)    | 26(2)    | 48(2)    | -1(2)    | 3(2)     | 0(2)     |
| C154 | 31(2)    | 30(2)    | 32(2)    | -2(2)    | 16(2)    | -5(2)    |
| C174 | 30(2)    | 43(2)    | 42(2)    | 4(2)     | 15(2)    | -10(2)   |
| C64  | 34(2)    | 22(2)    | 38(2)    | -5(2)    | 8(2)     | 1(2)     |
| C84  | 24(2)    | 17(2)    | 29(2)    | -2(1)    | 14(1)    | -4(1)    |
| C32  | 33(2)    | 27(2)    | 35(2)    | 1(2)     | 5(2)     | -4(2)    |
| C112 | 50(2)    | 32(2)    | 48(2)    | -7(2)    | 29(2)    | -8(2)    |
| C103 | 45(2)    | 28(2)    | 39(2)    | -2(2)    | 28(2)    | -5(2)    |
| C54  | 50(2)    | 29(2)    | 31(2)    | 4(2)     | 12(2)    | 8(2)     |
| C104 | 31(2)    | 20(2)    | 41(2)    | -7(2)    | 17(2)    | 1(2)     |
| C102 | 25(2)    | 33(2)    | 37(2)    | -3(2)    | 14(2)    | 0(2)     |
| C124 | 34(2)    | 28(2)    | 27(2)    | 2(1)     | 14(1)    | -2(2)    |



|      |         |         |       |        |       |         |
|------|---------|---------|-------|--------|-------|---------|
| C43  | 31(2)   | 35(2)   | 84(3) | -1(2)  | 37(2) | 0(2)    |
| C184 | 38(2)   | 27(2)   | 42(2) | 3(2)   | 25(2) | 2(2)    |
| C51  | 30(2)   | 19(2)   | 66(2) | 4(2)   | 25(2) | 5(2)    |
| C11  | 29(2)   | 21(2)   | 65(2) | 3(2)   | 12(2) | -4(2)   |
| C82  | 57(2)   | 38(2)   | 50(2) | 6(2)   | 33(2) | 1(2)    |
| C72  | 39(2)   | 37(2)   | 30(2) | 4(2)   | 17(2) | 8(2)    |
| C33  | 23(2)   | 30(2)   | 75(3) | 7(2)   | 10(2) | 3(2)    |
| C194 | 31(2)   | 18(2)   | 35(2) | -1(1)  | 16(2) | -3(1)   |
| C44  | 52(2)   | 30(2)   | 33(2) | 7(2)   | 22(2) | 3(2)    |
| C164 | 41(2)   | 39(2)   | 36(2) | -4(2)  | 18(2) | -14(2)  |
| C83  | 34(2)   | 68(3)   | 36(2) | 17(2)  | 10(2) | 5(2)    |
| C122 | 131(4)  | 29(2)   | 45(2) | -3(2)  | 41(3) | -17(3)  |
| C73  | 24(2)   | 43(2)   | 51(2) | 16(2)  | 0(2)  | -8(2)   |
| C53  | 38(2)   | 27(2)   | 61(2) | -8(2)  | 36(2) | -2(2)   |
| C52  | 23(2)   | 25(2)   | 44(2) | -7(2)  | 11(1) | -7(2)   |
| C93  | 52(3)   | 47(3)   | 70(3) | 17(2)  | -9(2) | 1(2)    |
| C123 | 70(3)   | 51(3)   | 49(2) | 5(2)   | 29(2) | -12(2)  |
| C113 | 76(3)   | 46(3)   | 58(3) | -17(2) | 27(2) | -3(2)   |
| C92  | 83(3)   | 42(3)   | 89(3) | -20(2) | 53(3) | -4(2)   |
| C15  | 114(9)  | 340(20) | 43(5) | 30(9)  | 14(5) | -29(11) |
| C25  | 138(10) | 51(6)   | 34(5) | -9(4)  | 21(5) | 5(6)    |
| O15  | 90(6)   | 185(11) | 81(5) | -50(6) | 29(5) | 14(7)   |
| C35  | 99(8)   | 53(6)   | 29(4) | -4(4)  | 6(4)  | -31(6)  |
| C45  | 114(9)  | 340(20) | 43(5) | 30(9)  | 14(5) | -29(11) |

---

Table S-5. Hydrogen coordinates ( $\times 10^4$ ) and isotropic displacement parameters ( $\text{\AA}^2 \times 10^3$ ) for  $\text{L}^{\text{Me}}\text{Fe}(\text{CPh}_3)$  (**1**).

|      | x     | y     | z    | U(eq) |
|------|-------|-------|------|-------|
| H31  | 7150  | 6549  | 4110 | 30    |
| H114 | 8189  | -492  | 2124 | 36    |
| H74  | 8573  | 522   | 4644 | 31    |
| H34  | 6838  | -1262 | 4838 | 35    |
| H94  | 8158  | -1473 | 3847 | 30    |
| H134 | 7055  | 1711  | 2963 | 31    |
| H42  | 10416 | 1953  | 5687 | 42    |
| H154 | 6501  | -1182 | 2995 | 36    |
| H174 | 4540  | -1275 | 3159 | 45    |
| H64  | 9243  | -319  | 5599 | 38    |
| H32  | 9608  | 2537  | 6195 | 40    |
| H11A | 9712  | 1905  | 3605 | 60    |
| H11B | 9029  | 2118  | 3009 | 60    |
| H11C | 8985  | 1184  | 3568 | 60    |
| H103 | 6673  | 2728  | 5185 | 41    |
| H54  | 8720  | -1622 | 6191 | 44    |
| H104 | 8565  | -1836 | 3006 | 35    |
| H102 | 8463  | 3310  | 3585 | 37    |
| H124 | 7450  | 1314  | 2115 | 34    |
| H43  | 3934  | 2276  | 4187 | 55    |
| H184 | 4962  | -66   | 4089 | 39    |
| H51A | 5542  | 5876  | 3685 | 54    |
| H51B | 6081  | 6901  | 4134 | 54    |
| H51C | 5701  | 5791  | 4422 | 54    |
| H11D | 8862  | 5556  | 4861 | 58    |
| H11E | 8324  | 6766  | 4801 | 58    |
| H11F | 8548  | 6317  | 4211 | 58    |
| H82A | 7951  | 1646  | 5881 | 67    |
| H82B | 7864  | 2675  | 6391 | 67    |
| H82C | 8626  | 2077  | 6449 | 67    |
| H72  | 7847  | 3763  | 5459 | 41    |

|      |       |       |      |     |
|------|-------|-------|------|-----|
| H33  | 4082  | 2884  | 3247 | 53  |
| H194 | 6117  | 637   | 4443 | 32  |
| H44  | 7514  | -2095 | 5795 | 44  |
| H164 | 5335  | -1866 | 2630 | 45  |
| H83A | 5649  | 1752  | 2873 | 69  |
| H83B | 5364  | 2527  | 2224 | 69  |
| H83C | 4817  | 1848  | 2519 | 69  |
| H12A | 9176  | 5201  | 3792 | 98  |
| H12B | 9254  | 4492  | 3184 | 98  |
| H12C | 9862  | 4331  | 3839 | 98  |
| H73  | 5702  | 4061  | 3047 | 51  |
| H53  | 4880  | 2292  | 5091 | 45  |
| H52  | 10136 | 2276  | 4622 | 36  |
| H93A | 4207  | 4100  | 2439 | 95  |
| H93B | 4784  | 4777  | 2180 | 95  |
| H93C | 4650  | 5353  | 2792 | 95  |
| H12D | 5816  | 1978  | 5922 | 82  |
| H12E | 6648  | 1733  | 6089 | 82  |
| H12F | 6107  | 948   | 5522 | 82  |
| H11G | 6406  | 4928  | 5341 | 88  |
| H11H | 6781  | 4213  | 5994 | 88  |
| H11I | 5945  | 4452  | 5767 | 88  |
| H92A | 9028  | 4526  | 6502 | 98  |
| H92B | 8231  | 4996  | 6391 | 98  |
| H92C | 8645  | 5478  | 5929 | 98  |
| H15A | 7482  | 3296  | 7873 | 252 |
| H15B | 6977  | 4067  | 7281 | 252 |
| H15C | 7094  | 4635  | 7966 | 252 |
| H25A | 8303  | 5125  | 8068 | 91  |
| H25B | 8176  | 4572  | 7369 | 91  |
| H35A | 8290  | 7218  | 7093 | 76  |
| H35B | 8381  | 7490  | 7818 | 76  |
| H45A | 7702  | 9250  | 7191 | 252 |
| H45B | 7229  | 8447  | 7525 | 252 |
| H45C | 7140  | 8178  | 6807 | 252 |

---

Table S-6. Torsion angles [°] for L<sup>Me</sup>Fe(CPh<sub>3</sub>) (1).

|                  |           |                     |             |
|------------------|-----------|---------------------|-------------|
| N11-Fe1-N21-C41  | 15.0(2)   | C44-C34-C24-C14     | -179.2(3)   |
| C14-Fe1-N21-C41  | -164.9(2) | C13-N21-C41-C31     | 172.6(3)    |
| N11-Fe1-N21-C13  | -161.9(2) | Fe1-N21-C41-C31     | -4.6(4)     |
| C14-Fe1-N21-C13  | 18.1(3)   | C13-N21-C41-C51     | -4.9(4)     |
| N21-Fe1-N11-C21  | -15.3(2)  | Fe1-N21-C41-C51     | 178.0(2)    |
| C14-Fe1-N11-C21  | 164.6(2)  | C21-C31-C41-N21     | -13.2(5)    |
| N21-Fe1-N11-C12  | 155.0(2)  | C21-C31-C41-C51     | 164.4(3)    |
| C14-Fe1-N11-C12  | -25.0(3)  | C12-N11-C21-C31     | -165.5(3)   |
| C32-C22-C12-C62  | -1.2(4)   | Fe1-N11-C21-C31     | 4.9(4)      |
| C72-C22-C12-C62  | 177.6(3)  | C12-N11-C21-C11     | 11.8(4)     |
| C32-C22-C12-N11  | 177.2(3)  | Fe1-N11-C21-C11     | -177.8(2)   |
| C72-C22-C12-N11  | -4.1(4)   | C41-C31-C21-N11     | 13.0(5)     |
| C21-N11-C12-C62  | -95.5(3)  | C41-C31-C21-C11     | -164.5(3)   |
| Fe1-N11-C12-C62  | 93.6(3)   | C154-C144-C14-C24   | -115.2(3)   |
| C21-N11-C12-C22  | 86.1(3)   | C194-C144-C14-C24   | 65.9(4)     |
| Fe1-N11-C12-C22  | -84.7(3)  | C154-C144-C14-C84   | 12.7(4)     |
| C22-C12-C62-C52  | 1.1(4)    | C194-C144-C14-C84   | -166.1(3)   |
| N11-C12-C62-C52  | -177.2(3) | C154-C144-C14-Fe1   | 129.4(3)    |
| C22-C12-C62-C102 | -177.5(3) | C194-C144-C14-Fe1   | -49.5(3)    |
| N11-C12-C62-C102 | 4.1(4)    | C74-C24-C14-C144    | 172.3(3)    |
| C41-N21-C13-C23  | 81.1(4)   | C34-C24-C14-C144    | -7.8(4)     |
| Fe1-N21-C13-C23  | -101.8(3) | C74-C24-C14-C84     | 46.6(4)     |
| C41-N21-C13-C63  | -99.4(3)  | C34-C24-C14-C84     | -133.5(3)   |
| Fe1-N21-C13-C63  | 77.8(3)   | C74-C24-C14-Fe1     | -70.1(3)    |
| C23-C13-C63-C53  | -1.4(5)   | C34-C24-C14-Fe1     | 109.8(3)    |
| N21-C13-C63-C53  | 179.0(3)  | N11-Fe1-C14-C144    | -175.31(16) |
| C23-C13-C63-C103 | 178.1(3)  | N21-Fe1-C14-C144    | 4.6(3)      |
| N21-C13-C63-C103 | -1.4(4)   | N11-Fe1-C14-C24     | 63.3(2)     |
| C63-C13-C23-C33  | 1.3(5)    | N21-Fe1-C14-C24     | -116.8(2)   |
| N21-C13-C23-C33  | -179.2(3) | N11-Fe1-C14-C84     | -57.5(2)    |
| C63-C13-C23-C73  | -175.2(3) | N21-Fe1-C14-C84     | 122.4(2)    |
| N21-C13-C23-C73  | 4.3(5)    | C194-C144-C154-C164 | 1.1(5)      |
| C64-C74-C24-C34  | -0.6(4)   | C14-C144-C154-C164  | -177.8(3)   |
| C64-C74-C24-C14  | 179.3(3)  | C24-C74-C64-C54     | 0.0(5)      |
| C44-C34-C24-C74  | 0.7(4)    | C124-C134-C84-C94   | 1.3(4)      |

|                     |           |                     |           |
|---------------------|-----------|---------------------|-----------|
| C124-C134-C84-C14   | -171.3(3) | C24-C34-C44-C54     | -0.1(5)   |
| C104-C94-C84-C134   | -0.7(4)   | C144-C154-C164-C174 | 0.0(5)    |
| C104-C94-C84-C14    | 171.7(3)  | C184-C174-C164-C154 | -1.5(5)   |
| C144-C14-C84-C134   | 72.2(3)   | C13-C23-C73-C83     | 100.0(4)  |
| C24-C14-C84-C134    | -159.7(3) | C33-C23-C73-C83     | -76.5(4)  |
| Fe1-C14-C84-C134    | -44.9(3)  | C13-C23-C73-C93     | -135.1(3) |
| C144-C14-C84-C94    | -99.9(3)  | C33-C23-C73-C93     | 48.5(5)   |
| C24-C14-C84-C94     | 28.1(4)   | C33-C43-C53-C63     | 0.1(6)    |
| Fe1-C14-C84-C94     | 143.0(3)  | C13-C63-C53-C43     | 0.7(5)    |
| C52-C42-C32-C22     | 1.4(5)    | C103-C63-C53-C43    | -178.9(3) |
| C12-C22-C32-C42     | -0.1(5)   | C32-C42-C52-C62     | -1.5(5)   |
| C72-C22-C32-C42     | -178.9(3) | C12-C62-C52-C42     | 0.3(5)    |
| C53-C63-C103-C113   | -93.3(4)  | C102-C62-C52-C42    | 178.9(3)  |
| C13-C63-C103-C113   | 87.2(4)   | C15-C25-O15-C35     | 168.9(9)  |
| C53-C63-C103-C123   | 33.9(4)   | C25-O15-C35-C45     | -171.1(9) |
| C13-C63-C103-C123   | -145.7(3) |                     |           |
| C74-C64-C54-C44     | 0.6(5)    |                     |           |
| C124-C114-C104-C94  | 2.0(5)    |                     |           |
| C84-C94-C104-C114   | -1.0(5)   |                     |           |
| C52-C62-C102-C112   | 47.1(4)   |                     |           |
| C12-C62-C102-C112   | -134.3(3) |                     |           |
| C52-C62-C102-C122   | -75.4(4)  |                     |           |
| C12-C62-C102-C122   | 103.2(4)  |                     |           |
| C104-C114-C124-C134 | -1.4(5)   |                     |           |
| C84-C134-C124-C114  | -0.3(5)   |                     |           |
| C164-C174-C184-C194 | 2.0(5)    |                     |           |
| C32-C22-C72-C82     | -55.9(4)  |                     |           |
| C12-C22-C72-C82     | 125.4(3)  |                     |           |
| C32-C22-C72-C92     | 67.8(4)   |                     |           |
| C12-C22-C72-C92     | -110.9(4) |                     |           |
| C53-C43-C33-C23     | -0.2(6)   |                     |           |
| C13-C23-C33-C43     | -0.5(5)   |                     |           |
| C73-C23-C33-C43     | 176.1(3)  |                     |           |
| C174-C184-C194-C144 | -1.0(5)   |                     |           |
| C154-C144-C194-C184 | -0.6(5)   |                     |           |
| C14-C144-C194-C184  | 178.4(3)  |                     |           |
| C64-C54-C44-C34     | -0.5(5)   |                     |           |

---

### [L<sup>Me</sup>Fe(Ph<sub>2</sub>CO)] (2)

A crystal (0.28 x 0.12 x 0.05 mm<sup>3</sup>) was placed onto the tip of a 0.1 mm diameter glass capillary tube or fiber and mounted on a Bruker SMART APEX II CCD platform diffractometer for a data collection at 100.0(5) K.<sup>13</sup> A preliminary set of cell constants and an orientation matrix were calculated from reflections harvested from three orthogonal wedges of reciprocal space. The full data collection was carried out using MoK $\alpha$  radiation (graphite monochromator) with a frame time of 90 seconds and a detector distance of 4.00 cm. A randomly oriented region of reciprocal space was surveyed: three major sections of frames were collected with 0.50° steps in  $\omega$  at three different  $\phi$  settings and a detector position of -38° in  $2\theta$ . The intensity data were corrected for absorption.<sup>14</sup> Final cell constants were calculated from the xyz centroids of 2904 strong reflections from the actual data collection after integration.<sup>15</sup> See Table S-7 for additional crystal and refinement information.

The structure was solved using SIR2011<sup>16</sup> and refined using SHELXL-2013.<sup>17</sup> The space group *C2/c* was determined based on systematic absences and intensity statistics. A direct-methods solution was calculated which provided most non-hydrogen atoms from the E-map. Full-matrix least squares / difference Fourier cycles were performed which located the remaining non-hydrogen atoms. All non-hydrogen atoms were refined with anisotropic displacement parameters. All hydrogen atoms were placed in ideal positions and refined as riding atoms with relative isotropic displacement parameters. The final full matrix least squares refinement converged to  $R1 = 0.0655$  ( $F^2$ ,  $I > 2\sigma(I)$ ) and  $wR^2 = 0.1579$  ( $F^2$ , all data).

The asymmetric unit contains one iron molecule in a general position and one cocrystallized *n*-hexane solvent molecule in a crystallographic inversion center. The unique portion of the latter is modeled as disordered over two general positions (71:29).

Unless noted otherwise all structural diagrams containing thermal displacement ellipsoids are drawn at the 50 % probability level.

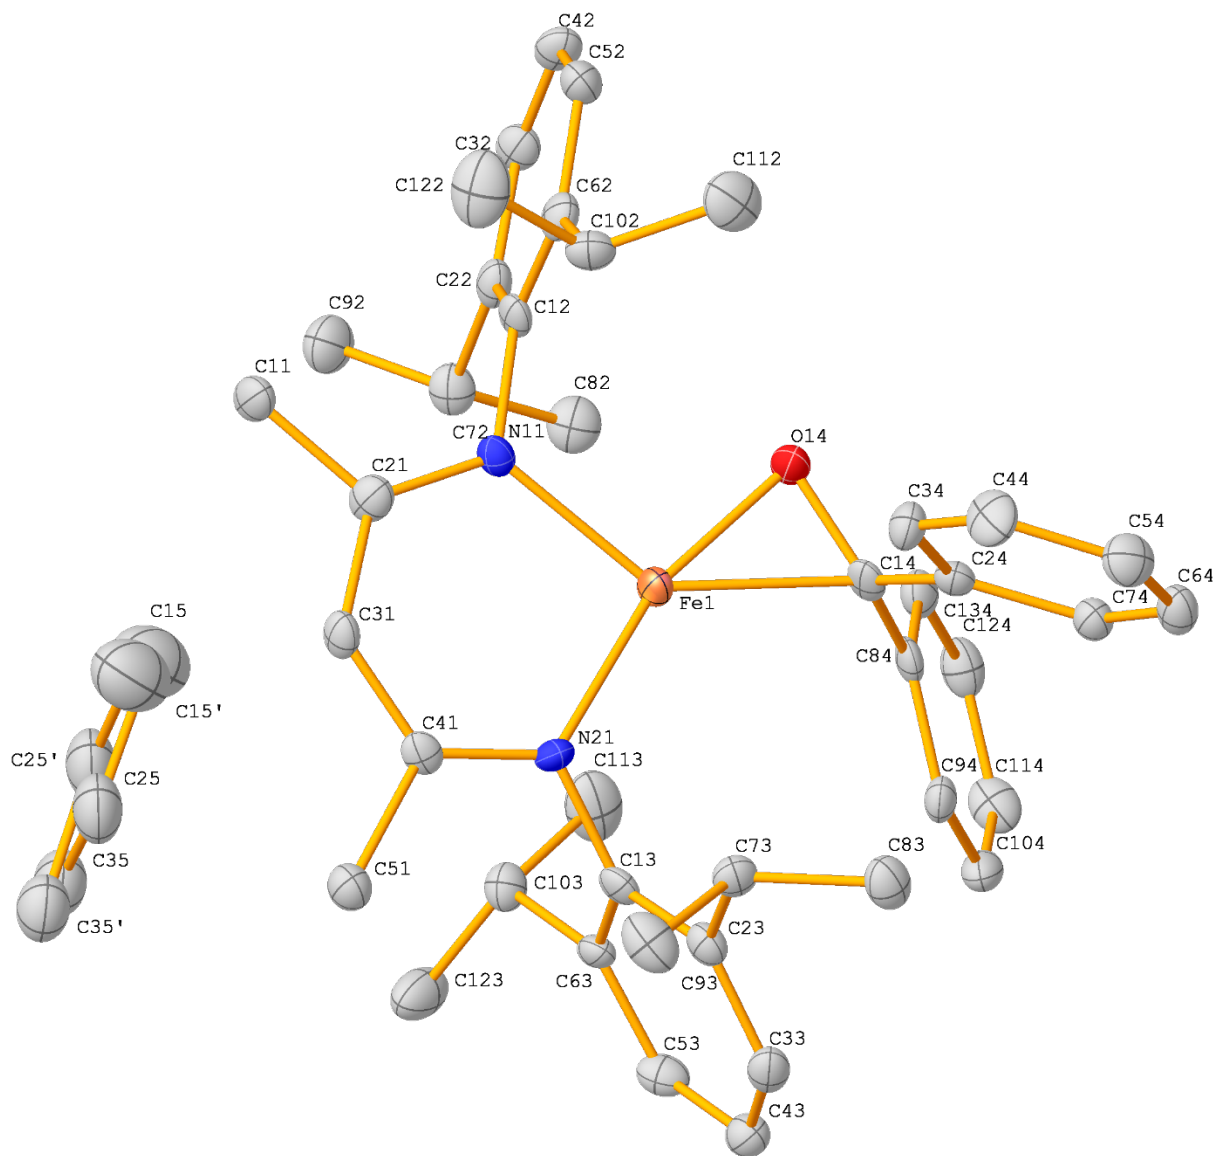

**Figure S-25:** The complete numbering scheme of  $L^{\text{Me}}\text{Fe}(\text{Ph}_2\text{CO})$  (**2**) with 50% thermal ellipsoid probability levels. The hydrogen atoms are omitted for clarity.

Table S-7. Crystal data and structure refinement for L<sup>Me</sup>Fe(Ph<sub>2</sub>CO) (**2**).

|                                                     |                                                               |                            |
|-----------------------------------------------------|---------------------------------------------------------------|----------------------------|
| Identification code                                 | holkcm09                                                      |                            |
| CSD Deposition Number                               | 1944809                                                       |                            |
| Empirical formula                                   | C <sub>45</sub> H <sub>58</sub> Fe N <sub>2</sub> O           |                            |
| Formula weight                                      | 698.78                                                        |                            |
| Temperature                                         | 100.0(5) K                                                    |                            |
| Wavelength                                          | 0.71073 Å                                                     |                            |
| Crystal system                                      | monoclinic                                                    |                            |
| Space group                                         | C2/c                                                          |                            |
| Unit cell dimensions                                | $a = 39.564(5) \text{ \AA}$                                   | $\alpha = 90^\circ$        |
|                                                     | $b = 11.3678(13) \text{ \AA}$                                 | $\beta = 107.263(2)^\circ$ |
|                                                     | $c = 17.931(2) \text{ \AA}$                                   | $\gamma = 90^\circ$        |
| Volume                                              | 7701.2(16) Å <sup>3</sup>                                     |                            |
| Z                                                   | 8                                                             |                            |
| Density (calculated)                                | 1.205 g/cm <sup>3</sup>                                       |                            |
| Absorption coefficient                              | 0.428 mm <sup>-1</sup>                                        |                            |
| <i>F</i> (000)                                      | 3008                                                          |                            |
| Crystal color, morphology                           | orange, plate                                                 |                            |
| Crystal size                                        | 0.28 x 0.12 x 0.05 mm <sup>3</sup>                            |                            |
| Theta range for data collection                     | 1.078 to 25.086°                                              |                            |
| Index ranges                                        | -46 ≤ <i>h</i> ≤ 46, -13 ≤ <i>k</i> ≤ 12, -21 ≤ <i>l</i> ≤ 21 |                            |
| Reflections collected                               | 29328                                                         |                            |
| Independent reflections                             | 6852 [ <i>R</i> (int) = 0.1658]                               |                            |
| Observed reflections                                | 3906                                                          |                            |
| Completeness to theta = 25.030°                     | 100.0%                                                        |                            |
| Absorption correction                               | Multi-scan                                                    |                            |
| Max. and min. transmission                          | 0.7452 and 0.5466                                             |                            |
| Refinement method                                   | Full-matrix least-squares on <i>F</i> <sup>2</sup>            |                            |
| Data / restraints / parameters                      | 6852 / 4 / 464                                                |                            |
| Goodness-of-fit on <i>F</i> <sup>2</sup>            | 1.026                                                         |                            |
| Final <i>R</i> indices [ <i>I</i> > 2σ( <i>I</i> )] | <i>R</i> 1 = 0.0655, <i>wR</i> 2 = 0.1235                     |                            |
| <i>R</i> indices (all data)                         | <i>R</i> 1 = 0.1381, <i>wR</i> 2 = 0.1579                     |                            |
| Largest diff. peak and hole                         | 0.426 and -0.450 e.Å <sup>-3</sup>                            |                            |



Table S-8. Atomic coordinates ( $\times 10^4$ ) and equivalent isotropic displacement parameters ( $\text{\AA}^2 \times 10^3$ ) for **2**.  $U_{\text{eq}}$  is defined as one third of the trace of the orthogonalized  $U_{ij}$  tensor.

|      | x       | y        | z        | $U_{\text{eq}}$ |
|------|---------|----------|----------|-----------------|
| Fe1  | 3564(1) | 1298(1)  | 1246(1)  | 17(1)           |
| O14  | 3490(1) | 888(3)   | 2175(2)  | 21(1)           |
| N11  | 3400(1) | 2971(3)  | 1181(2)  | 16(1)           |
| N21  | 3714(1) | 1284(3)  | 307(2)   | 16(1)           |
| C11  | 3286(1) | 4903(4)  | 562(3)   | 25(1)           |
| C21  | 3393(1) | 3644(4)  | 567(2)   | 22(1)           |
| C31  | 3496(1) | 3245(4)  | -72(2)   | 20(1)           |
| C41  | 3652(1) | 2194(4)  | -188(2)  | 17(1)           |
| C51  | 3773(1) | 2128(4)  | -909(3)  | 25(1)           |
| C12  | 3311(1) | 3477(4)  | 1837(2)  | 18(1)           |
| C22  | 3581(1) | 4010(4)  | 2435(3)  | 21(1)           |
| C32  | 3488(1) | 4455(4)  | 3074(2)  | 22(1)           |
| C42  | 3151(1) | 4397(4)  | 3116(3)  | 25(1)           |
| C52  | 2890(1) | 3852(4)  | 2532(3)  | 25(1)           |
| C62  | 2967(1) | 3382(4)  | 1883(3)  | 22(1)           |
| C72  | 3961(1) | 4079(4)  | 2424(3)  | 23(1)           |
| C82  | 4191(1) | 3212(4)  | 3012(3)  | 30(1)           |
| C92  | 4112(1) | 5318(4)  | 2571(3)  | 33(1)           |
| C102 | 2675(1) | 2755(4)  | 1263(3)  | 22(1)           |
| C112 | 2487(1) | 1836(4)  | 1611(3)  | 33(1)           |
| C122 | 2403(2) | 3635(5)  | 777(3)   | 42(2)           |
| C13  | 3930(1) | 328(4)   | 186(2)   | 18(1)           |
| C23  | 3769(1) | -729(4)  | -158(3)  | 20(1)           |
| C33  | 3988(1) | -1633(4) | -257(2)  | 22(1)           |
| C43  | 4353(1) | -1521(4) | -14(3)   | 23(1)           |
| C53  | 4504(1) | -487(4)  | 331(3)   | 22(1)           |
| C63  | 4298(1) | 454(4)   | 429(2)   | 18(1)           |
| C73  | 3374(1) | -901(4)  | -422(3)  | 20(1)           |
| C83  | 3270(1) | -2114(4) | -188(3)  | 26(1)           |
| C93  | 3224(1) | -753(5)  | -1304(3) | 33(1)           |
| C103 | 4475(1) | 1576(4)  | 826(3)   | 22(1)           |
| C113 | 4576(2) | 1439(5)  | 1706(3)  | 39(2)           |

|      |         |          |         |       |
|------|---------|----------|---------|-------|
| C123 | 4799(1) | 1915(4)  | 577(3)  | 36(1) |
| C14  | 3579(1) | -172(4)  | 1939(2) | 19(1) |
| C24  | 3285(1) | -1033(4) | 1682(2) | 18(1) |
| C34  | 2950(1) | -700(4)  | 1218(3) | 23(1) |
| C44  | 2673(1) | -1490(4) | 1012(3) | 30(1) |
| C54  | 2725(1) | -2638(4) | 1286(3) | 28(1) |
| C64  | 3052(1) | -2980(4) | 1756(3) | 24(1) |
| C74  | 3330(1) | -2199(4) | 1956(3) | 21(1) |
| C84  | 3944(1) | -591(4)  | 2296(2) | 18(1) |
| C94  | 4103(1) | -1398(4) | 1924(2) | 19(1) |
| C104 | 4441(1) | -1786(4) | 2274(3) | 25(1) |
| C114 | 4630(1) | -1388(5) | 3008(3) | 28(1) |
| C124 | 4479(1) | -580(4)  | 3381(3) | 26(1) |
| C134 | 4140(1) | -168(4)  | 3038(3) | 22(1) |
| C15  | 4385(3) | 5200(20) | 816(9)  | 65(5) |
| C25  | 4527(2) | 4944(7)  | 123(5)  | 44(2) |
| C35  | 4925(2) | 5157(8)  | 328(4)  | 41(2) |
| C15' | 4310(8) | 5210(70) | 550(30) | 65(5) |
| C25' | 4711(6) | 5369(17) | 676(11) | 44(2) |
| C35' | 4803(2) | 5050(20) | -78(11) | 41(2) |

---

Table S-9. Bond lengths [Å] and angles [°] for **2**.

|              |          |               |          |
|--------------|----------|---------------|----------|
| Fe(1)-O(14)  | 1.836(3) | C(82)-H(82B)  | 0.9800   |
| Fe(1)-N(21)  | 1.945(4) | C(82)-H(82C)  | 0.9800   |
| Fe(1)-N(11)  | 2.001(4) | C(92)-H(92A)  | 0.9800   |
| Fe(1)-C(14)  | 2.073(4) | C(92)-H(92B)  | 0.9800   |
| O(14)-C(14)  | 1.358(5) | C(92)-H(92C)  | 0.9800   |
| N(11)-C(21)  | 1.335(5) | C(102)-C(112) | 1.520(7) |
| N(11)-C(12)  | 1.443(5) | C(102)-C(122) | 1.535(7) |
| N(21)-C(41)  | 1.337(5) | C(102)-H(10A) | 1.0000   |
| N(21)-C(13)  | 1.440(5) | C(112)-H(11D) | 0.9800   |
| C(11)-C(21)  | 1.492(6) | C(112)-H(11E) | 0.9800   |
| C(11)-H(11A) | 0.9800   | C(112)-H(11F) | 0.9800   |
| C(11)-H(11B) | 0.9800   | C(122)-H(12A) | 0.9800   |
| C(11)-H(11C) | 0.9800   | C(122)-H(12B) | 0.9800   |
| C(21)-C(31)  | 1.400(6) | C(122)-H(12C) | 0.9800   |
| C(31)-C(41)  | 1.390(6) | C(13)-C(63)   | 1.399(7) |
| C(31)-H(31A) | 0.9500   | C(13)-C(23)   | 1.413(6) |
| C(41)-C(51)  | 1.507(6) | C(23)-C(33)   | 1.389(6) |
| C(51)-H(51A) | 0.9800   | C(23)-C(73)   | 1.506(6) |
| C(51)-H(51B) | 0.9800   | C(33)-C(43)   | 1.385(7) |
| C(51)-H(51C) | 0.9800   | C(33)-H(33A)  | 0.9500   |
| C(12)-C(62)  | 1.393(7) | C(43)-C(53)   | 1.380(6) |
| C(12)-C(22)  | 1.407(6) | C(43)-H(43A)  | 0.9500   |
| C(22)-C(32)  | 1.398(6) | C(53)-C(63)   | 1.386(6) |
| C(22)-C(72)  | 1.511(7) | C(53)-H(53A)  | 0.9500   |
| C(32)-C(42)  | 1.361(7) | C(63)-C(103)  | 1.525(6) |
| C(32)-H(32A) | 0.9500   | C(73)-C(93)   | 1.524(6) |
| C(42)-C(52)  | 1.380(6) | C(73)-C(83)   | 1.533(6) |
| C(42)-H(42A) | 0.9500   | C(73)-H(73A)  | 1.0000   |
| C(52)-C(62)  | 1.395(6) | C(83)-H(83A)  | 0.9800   |
| C(52)-H(52A) | 0.9500   | C(83)-H(83B)  | 0.9800   |
| C(62)-C(102) | 1.523(6) | C(83)-H(83C)  | 0.9800   |
| C(72)-C(92)  | 1.523(6) | C(93)-H(93A)  | 0.9800   |
| C(72)-C(82)  | 1.530(6) | C(93)-H(93B)  | 0.9800   |
| C(72)-H(72A) | 1.0000   | C(93)-H(93C)  | 0.9800   |
| C(82)-H(82A) | 0.9800   | C(103)-C(113) | 1.517(6) |

|               |           |                     |            |
|---------------|-----------|---------------------|------------|
| C(103)-C(123) | 1.527(7)  | C(25)-H(25A)        | 0.9900     |
| C(103)-H(10B) | 1.0000    | C(25)-H(25B)        | 0.9900     |
| C(113)-H(11G) | 0.9800    | C(35)-C(35)#1       | 1.507(13)  |
| C(113)-H(11H) | 0.9800    | C(35)-H(35A)        | 0.9900     |
| C(113)-H(11I) | 0.9800    | C(35)-H(35B)        | 0.9900     |
| C(123)-H(12D) | 0.9800    | C(15')-C(25')       | 1.55(2)    |
| C(123)-H(12E) | 0.9800    | C(15')-H(15D)       | 0.9800     |
| C(123)-H(12F) | 0.9800    | C(15')-H(15E)       | 0.9800     |
| C(14)-C(84)   | 1.474(7)  | C(15')-H(15F)       | 0.9800     |
| C(14)-C(24)   | 1.483(6)  | C(25')-C(35')       | 1.542(17)  |
| C(24)-C(34)   | 1.392(6)  | C(25')-H(25C)       | 0.9900     |
| C(24)-C(74)   | 1.407(6)  | C(25')-H(25D)       | 0.9900     |
| C(34)-C(44)   | 1.379(7)  | C(35')-C(35')#1     | 1.504(15)  |
| C(34)-H(34A)  | 0.9500    | C(35')-H(35C)       | 0.9900     |
| C(44)-C(54)   | 1.388(7)  | C(35')-H(35D)       | 0.9900     |
| C(44)-H(44A)  | 0.9500    | O(14)-Fe(1)-N(21)   | 162.96(15) |
| C(54)-C(64)   | 1.375(7)  | O(14)-Fe(1)-N(11)   | 99.05(14)  |
| C(54)-H(54A)  | 0.9500    | N(21)-Fe(1)-N(11)   | 97.73(15)  |
| C(64)-C(74)   | 1.376(6)  | O(14)-Fe(1)-C(14)   | 40.10(15)  |
| C(64)-H(64A)  | 0.9500    | N(21)-Fe(1)-C(14)   | 123.42(17) |
| C(74)-H(74A)  | 0.9500    | N(11)-Fe(1)-C(14)   | 138.75(16) |
| C(84)-C(94)   | 1.389(6)  | C(14)-O(14)-Fe(1)   | 79.4(2)    |
| C(84)-C(134)  | 1.412(6)  | C(21)-N(11)-C(12)   | 119.5(4)   |
| C(94)-C(104)  | 1.373(6)  | C(21)-N(11)-Fe(1)   | 121.3(3)   |
| C(94)-H(94A)  | 0.9500    | C(12)-N(11)-Fe(1)   | 119.0(3)   |
| C(104)-C(114) | 1.383(6)  | C(41)-N(21)-C(13)   | 118.9(4)   |
| C(104)-H(10C) | 0.9500    | C(41)-N(21)-Fe(1)   | 121.8(3)   |
| C(114)-C(124) | 1.374(7)  | C(13)-N(21)-Fe(1)   | 119.0(3)   |
| C(114)-H(11J) | 0.9500    | C(21)-C(11)-H(11A)  | 109.5      |
| C(124)-C(134) | 1.379(7)  | C(21)-C(11)-H(11B)  | 109.5      |
| C(124)-H(12G) | 0.9500    | H(11A)-C(11)-H(11B) | 109.5      |
| C(134)-H(13A) | 0.9500    | C(21)-C(11)-H(11C)  | 109.5      |
| C(15)-C(25)   | 1.536(13) | H(11A)-C(11)-H(11C) | 109.5      |
| C(15)-H(15A)  | 0.9800    | H(11B)-C(11)-H(11C) | 109.5      |
| C(15)-H(15B)  | 0.9800    | N(11)-C(21)-C(31)   | 123.3(4)   |
| C(15)-H(15C)  | 0.9800    | N(11)-C(21)-C(11)   | 119.4(4)   |
| C(25)-C(35)   | 1.527(10) | C(31)-C(21)-C(11)   | 117.2(4)   |

|                     |          |                      |          |
|---------------------|----------|----------------------|----------|
| C(41)-C(31)-C(21)   | 130.7(4) | C(72)-C(82)-H(82B)   | 109.5    |
| C(41)-C(31)-H(31A)  | 114.7    | H(82A)-C(82)-H(82B)  | 109.5    |
| C(21)-C(31)-H(31A)  | 114.7    | C(72)-C(82)-H(82C)   | 109.5    |
| N(21)-C(41)-C(31)   | 124.5(4) | H(82A)-C(82)-H(82C)  | 109.5    |
| N(21)-C(41)-C(51)   | 119.3(4) | H(82B)-C(82)-H(82C)  | 109.5    |
| C(31)-C(41)-C(51)   | 116.1(4) | C(72)-C(92)-H(92A)   | 109.5    |
| C(41)-C(51)-H(51A)  | 109.5    | C(72)-C(92)-H(92B)   | 109.5    |
| C(41)-C(51)-H(51B)  | 109.5    | H(92A)-C(92)-H(92B)  | 109.5    |
| H(51A)-C(51)-H(51B) | 109.5    | C(72)-C(92)-H(92C)   | 109.5    |
| C(41)-C(51)-H(51C)  | 109.5    | H(92A)-C(92)-H(92C)  | 109.5    |
| H(51A)-C(51)-H(51C) | 109.5    | H(92B)-C(92)-H(92C)  | 109.5    |
| H(51B)-C(51)-H(51C) | 109.5    | C(112)-C(102)-C(62)  | 112.4(4) |
| C(62)-C(12)-C(22)   | 121.6(4) | C(112)-C(102)-C(122) | 109.6(4) |
| C(62)-C(12)-N(11)   | 119.7(4) | C(62)-C(102)-C(122)  | 111.2(4) |
| C(22)-C(12)-N(11)   | 118.7(4) | C(112)-C(102)-H(10A) | 107.9    |
| C(32)-C(22)-C(12)   | 117.1(5) | C(62)-C(102)-H(10A)  | 107.9    |
| C(32)-C(22)-C(72)   | 119.8(4) | C(122)-C(102)-H(10A) | 107.9    |
| C(12)-C(22)-C(72)   | 123.0(4) | C(102)-C(112)-H(11D) | 109.5    |
| C(42)-C(32)-C(22)   | 122.0(4) | C(102)-C(112)-H(11E) | 109.5    |
| C(42)-C(32)-H(32A)  | 119.0    | H(11D)-C(112)-H(11E) | 109.5    |
| C(22)-C(32)-H(32A)  | 119.0    | C(102)-C(112)-H(11F) | 109.5    |
| C(32)-C(42)-C(52)   | 120.3(4) | H(11D)-C(112)-H(11F) | 109.5    |
| C(32)-C(42)-H(42A)  | 119.8    | H(11E)-C(112)-H(11F) | 109.5    |
| C(52)-C(42)-H(42A)  | 119.8    | C(102)-C(122)-H(12A) | 109.5    |
| C(42)-C(52)-C(62)   | 120.4(5) | C(102)-C(122)-H(12B) | 109.5    |
| C(42)-C(52)-H(52A)  | 119.8    | H(12A)-C(122)-H(12B) | 109.5    |
| C(62)-C(52)-H(52A)  | 119.8    | C(102)-C(122)-H(12C) | 109.5    |
| C(12)-C(62)-C(52)   | 118.6(4) | H(12A)-C(122)-H(12C) | 109.5    |
| C(12)-C(62)-C(102)  | 122.5(4) | H(12B)-C(122)-H(12C) | 109.5    |
| C(52)-C(62)-C(102)  | 118.8(4) | C(63)-C(13)-C(23)    | 121.1(4) |
| C(22)-C(72)-C(92)   | 112.8(4) | C(63)-C(13)-N(21)    | 119.1(4) |
| C(22)-C(72)-C(82)   | 110.3(4) | C(23)-C(13)-N(21)    | 119.7(4) |
| C(92)-C(72)-C(82)   | 110.7(4) | C(33)-C(23)-C(13)    | 117.8(4) |
| C(22)-C(72)-H(72A)  | 107.6    | C(33)-C(23)-C(73)    | 119.5(4) |
| C(92)-C(72)-H(72A)  | 107.6    | C(13)-C(23)-C(73)    | 122.7(4) |
| C(82)-C(72)-H(72A)  | 107.6    | C(43)-C(33)-C(23)    | 121.6(4) |
| C(72)-C(82)-H(82A)  | 109.5    | C(43)-C(33)-H(33A)   | 119.2    |

|                      |          |                      |          |
|----------------------|----------|----------------------|----------|
| C(23)-C(33)-H(33A)   | 119.2    | C(103)-C(113)-H(11I) | 109.5    |
| C(53)-C(43)-C(33)    | 119.5(4) | H(11G)-C(113)-H(11I) | 109.5    |
| C(53)-C(43)-H(43A)   | 120.3    | H(11H)-C(113)-H(11I) | 109.5    |
| C(33)-C(43)-H(43A)   | 120.3    | C(103)-C(123)-H(12D) | 109.5    |
| C(43)-C(53)-C(63)    | 121.5(5) | C(103)-C(123)-H(12E) | 109.5    |
| C(43)-C(53)-H(53A)   | 119.3    | H(12D)-C(123)-H(12E) | 109.5    |
| C(63)-C(53)-H(53A)   | 119.3    | C(103)-C(123)-H(12F) | 109.5    |
| C(53)-C(63)-C(13)    | 118.5(4) | H(12D)-C(123)-H(12F) | 109.5    |
| C(53)-C(63)-C(103)   | 120.0(4) | H(12E)-C(123)-H(12F) | 109.5    |
| C(13)-C(63)-C(103)   | 121.5(4) | O(14)-C(14)-C(84)    | 117.6(4) |
| C(23)-C(73)-C(93)    | 111.0(4) | O(14)-C(14)-C(24)    | 115.5(4) |
| C(23)-C(73)-C(83)    | 111.7(4) | C(84)-C(14)-C(24)    | 119.8(4) |
| C(93)-C(73)-C(83)    | 109.3(4) | O(14)-C(14)-Fe(1)    | 60.5(2)  |
| C(23)-C(73)-H(73A)   | 108.2    | C(84)-C(14)-Fe(1)    | 111.8(3) |
| C(93)-C(73)-H(73A)   | 108.2    | C(24)-C(14)-Fe(1)    | 117.8(3) |
| C(83)-C(73)-H(73A)   | 108.2    | C(34)-C(24)-C(74)    | 117.6(4) |
| C(73)-C(83)-H(83A)   | 109.5    | C(34)-C(24)-C(14)    | 121.7(4) |
| C(73)-C(83)-H(83B)   | 109.5    | C(74)-C(24)-C(14)    | 120.5(4) |
| H(83A)-C(83)-H(83B)  | 109.5    | C(44)-C(34)-C(24)    | 121.6(4) |
| C(73)-C(83)-H(83C)   | 109.5    | C(44)-C(34)-H(34A)   | 119.2    |
| H(83A)-C(83)-H(83C)  | 109.5    | C(24)-C(34)-H(34A)   | 119.2    |
| H(83B)-C(83)-H(83C)  | 109.5    | C(34)-C(44)-C(54)    | 119.7(5) |
| C(73)-C(93)-H(93A)   | 109.5    | C(34)-C(44)-H(44A)   | 120.2    |
| C(73)-C(93)-H(93B)   | 109.5    | C(54)-C(44)-H(44A)   | 120.2    |
| H(93A)-C(93)-H(93B)  | 109.5    | C(64)-C(54)-C(44)    | 119.7(5) |
| C(73)-C(93)-H(93C)   | 109.5    | C(64)-C(54)-H(54A)   | 120.1    |
| H(93A)-C(93)-H(93C)  | 109.5    | C(44)-C(54)-H(54A)   | 120.1    |
| H(93B)-C(93)-H(93C)  | 109.5    | C(54)-C(64)-C(74)    | 120.8(4) |
| C(113)-C(103)-C(63)  | 110.0(4) | C(54)-C(64)-H(64A)   | 119.6    |
| C(113)-C(103)-C(123) | 110.3(4) | C(74)-C(64)-H(64A)   | 119.6    |
| C(63)-C(103)-C(123)  | 112.5(4) | C(64)-C(74)-C(24)    | 120.6(5) |
| C(113)-C(103)-H(10B) | 108.0    | C(64)-C(74)-H(74A)   | 119.7    |
| C(63)-C(103)-H(10B)  | 108.0    | C(24)-C(74)-H(74A)   | 119.7    |
| C(123)-C(103)-H(10B) | 108.0    | C(94)-C(84)-C(134)   | 118.4(4) |
| C(103)-C(113)-H(11G) | 109.5    | C(94)-C(84)-C(14)    | 122.0(4) |
| C(103)-C(113)-H(11H) | 109.5    | C(134)-C(84)-C(14)   | 119.6(4) |
| H(11G)-C(113)-H(11H) | 109.5    | C(104)-C(94)-C(84)   | 120.8(4) |

|                      |          |                        |           |
|----------------------|----------|------------------------|-----------|
| C(104)-C(94)-H(94A)  | 119.6    | H(15E)-C(15')-H(15F)   | 109.5     |
| C(84)-C(94)-H(94A)   | 119.6    | C(35')-C(25')-C(15')   | 109.9(19) |
| C(94)-C(104)-C(114)  | 120.6(5) | C(35')-C(25')-H(25C)   | 109.7     |
| C(94)-C(104)-H(10C)  | 119.7    | C(15')-C(25')-H(25C)   | 109.7     |
| C(114)-C(104)-H(10C) | 119.7    | C(35')-C(25')-H(25D)   | 109.7     |
| C(124)-C(114)-C(104) | 119.4(5) | C(15')-C(25')-H(25D)   | 109.7     |
| C(124)-C(114)-H(11J) | 120.3    | H(25C)-C(25')-H(25D)   | 108.2     |
| C(104)-C(114)-H(11J) | 120.3    | C(35')#1-C(35')-C(25') | 110.9(19) |
| C(114)-C(124)-C(134) | 121.1(5) | C(35')#1-C(35')-H(35C) | 109.5     |
| C(114)-C(124)-H(12G) | 119.5    | C(25')-C(35')-H(35C)   | 109.5     |
| C(134)-C(124)-H(12G) | 119.5    | C(35')#1-C(35')-H(35D) | 109.5     |
| C(124)-C(134)-C(84)  | 119.7(5) | C(25')-C(35')-H(35D)   | 109.5     |
| C(124)-C(134)-H(13A) | 120.2    | H(35C)-C(35')-H(35D)   | 108.1     |
| C(84)-C(134)-H(13A)  | 120.2    |                        |           |
| C(25)-C(15)-H(15A)   | 109.5    |                        |           |
| C(25)-C(15)-H(15B)   | 109.5    |                        |           |
| H(15A)-C(15)-H(15B)  | 109.5    |                        |           |
| C(25)-C(15)-H(15C)   | 109.5    |                        |           |
| H(15A)-C(15)-H(15C)  | 109.5    |                        |           |
| H(15B)-C(15)-H(15C)  | 109.5    |                        |           |
| C(35)-C(25)-C(15)    | 112.1(8) |                        |           |
| C(35)-C(25)-H(25A)   | 109.2    |                        |           |
| C(15)-C(25)-H(25A)   | 109.2    |                        |           |
| C(35)-C(25)-H(25B)   | 109.2    |                        |           |
| C(15)-C(25)-H(25B)   | 109.2    |                        |           |
| H(25A)-C(25)-H(25B)  | 107.9    |                        |           |
| C(35)#1-C(35)-C(25)  | 113.0(9) |                        |           |
| C(35)#1-C(35)-H(35A) | 109.0    |                        |           |
| C(25)-C(35)-H(35A)   | 109.0    |                        |           |
| C(35)#1-C(35)-H(35B) | 109.0    |                        |           |
| C(25)-C(35)-H(35B)   | 109.0    |                        |           |
| H(35A)-C(35)-H(35B)  | 107.8    |                        |           |
| C(25')-C(15')-H(15D) | 109.5    |                        |           |
| C(25')-C(15')-H(15E) | 109.5    |                        |           |
| H(15D)-C(15')-H(15E) | 109.5    |                        |           |
| C(25')-C(15')-H(15F) | 109.5    |                        |           |
| H(15D)-C(15')-H(15F) | 109.5    |                        |           |

---

Symmetry transformations used to generate equivalent atoms:

#1  $-x+1,-y+1,-z$



Table S-10. Anisotropic displacement parameters ( $\text{\AA}^2 \times 10^3$ ) for **2**. The anisotropic displacement factor exponent takes the form:  $-2\pi^2 [ h^2 a^{*2} U_{11} + \dots + 2 h k a^* b^* U_{12} ]$

|      | $U_{11}$ | $U_{22}$ | $U_{33}$ | $U_{23}$ | $U_{13}$ | $U_{12}$ |
|------|----------|----------|----------|----------|----------|----------|
| Fe1  | 25(1)    | 15(1)    | 13(1)    | 1(1)     | 7(1)     | 1(1)     |
| O14  | 33(2)    | 17(2)    | 15(2)    | 0(1)     | 11(2)    | 2(1)     |
| N11  | 19(2)    | 17(2)    | 11(2)    | 0(2)     | 4(2)     | -2(2)    |
| N21  | 20(2)    | 14(2)    | 18(2)    | -1(2)    | 8(2)     | 4(2)     |
| C11  | 40(3)    | 22(3)    | 16(2)    | 5(2)     | 12(2)    | 7(2)     |
| C21  | 30(3)    | 21(3)    | 14(2)    | 1(2)     | 4(2)     | 4(2)     |
| C31  | 30(3)    | 17(3)    | 12(2)    | 3(2)     | 5(2)     | 0(2)     |
| C41  | 20(3)    | 18(3)    | 11(2)    | -3(2)    | 3(2)     | -5(2)    |
| C51  | 32(3)    | 22(3)    | 21(3)    | 2(2)     | 11(2)    | 1(2)     |
| C12  | 30(3)    | 16(3)    | 10(2)    | 3(2)     | 8(2)     | 0(2)     |
| C22  | 33(3)    | 14(3)    | 15(2)    | 2(2)     | 6(2)     | 0(2)     |
| C32  | 30(3)    | 21(3)    | 13(2)    | 0(2)     | 5(2)     | 2(2)     |
| C42  | 41(3)    | 20(3)    | 15(2)    | -3(2)    | 10(2)    | 4(2)     |
| C52  | 36(3)    | 20(3)    | 24(3)    | 2(2)     | 17(2)    | 1(2)     |
| C62  | 30(3)    | 16(3)    | 19(2)    | 5(2)     | 6(2)     | 5(2)     |
| C72  | 27(3)    | 23(3)    | 17(2)    | -1(2)    | 3(2)     | -3(2)    |
| C82  | 29(3)    | 30(3)    | 28(3)    | 0(2)     | 5(3)     | -1(2)    |
| C92  | 39(3)    | 23(3)    | 39(3)    | -2(2)    | 15(3)    | -6(2)    |
| C102 | 27(3)    | 23(3)    | 20(3)    | -4(2)    | 10(2)    | 1(2)     |
| C112 | 35(3)    | 31(3)    | 34(3)    | -8(2)    | 10(3)    | -12(3)   |
| C122 | 47(4)    | 39(3)    | 31(3)    | 4(3)     | -4(3)    | -4(3)    |
| C13  | 26(3)    | 22(3)    | 11(2)    | 3(2)     | 10(2)    | 2(2)     |
| C23  | 24(3)    | 21(3)    | 15(2)    | 3(2)     | 8(2)     | 0(2)     |
| C33  | 35(3)    | 17(3)    | 16(2)    | -2(2)    | 9(2)     | -1(2)    |
| C43  | 28(3)    | 21(3)    | 21(2)    | 2(2)     | 10(2)    | 4(2)     |
| C53  | 18(3)    | 30(3)    | 19(3)    | -1(2)    | 6(2)     | 2(2)     |
| C63  | 24(3)    | 18(3)    | 14(2)    | 3(2)     | 11(2)    | 5(2)     |
| C73  | 26(3)    | 17(3)    | 19(2)    | -4(2)    | 8(2)     | -1(2)    |
| C83  | 34(3)    | 23(3)    | 22(3)    | -2(2)    | 9(2)     | -7(2)    |
| C93  | 29(3)    | 42(3)    | 27(3)    | 3(2)     | 8(3)     | -6(3)    |
| C103 | 23(3)    | 19(3)    | 24(3)    | 1(2)     | 7(2)     | -2(2)    |
| C113 | 51(4)    | 33(3)    | 29(3)    | -6(2)    | 6(3)     | -15(3)   |

|      |       |       |        |         |       |        |
|------|-------|-------|--------|---------|-------|--------|
| C123 | 35(3) | 23(3) | 57(4)  | -6(3)   | 23(3) | -3(3)  |
| C14  | 34(3) | 18(3) | 9(2)   | 0(2)    | 10(2) | -2(2)  |
| C24  | 24(3) | 17(3) | 15(2)  | -1(2)   | 10(2) | 1(2)   |
| C34  | 29(3) | 15(3) | 24(3)  | 4(2)    | 9(2)  | 2(2)   |
| C44  | 24(3) | 32(3) | 30(3)  | 11(2)   | 4(2)  | 11(2)  |
| C54  | 27(3) | 27(3) | 31(3)  | -2(2)   | 10(3) | -5(2)  |
| C64  | 39(3) | 19(3) | 17(2)  | 1(2)    | 10(2) | -1(2)  |
| C74  | 28(3) | 18(3) | 18(2)  | 1(2)    | 10(2) | 1(2)   |
| C84  | 27(3) | 15(2) | 12(2)  | 5(2)    | 7(2)  | -3(2)  |
| C94  | 27(3) | 12(2) | 19(2)  | 3(2)    | 8(2)  | -1(2)  |
| C104 | 27(3) | 19(3) | 33(3)  | 5(2)    | 18(3) | 5(2)   |
| C114 | 20(3) | 36(3) | 25(3)  | 6(2)    | 4(2)  | 1(2)   |
| C124 | 29(3) | 27(3) | 20(3)  | 4(2)    | 3(2)  | -7(2)  |
| C134 | 28(3) | 16(3) | 22(3)  | 1(2)    | 10(2) | -4(2)  |
| C15  | 78(9) | 61(6) | 69(13) | -12(11) | 39(9) | -15(7) |
| C25  | 62(6) | 31(5) | 43(5)  | 9(3)    | 20(5) | -2(4)  |
| C35  | 55(6) | 31(4) | 38(6)  | 5(5)    | 14(5) | 0(4)   |
| C15' | 78(9) | 61(6) | 69(13) | -12(11) | 39(9) | -15(7) |
| C25' | 62(6) | 31(5) | 43(5)  | 9(3)    | 20(5) | -2(4)  |
| C35' | 55(6) | 31(4) | 38(6)  | 5(5)    | 14(5) | 0(4)   |

---

Table S-11. Hydrogen coordinates ( $\times 10^4$ ) and isotropic displacement parameters ( $\text{\AA}^2 \times 10^3$ ) for  $[\text{L}^{\text{Me}}\text{Fe}(\text{Ph}_2\text{CO})]$  (**2**).

|      | x    | y     | z     | U(eq) |
|------|------|-------|-------|-------|
| H11A | 3064 | 4957  | 698   | 38    |
| H11B | 3251 | 5234  | 40    | 38    |
| H11C | 3471 | 5344  | 944   | 38    |
| H31A | 3450 | 3781  | -497  | 24    |
| H51A | 3696 | 1382  | -1179 | 37    |
| H51B | 4032 | 2177  | -759  | 37    |
| H51C | 3671 | 2784  | -1258 | 37    |
| H32A | 3666 | 4810  | 3491  | 26    |
| H42A | 3095 | 4733  | 3550  | 30    |
| H52A | 2657 | 3797  | 2573  | 30    |
| H72A | 3967 | 3835  | 1892  | 28    |
| H82A | 4099 | 2413  | 2884  | 45    |
| H82B | 4185 | 3417  | 3539  | 45    |
| H82C | 4435 | 3251  | 2989  | 45    |
| H92A | 3973 | 5847  | 2164  | 50    |
| H92B | 4359 | 5313  | 2561  | 50    |
| H92C | 4103 | 5591  | 3083  | 50    |
| H10A | 2786 | 2343  | 902   | 27    |
| H11D | 2661 | 1295  | 1939  | 50    |
| H11E | 2321 | 1394  | 1189  | 50    |
| H11F | 2357 | 2226  | 1929  | 50    |
| H12A | 2518 | 4145  | 484   | 64    |
| H12B | 2310 | 4115  | 1126  | 64    |
| H12C | 2209 | 3206  | 412   | 64    |
| H33A | 3885 | -2346 | -496  | 27    |
| H43A | 4498 | -2152 | -84   | 27    |
| H53A | 4755 | -418  | 504   | 27    |
| H73A | 3265 | -288  | -165  | 25    |
| H83A | 3402 | -2275 | 358   | 39    |
| H83B | 3325 | -2717 | -524  | 39    |
| H83C | 3015 | -2126 | -247  | 39    |

|      |      |       |       |    |
|------|------|-------|-------|----|
| H93A | 3262 | 58    | -1447 | 49 |
| H93B | 2970 | -924  | -1465 | 49 |
| H93C | 3344 | -1297 | -1566 | 49 |
| H10B | 4299 | 2230  | 673   | 26 |
| H11G | 4362 | 1299  | 1863  | 59 |
| H11H | 4692 | 2158  | 1957  | 59 |
| H11I | 4737 | 771   | 1868  | 59 |
| H12D | 4734 | 1948  | 6     | 54 |
| H12E | 4986 | 1326  | 771   | 54 |
| H12F | 4885 | 2687  | 794   | 54 |
| H34A | 2911 | 89    | 1038  | 27 |
| H44A | 2448 | -1249 | 685   | 36 |
| H54A | 2535 | -3185 | 1149  | 34 |
| H64A | 3086 | -3765 | 1945  | 29 |
| H74A | 3554 | -2450 | 2282  | 25 |
| H94A | 3975 | -1684 | 1421  | 23 |
| H10C | 4547 | -2332 | 2009  | 29 |
| H11J | 4863 | -1670 | 3252  | 33 |
| H12G | 4609 | -301  | 3883  | 32 |
| H13A | 4040 | 398   | 3300  | 26 |
| H15A | 4513 | 4717  | 1264  | 98 |
| H15B | 4132 | 5009  | 670   | 98 |
| H15C | 4419 | 6033  | 955   | 98 |
| H25A | 4476 | 4115  | -42   | 53 |
| H25B | 4404 | 5454  | -322  | 53 |
| H35A | 4974 | 5998  | 462   | 49 |
| H35B | 5047 | 4686  | 794   | 49 |
| H15D | 4178 | 5541  | 42    | 98 |
| H15E | 4242 | 5609  | 965   | 98 |
| H15F | 4256 | 4366  | 556   | 98 |
| H25C | 4779 | 6195  | 821   | 53 |
| H25D | 4846 | 4856  | 1108  | 53 |
| H35C | 4689 | 4298  | -286  | 49 |
| H35D | 4710 | 5668  | -476  | 49 |

---

Table S-12. Torsion angles [°] for 2.

|                  |           |
|------------------|-----------|
| N21-Fe1-O14-C14  | -16.9(6)  |
| N11-Fe1-O14-C14  | 173.1(3)  |
| C12-N11-C21-C31  | 176.0(4)  |
| Fe1-N11-C21-C31  | 0.5(6)    |
| C12-N11-C21-C11  | -1.5(6)   |
| Fe1-N11-C21-C11  | -177.0(3) |
| N11-C21-C31-C41  | -7.4(8)   |
| C11-C21-C31-C41  | 170.1(5)  |
| C13-N21-C41-C31  | -169.6(4) |
| Fe1-N21-C41-C31  | 3.4(6)    |
| C13-N21-C41-C51  | 7.2(6)    |
| Fe1-N21-C41-C51  | -179.7(3) |
| C21-C31-C41-N21  | 5.3(8)    |
| C21-C31-C41-C51  | -171.7(5) |
| C21-N11-C12-C62  | 95.2(5)   |
| Fe1-N11-C12-C62  | -89.1(4)  |
| C21-N11-C12-C22  | -87.8(5)  |
| Fe1-N11-C12-C22  | 87.9(4)   |
| C62-C12-C22-C32  | -0.9(6)   |
| N11-C12-C22-C32  | -177.9(4) |
| C62-C12-C22-C72  | 177.1(4)  |
| N11-C12-C22-C72  | 0.1(6)    |
| C12-C22-C32-C42  | -0.9(7)   |
| C72-C22-C32-C42  | -179.0(4) |
| C22-C32-C42-C52  | 2.2(7)    |
| C32-C42-C52-C62  | -1.7(7)   |
| C22-C12-C62-C52  | 1.4(7)    |
| N11-C12-C62-C52  | 178.3(4)  |
| C22-C12-C62-C102 | -176.8(4) |
| N11-C12-C62-C102 | 0.1(6)    |
| C42-C52-C62-C12  | -0.1(7)   |
| C42-C52-C62-C102 | 178.2(4)  |
| C32-C22-C72-C92  | -52.7(6)  |
| C12-C22-C72-C92  | 129.3(5)  |
| C32-C22-C72-C82  | 71.6(5)   |
| C12-C22-C72-C82  | -106.3(5) |

|                   |           |
|-------------------|-----------|
| C12-C62-C102-C112 | 127.9(5)  |
| C52-C62-C102-C112 | -50.3(6)  |
| C12-C62-C102-C122 | -108.8(5) |
| C52-C62-C102-C122 | 73.0(5)   |
| C41-N21-C13-C63   | 79.4(5)   |
| Fe1-N21-C13-C63   | -93.8(4)  |
| C41-N21-C13-C23   | -102.0(5) |
| Fe1-N21-C13-C23   | 84.8(4)   |
| C63-C13-C23-C33   | -0.8(6)   |
| N21-C13-C23-C33   | -179.3(4) |
| C63-C13-C23-C73   | 179.6(4)  |
| N21-C13-C23-C73   | 1.0(6)    |
| C13-C23-C33-C43   | 1.2(7)    |
| C73-C23-C33-C43   | -179.2(4) |
| C23-C33-C43-C53   | -0.3(7)   |
| C33-C43-C53-C63   | -1.1(7)   |
| C43-C53-C63-C13   | 1.5(7)    |
| C43-C53-C63-C103  | 178.9(4)  |
| C23-C13-C63-C53   | -0.5(6)   |
| N21-C13-C63-C53   | 178.0(4)  |
| C23-C13-C63-C103  | -177.9(4) |
| N21-C13-C63-C103  | 0.7(6)    |
| C33-C23-C73-C93   | -78.5(5)  |
| C13-C23-C73-C93   | 101.1(5)  |
| C33-C23-C73-C83   | 43.7(6)   |
| C13-C23-C73-C83   | -136.6(4) |
| C53-C63-C103-C113 | -82.9(6)  |
| C13-C63-C103-C113 | 94.4(5)   |
| C53-C63-C103-C123 | 40.5(6)   |
| C13-C63-C103-C123 | -142.2(4) |
| Fe1-O14-C14-C84   | 100.7(4)  |
| Fe1-O14-C14-C24   | -108.9(3) |
| O14-C14-C24-C34   | 42.2(6)   |
| C84-C14-C24-C34   | -168.1(4) |
| Fe1-C14-C24-C34   | -26.4(6)  |
| O14-C14-C24-C74   | -132.6(4) |
| C84-C14-C24-C74   | 17.1(6)   |

|                       |           |
|-----------------------|-----------|
| Fe1-C14-C24-C74       | 158.8(3)  |
| C74-C24-C34-C44       | -1.8(7)   |
| C14-C24-C34-C44       | -176.8(4) |
| C24-C34-C44-C54       | 1.5(7)    |
| C34-C44-C54-C64       | -0.3(8)   |
| C44-C54-C64-C74       | -0.4(7)   |
| C54-C64-C74-C24       | 0.0(7)    |
| C34-C24-C74-C64       | 1.1(7)    |
| C14-C24-C74-C64       | 176.1(4)  |
| O14-C14-C84-C94       | -155.9(4) |
| C24-C14-C84-C94       | 54.9(6)   |
| Fe1-C14-C84-C94       | -88.8(4)  |
| O14-C14-C84-C134      | 24.1(6)   |
| C24-C14-C84-C134      | -125.0(4) |
| Fe1-C14-C84-C134      | 91.2(4)   |
| C134-C84-C94-C104     | 0.9(7)    |
| C14-C84-C94-C104      | -179.1(4) |
| C84-C94-C104-C114     | 0.5(7)    |
| C94-C104-C114-C124    | -1.2(7)   |
| C104-C114-C124-C134   | 0.5(7)    |
| C114-C124-C134-C84    | 0.8(7)    |
| C94-C84-C134-C124     | -1.5(6)   |
| C14-C84-C134-C124     | 178.5(4)  |
| C15-C25-C35-C35#1     | 176.5(13) |
| C15'-C25'-C35'-C35'#1 | -168(4)   |

---

Symmetry transformations used to generate equivalent atoms:

#1 -x+1,-y+1,-z

[L<sup>Me</sup>FeCH<sub>3</sub>][K(18-crown-6)] (**4**). Low-temperature diffraction data ( $\omega$ -scans) were collected on a Rigaku R-AXIS RAPID diffractometer coupled to an R-AXIS RAPID imaging plate detector with Mo K $\alpha$  radiation ( $\lambda = 0.71073 \text{ \AA}$ ) for the structure of **4**. The diffraction images were processed and scaled using the Rigaku CrystalClear software (CrystalClear and CrystalStructure; Rigaku/MSK: The Woodlands, TX, 2005). The structure was solved with SHELXT and was refined against F<sup>2</sup> on all data by full-matrix least squares with SHELXL (Sheldrick, G. M. Acta Cryst. 2008, A64, 112–122). All non-hydrogen atoms were refined anisotropically. Hydrogen atoms were included in the model at geometrically calculated positions and refined using a riding model. The isotropic displacement parameters of all hydrogen atoms were fixed to 1.2 times the U value of the atoms to which they are linked (1.5 times for methyl groups). The N-aryl groups of the diketiminate supporting ligand are disordered. The site occupancies of the disordered groups were freely refined and converged to be nearly equal occupancies. Chemically identical 1,2 C-C distances were restrained to be similar. An attempt was made to model the 18-crown-6 as disordered, but a stable model was not obtained. Some 1,3 C-C distances of the crown ether converged at chemically unreasonable distances, and were subsequently restrained to 2.4(2) $\text{\AA}$ . Many of the geometrically generated solvent atoms caused close contact with those generated by symmetry. The program SQUEEZE was used to compensate for the contribution of disordered solvents contained in voids within the crystal lattice from the diffraction intensities. This procedure was applied to the data file and the submitted model is based on the solvent-removed data. Based on the total electron density found in the voids (198 e/ $\text{\AA}^3$ ), it is likely that ~4 toluene molecules are present in the unit cell. See "\_platon\_squeeze\_details" in this .cif for more information. The full numbering scheme of compound **4** can be found in the full details of the X-ray structure determination (CIF), which is included as Supporting Information.



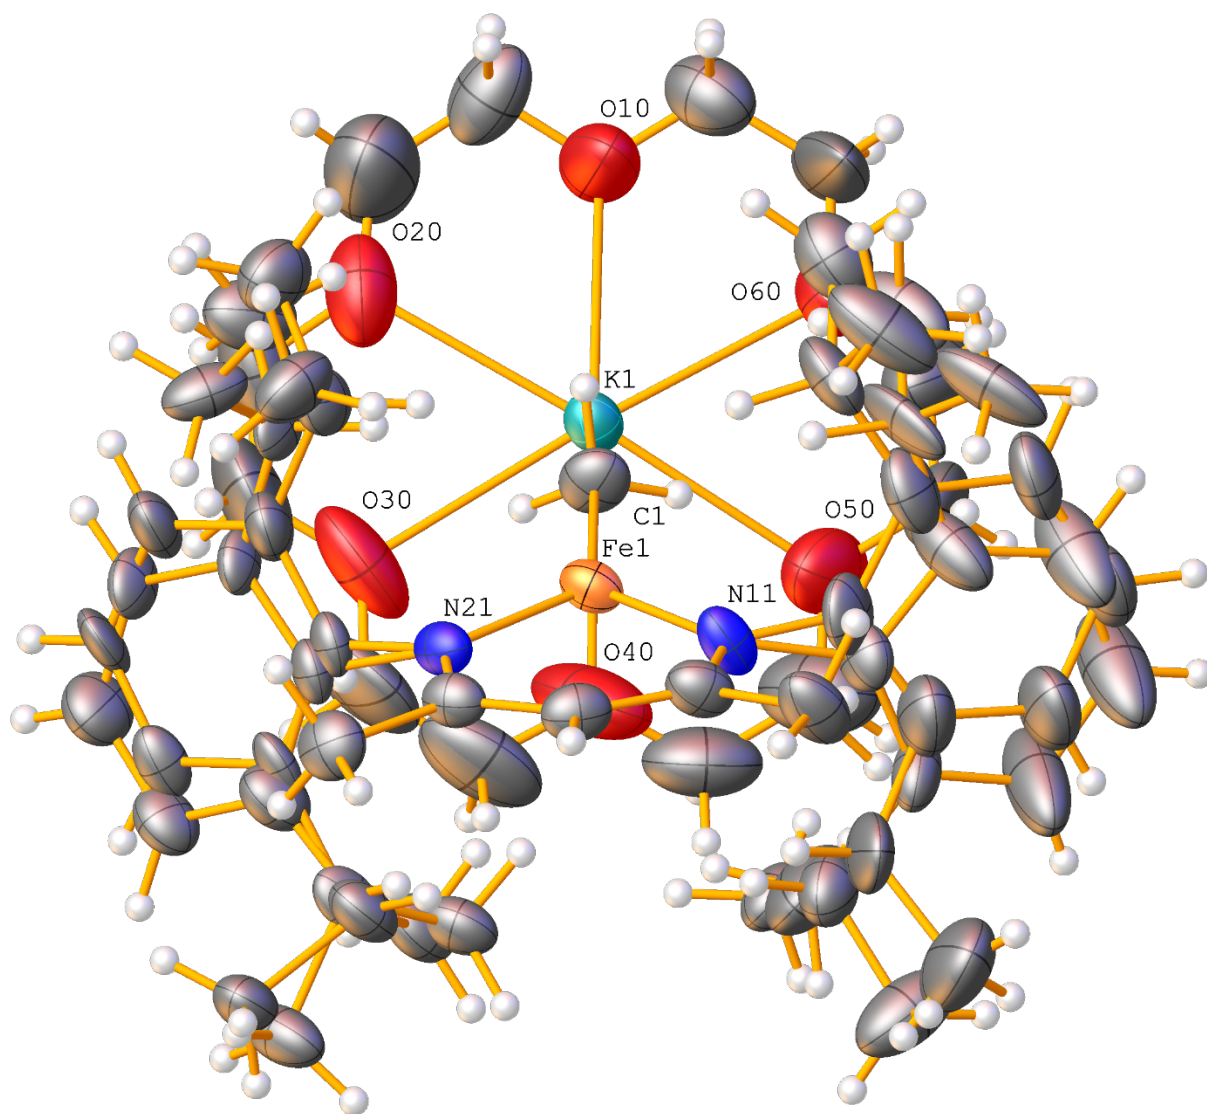

**Figure S-26:** A partial numbering scheme of **4** with 50% thermal ellipsoid probability levels. The hydrogen atoms are shown as circles for clarity.

Table S-13. Crystal data and structure refinement for **4**.

|                                   |                                                                  |                       |
|-----------------------------------|------------------------------------------------------------------|-----------------------|
| Identification code               | spider-16053                                                     |                       |
| CSD Deposition Number             | 1944810                                                          |                       |
| Empirical formula                 | C <sub>42</sub> H <sub>68</sub> FeKN <sub>2</sub> O <sub>6</sub> |                       |
| Formula weight                    | 791.93                                                           |                       |
| Temperature                       | 93(2) K                                                          |                       |
| Wavelength                        | 0.71075 Å                                                        |                       |
| Crystal system                    | Orthorhombic                                                     |                       |
| Space group                       | P2 <sub>1</sub> 2 <sub>1</sub> 2 <sub>1</sub>                    |                       |
| Unit cell dimensions              | $a = 16.6896(5)$ Å                                               | $\alpha = 90^\circ$ . |
|                                   | $b = 24.5737(17)$ Å                                              | $\beta = 90^\circ$ .  |
|                                   | $c = 12.2392(4)$ Å                                               | $\gamma = 90^\circ$ . |
| Volume                            | 5019.6(4) Å <sup>3</sup>                                         |                       |
| Z                                 | 4                                                                |                       |
| Density (calculated)              | 1.048 g/cm <sup>3</sup>                                          |                       |
| Absorption coefficient            | 0.422 mm <sup>-1</sup>                                           |                       |
| F(000)                            | 1708                                                             |                       |
| Crystal size                      | 0.250 x 0.150 x 0.100 mm <sup>3</sup>                            |                       |
| Crystal color and habit           | Red block                                                        |                       |
| Diffractometer                    | Rigaku R-AXIS RAPID imaging plate                                |                       |
| Theta range for data collection   | 2.992 to 25.028°.                                                |                       |
| Index ranges                      | -19 ≤ h ≤ 19, -29 ≤ k ≤ 29, -14 ≤ l ≤ 14                         |                       |
| Reflections collected             | 77966                                                            |                       |
| Independent reflections           | 8866 [R(int) = 0.1154]                                           |                       |
| Observed reflections (I > 2σ(I))  | 7995                                                             |                       |
| Completeness to theta = 25.028°   | 99.7%                                                            |                       |
| Absorption correction             | Semi-empirical from equivalents                                  |                       |
| Max. and min. transmission        | 1.000 and 0.663                                                  |                       |
| Solution method                   | SHELXT-2014/5 (Sheldrick, 2014)                                  |                       |
| Refinement method                 | SHELXL-2014/7 (Sheldrick, 2014)                                  |                       |
| Data / restraints / parameters    | 8866 / 950 / 700                                                 |                       |
| Goodness-of-fit on F <sup>2</sup> | 1.038                                                            |                       |
| Final R indices [I > 2σ(I)]       | R1 = 0.0868, wR2 = 0.2196                                        |                       |
| R indices (all data)              | R1 = 0.0933, wR2 = 0.2252                                        |                       |
| Absolute structure parameter      | 0.08(5)                                                          |                       |
| Largest diff. peak and hole       | 0.858 and -0.371 e Å <sup>-3</sup>                               |                       |

Table S-14. Atomic coordinates ( $\times 10^4$ ) and equivalent isotropic displacement parameters ( $\text{\AA}^2 \times 10^3$ ) for **4**.  $U(\text{eq})$  is defined as one third of the trace of the orthogonalized  $U^{ij}$  tensor.

|        | x        | y        | z        | $U(\text{eq})$ |
|--------|----------|----------|----------|----------------|
| Fe(1)  | 4819(1)  | 6406(1)  | 3342(1)  | 37(1)          |
| C(1)   | 5543(5)  | 7051(3)  | 3062(8)  | 50(2)          |
| N(11)  | 4863(4)  | 5832(3)  | 4395(5)  | 43(2)          |
| N(21)  | 3803(4)  | 6229(3)  | 2673(6)  | 38(2)          |
| C(11)  | 4251(6)  | 5116(4)  | 5577(8)  | 59(3)          |
| C(21)  | 4212(5)  | 5497(3)  | 4590(7)  | 44(2)          |
| C(31)  | 3515(5)  | 5510(3)  | 3993(7)  | 42(2)          |
| C(41)  | 3318(4)  | 5832(3)  | 3059(7)  | 38(2)          |
| C(51)  | 2508(5)  | 5718(4)  | 2505(8)  | 49(2)          |
| C(1A)  | 5669(13) | 5663(11) | 4880(20) | 43(6)          |
| C(2A)  | 6185(13) | 5268(12) | 4432(18) | 54(5)          |
| C(3A)  | 6964(15) | 5170(19) | 4790(20) | 115(13)        |
| C(4A)  | 7224(18) | 5461(19) | 5720(20) | 120(12)        |
| C(5A)  | 6734(14) | 5840(20) | 6240(30) | 95(12)         |
| C(6A)  | 5977(13) | 5933(13) | 5808(19) | 69(6)          |
| C(7A)  | 5970(15) | 5002(8)  | 3359(19) | 57(5)          |
| C(8A)  | 6399(16) | 5284(11) | 2391(19) | 56(6)          |
| C(9A)  | 6210(20) | 4404(10) | 3410(30) | 93(9)          |
| C(10A) | 5452(14) | 6365(10) | 6331(17) | 69(6)          |
| C(11A) | 5852(15) | 6929(12) | 6320(20) | 80(7)          |
| C(12A) | 5249(19) | 6173(13) | 7503(17) | 88(8)          |
| C(1B)  | 5482(15) | 5811(9)  | 5052(17) | 56(5)          |
| C(2B)  | 6052(14) | 5407(10) | 4870(20) | 73(6)          |
| C(3B)  | 6810(14) | 5358(9)  | 5340(20) | 81(7)          |
| C(4B)  | 6959(16) | 5716(9)  | 6200(20) | 75(7)          |
| C(5B)  | 6411(11) | 6130(8)  | 6463(15) | 65(5)          |
| C(6B)  | 5680(12) | 6167(9)  | 5923(15) | 59(5)          |
| C(7B)  | 5913(16) | 5003(9)  | 3950(20) | 97(8)          |
| C(8B)  | 6290(30) | 5174(14) | 2850(30) | 132(13)        |
| C(9B)  | 6110(20) | 4402(10) | 4180(30) | 128(11)        |
| C(10B) | 5062(12) | 6603(8)  | 6194(13) | 60(4)          |

|        |          |          |          |        |
|--------|----------|----------|----------|--------|
| C(11B) | 5446(15) | 7183(9)  | 6280(20) | 73(6)  |
| C(12B) | 4631(18) | 6482(12) | 7278(15) | 95(8)  |
| C(1C)  | 3660(20) | 6510(8)  | 1759(16) | 34(3)  |
| C(2C)  | 3463(14) | 7066(7)  | 1789(16) | 47(4)  |
| C(3C)  | 3350(13) | 7351(8)  | 815(16)  | 53(5)  |
| C(4C)  | 3444(13) | 7091(7)  | -204(17) | 51(5)  |
| C(5C)  | 3576(13) | 6522(8)  | -223(15) | 44(4)  |
| C(6C)  | 3700(16) | 6226(7)  | 751(15)  | 36(4)  |
| C(7C)  | 3336(10) | 7367(7)  | 2376(17) | 41(4)  |
| C(8C)  | 3626(19) | 7968(8)  | 2240(20) | 72(8)  |
| C(9C)  | 2438(11) | 7385(8)  | 2670(20) | 56(6)  |
| C(10C) | 4001(12) | 5637(8)  | 612(19)  | 40(5)  |
| C(11C) | 4927(12) | 5541(14) | 700(20)  | 51(6)  |
| C(12C) | 3702(15) | 5187(12) | -200(30) | 60(8)  |
| C(1D)  | 3650(20) | 6458(10) | 1490(20) | 34(3)  |
| C(2D)  | 3459(15) | 7011(9)  | 1376(15) | 36(5)  |
| C(3D)  | 3426(14) | 7219(10) | 311(18)  | 45(6)  |
| C(4D)  | 3531(17) | 6885(10) | -600(20) | 62(6)  |
| C(5D)  | 3672(18) | 6319(10) | -500(19) | 51(6)  |
| C(6D)  | 3740(30) | 6124(12) | 560(20)  | 54(7)  |
| C(7D)  | 3337(11) | 7334(6)  | 2896(16) | 55(4)  |
| C(8D)  | 3393(16) | 7962(7)  | 2840(20) | 69(6)  |
| C(9D)  | 2536(11) | 7185(8)  | 3451(19) | 67(5)  |
| C(10D) | 4003(18) | 5541(11) | 730(30)  | 54(7)  |
| C(11D) | 4879(19) | 5630(20) | 360(30)  | 59(8)  |
| C(12D) | 3450(20) | 5328(12) | -200(30) | 54(8)  |
| K(1)   | 6893(1)  | 7755(1)  | 1957(1)  | 42(1)  |
| O(10)  | 7033(7)  | 8761(4)  | 2847(10) | 135(5) |
| O(20)  | 6032(6)  | 8600(5)  | 1058(8)  | 106(3) |
| O(30)  | 6041(7)  | 7580(5)  | 38(8)    | 119(3) |
| O(40)  | 6940(7)  | 6726(5)  | 851(10)  | 130(4) |
| O(50)  | 7989(8)  | 6930(4)  | 2549(8)  | 120(4) |
| O(60)  | 7950(5)  | 7928(3)  | 3667(6)  | 79(2)  |
| C(10)  | 6527(7)  | 9150(5)  | 2540(12) | 88(3)  |
| C(20)  | 6147(16) | 9069(7)  | 1503(18) | 167(9) |
| C(30)  | 5720(11) | 8516(8)  | 85(12)   | 131(6) |

|        |          |         |          |         |
|--------|----------|---------|----------|---------|
| C(40)  | 5603(17) | 7978(8) | -340(20) | 195(12) |
| C(50)  | 5903(13) | 7066(7) | -251(17) | 155(8)  |
| C(60)  | 6464(11) | 6652(7) | 23(14)   | 126(5)  |
| C(70)  | 7542(10) | 6399(6) | 1100(12) | 108(4)  |
| C(80)  | 7896(12) | 6451(7) | 2144(15) | 134(6)  |
| C(90)  | 8335(12) | 6989(6) | 3531(13) | 136(7)  |
| C(100) | 8375(14) | 7507(6) | 3906(14) | 144(7)  |
| C(110) | 7963(17) | 8423(7) | 4140(20) | 235(17) |
| C(120) | 7420(7)  | 8840(5) | 3783(10) | 84(3)   |

---

Table S-15. Bond lengths [Å] and angles [°] for **4**.

---

|              |           |
|--------------|-----------|
| Fe(1)-N(11)  | 1.912(6)  |
| Fe(1)-N(21)  | 1.932(6)  |
| Fe(1)-C(1)   | 2.024(8)  |
| C(1)-K(1)    | 3.146(8)  |
| C(1)-H(1A)   | 0.9800    |
| C(1)-H(1B)   | 0.9800    |
| C(1)-H(1C)   | 0.9800    |
| N(11)-C(1B)  | 1.31(2)   |
| N(11)-C(21)  | 1.385(11) |
| N(11)-C(1A)  | 1.53(2)   |
| N(21)-C(1C)  | 1.34(2)   |
| N(21)-C(41)  | 1.352(10) |
| N(21)-C(1D)  | 1.58(3)   |
| C(11)-C(21)  | 1.529(12) |
| C(11)-H(11A) | 0.9800    |
| C(11)-H(11B) | 0.9800    |
| C(11)-H(11C) | 0.9800    |
| C(21)-C(31)  | 1.374(12) |
| C(31)-C(41)  | 1.429(12) |
| C(31)-H(31)  | 0.9500    |
| C(41)-C(51)  | 1.539(11) |
| C(51)-H(51A) | 0.9800    |
| C(51)-H(51B) | 0.9800    |
| C(51)-H(51C) | 0.9800    |
| C(1A)-C(2A)  | 1.409(18) |
| C(1A)-C(6A)  | 1.414(17) |
| C(2A)-C(3A)  | 1.393(18) |
| C(2A)-C(7A)  | 1.51(2)   |
| C(3A)-C(4A)  | 1.407(19) |
| C(3A)-H(3A)  | 0.9500    |
| C(4A)-C(5A)  | 1.394(19) |
| C(4A)-H(4A)  | 0.9500    |
| C(5A)-C(6A)  | 1.391(19) |
| C(5A)-H(5A)  | 0.9500    |

|               |           |
|---------------|-----------|
| C(6A)-C(10A)  | 1.52(2)   |
| C(7A)-C(9A)   | 1.522(18) |
| C(7A)-C(8A)   | 1.548(19) |
| C(7A)-H(7A)   | 1.0000    |
| C(8A)-H(8AA)  | 0.9800    |
| C(8A)-H(8AB)  | 0.9800    |
| C(8A)-H(8AC)  | 0.9800    |
| C(9A)-H(9AA)  | 0.9800    |
| C(9A)-H(9AB)  | 0.9800    |
| C(9A)-H(9AC)  | 0.9800    |
| C(10A)-C(11A) | 1.537(19) |
| C(10A)-C(12A) | 1.548(19) |
| C(10A)-H(10A) | 1.0000    |
| C(11A)-H(11D) | 0.9800    |
| C(11A)-H(11E) | 0.9800    |
| C(11A)-H(11F) | 0.9800    |
| C(12A)-H(12A) | 0.9800    |
| C(12A)-H(12B) | 0.9800    |
| C(12A)-H(12C) | 0.9800    |
| C(1B)-C(2B)   | 1.392(18) |
| C(1B)-C(6B)   | 1.419(18) |
| C(2B)-C(3B)   | 1.396(17) |
| C(2B)-C(7B)   | 1.52(2)   |
| C(3B)-C(4B)   | 1.393(18) |
| C(3B)-H(3B)   | 0.9500    |
| C(4B)-C(5B)   | 1.404(18) |
| C(4B)-H(4B)   | 0.9500    |
| C(5B)-C(6B)   | 1.390(17) |
| C(5B)-H(5B)   | 0.9500    |
| C(6B)-C(10B)  | 1.52(2)   |
| C(7B)-C(9B)   | 1.538(18) |
| C(7B)-C(8B)   | 1.55(2)   |
| C(7B)-H(7B)   | 1.0000    |
| C(8B)-H(8BA)  | 0.9800    |
| C(8B)-H(8BB)  | 0.9800    |
| C(8B)-H(8BC)  | 0.9800    |

|               |           |
|---------------|-----------|
| C(9B)-H(9BA)  | 0.9800    |
| C(9B)-H(9BB)  | 0.9800    |
| C(9B)-H(9BC)  | 0.9800    |
| C(10B)-C(12B) | 1.538(17) |
| C(10B)-C(11B) | 1.568(17) |
| C(10B)-H(10B) | 1.0000    |
| C(11B)-H(11G) | 0.9800    |
| C(11B)-H(11H) | 0.9800    |
| C(11B)-H(11I) | 0.9800    |
| C(12B)-H(12D) | 0.9800    |
| C(12B)-H(12E) | 0.9800    |
| C(12B)-H(12F) | 0.9800    |
| C(1C)-C(2C)   | 1.405(16) |
| C(1C)-C(6C)   | 1.419(16) |
| C(2C)-C(3C)   | 1.395(16) |
| C(2C)-C(7D)   | 1.520(18) |
| C(3C)-C(4C)   | 1.410(17) |
| C(3C)-H(3C)   | 0.9500    |
| C(4C)-C(5C)   | 1.416(17) |
| C(4C)-K(1)#1  | 3.383(17) |
| C(4C)-H(4C)   | 0.9500    |
| C(5C)-C(6C)   | 1.412(15) |
| C(5C)-H(5C)   | 0.9500    |
| C(6C)-C(10C)  | 1.541(17) |
| C(7C)-C(2D)   | 1.518(19) |
| C(7C)-C(9C)   | 1.542(18) |
| C(7C)-C(8C)   | 1.563(18) |
| C(7C)-H(7C)   | 1.0000    |
| C(8C)-H(8CA)  | 0.9800    |
| C(8C)-H(8CB)  | 0.9800    |
| C(8C)-H(8CC)  | 0.9800    |
| C(9C)-H(9CA)  | 0.9800    |
| C(9C)-H(9CB)  | 0.9800    |
| C(9C)-H(9CC)  | 0.9800    |
| C(10C)-C(12C) | 1.567(17) |
| C(10C)-C(11C) | 1.568(17) |



|               |           |
|---------------|-----------|
| C(10C)-H(10C) | 1.0000    |
| C(11C)-H(11J) | 0.9800    |
| C(11C)-H(11K) | 0.9800    |
| C(11C)-H(11L) | 0.9800    |
| C(12C)-H(12G) | 0.9800    |
| C(12C)-H(12H) | 0.9800    |
| C(12C)-H(12I) | 0.9800    |
| C(1D)-C(2D)   | 1.400(17) |
| C(1D)-C(6D)   | 1.404(17) |
| C(2D)-C(3D)   | 1.401(17) |
| C(3D)-C(4D)   | 1.396(18) |
| C(3D)-H(3D)   | 0.9500    |
| C(4D)-C(5D)   | 1.416(19) |
| C(4D)-K(1)#1  | 3.32(3)   |
| C(4D)-H(4D)   | 0.9500    |
| C(5D)-C(6D)   | 1.393(18) |
| C(5D)-H(5D)   | 0.9500    |
| C(6D)-C(10D)  | 1.51(2)   |
| C(7D)-C(9D)   | 1.542(18) |
| C(7D)-C(8D)   | 1.548(17) |
| C(7D)-H(7D)   | 1.0000    |
| C(8D)-H(8DA)  | 0.9800    |
| C(8D)-H(8DB)  | 0.9800    |
| C(8D)-H(8DC)  | 0.9800    |
| C(9D)-H(9DA)  | 0.9800    |
| C(9D)-H(9DB)  | 0.9800    |
| C(9D)-H(9DC)  | 0.9800    |
| C(10D)-C(11D) | 1.55(2)   |
| C(10D)-C(12D) | 1.557(19) |
| C(10D)-H(10D) | 1.0000    |
| C(11D)-H(11M) | 0.9800    |
| C(11D)-H(11N) | 0.9800    |
| C(11D)-H(11O) | 0.9800    |
| C(12D)-H(12J) | 0.9800    |
| C(12D)-H(12K) | 0.9800    |
| C(12D)-H(12L) | 0.9800    |

|              |           |
|--------------|-----------|
| K(1)-O(10)   | 2.712(9)  |
| K(1)-O(20)   | 2.756(10) |
| K(1)-O(60)   | 2.770(7)  |
| K(1)-O(30)   | 2.779(9)  |
| K(1)-O(50)   | 2.824(10) |
| K(1)-O(40)   | 2.870(10) |
| O(10)-C(120) | 1.330(13) |
| O(10)-C(10)  | 1.330(12) |
| O(20)-C(20)  | 1.287(15) |
| O(20)-C(30)  | 1.316(13) |
| O(30)-C(40)  | 1.306(16) |
| O(30)-C(50)  | 1.333(15) |
| O(40)-C(60)  | 1.300(14) |
| O(40)-C(70)  | 1.322(14) |
| O(50)-C(80)  | 1.287(14) |
| O(50)-C(90)  | 1.341(14) |
| O(60)-C(100) | 1.287(13) |
| O(60)-C(110) | 1.347(13) |
| C(10)-C(20)  | 1.432(17) |
| C(10)-H(10E) | 0.9900    |
| C(10)-H(10F) | 0.9900    |
| C(20)-H(20A) | 0.9900    |
| C(20)-H(20B) | 0.9900    |
| C(30)-C(40)  | 1.436(18) |
| C(30)-H(30A) | 0.9900    |
| C(30)-H(30B) | 0.9900    |
| C(40)-H(40A) | 0.9900    |
| C(40)-H(40B) | 0.9900    |
| C(50)-C(60)  | 1.424(18) |
| C(50)-H(50A) | 0.9900    |
| C(50)-H(50B) | 0.9900    |
| C(60)-H(60A) | 0.9900    |
| C(60)-H(60B) | 0.9900    |
| C(70)-C(80)  | 1.415(17) |
| C(70)-H(70A) | 0.9900    |
| C(70)-H(70B) | 0.9900    |

|                   |           |
|-------------------|-----------|
| C(80)-H(80A)      | 0.9900    |
| C(80)-H(80B)      | 0.9900    |
| C(90)-C(100)      | 1.355(16) |
| C(90)-H(90A)      | 0.9900    |
| C(90)-H(90B)      | 0.9900    |
| C(100)-H(10G)     | 0.9900    |
| C(100)-H(10H)     | 0.9900    |
| C(110)-C(120)     | 1.437(16) |
| C(110)-H(11P)     | 0.9900    |
| C(110)-H(11Q)     | 0.9900    |
| C(120)-H(12M)     | 0.9900    |
| C(120)-H(12N)     | 0.9900    |
|                   |           |
| N(11)-Fe(1)-N(21) | 98.9(3)   |
| N(11)-Fe(1)-C(1)  | 132.0(3)  |
| N(21)-Fe(1)-C(1)  | 128.9(3)  |
| Fe(1)-C(1)-K(1)   | 158.7(4)  |
| Fe(1)-C(1)-H(1A)  | 109.5     |
| K(1)-C(1)-H(1A)   | 58.0      |
| Fe(1)-C(1)-H(1B)  | 109.5     |
| K(1)-C(1)-H(1B)   | 64.6      |
| H(1A)-C(1)-H(1B)  | 109.5     |
| Fe(1)-C(1)-H(1C)  | 109.5     |
| K(1)-C(1)-H(1C)   | 91.6      |
| H(1A)-C(1)-H(1C)  | 109.5     |
| H(1B)-C(1)-H(1C)  | 109.5     |
| C(1B)-N(11)-C(21) | 119.3(12) |
| C(21)-N(11)-C(1A) | 117.5(13) |
| C(1B)-N(11)-Fe(1) | 118.3(11) |
| C(21)-N(11)-Fe(1) | 121.6(6)  |
| C(1A)-N(11)-Fe(1) | 119.8(12) |
| C(1C)-N(21)-C(41) | 123.7(15) |
| C(41)-N(21)-C(1D) | 118.6(15) |
| C(1C)-N(21)-Fe(1) | 113.6(14) |
| C(41)-N(21)-Fe(1) | 122.6(5)  |
| C(1D)-N(21)-Fe(1) | 117.1(15) |

|                     |           |
|---------------------|-----------|
| C(21)-C(11)-H(11A)  | 109.5     |
| C(21)-C(11)-H(11B)  | 109.5     |
| H(11A)-C(11)-H(11B) | 109.5     |
| C(21)-C(11)-H(11C)  | 109.5     |
| H(11A)-C(11)-H(11C) | 109.5     |
| H(11B)-C(11)-H(11C) | 109.5     |
| C(31)-C(21)-N(11)   | 124.0(8)  |
| C(31)-C(21)-C(11)   | 118.1(8)  |
| N(11)-C(21)-C(11)   | 117.8(8)  |
| C(21)-C(31)-C(41)   | 129.3(7)  |
| C(21)-C(31)-H(31)   | 115.4     |
| C(41)-C(31)-H(31)   | 115.4     |
| N(21)-C(41)-C(31)   | 122.8(7)  |
| N(21)-C(41)-C(51)   | 120.2(7)  |
| C(31)-C(41)-C(51)   | 117.0(7)  |
| C(41)-C(51)-H(51A)  | 109.5     |
| C(41)-C(51)-H(51B)  | 109.5     |
| H(51A)-C(51)-H(51B) | 109.5     |
| C(41)-C(51)-H(51C)  | 109.5     |
| H(51A)-C(51)-H(51C) | 109.5     |
| H(51B)-C(51)-H(51C) | 109.5     |
| C(2A)-C(1A)-C(6A)   | 114(2)    |
| C(2A)-C(1A)-N(11)   | 125.1(15) |
| C(6A)-C(1A)-N(11)   | 120.3(17) |
| C(3A)-C(2A)-C(1A)   | 124(2)    |
| C(3A)-C(2A)-C(7A)   | 115(2)    |
| C(1A)-C(2A)-C(7A)   | 119.4(16) |
| C(2A)-C(3A)-C(4A)   | 117(3)    |
| C(2A)-C(3A)-H(3A)   | 121.5     |
| C(4A)-C(3A)-H(3A)   | 121.5     |
| C(5A)-C(4A)-C(3A)   | 122(3)    |
| C(5A)-C(4A)-H(4A)   | 119.0     |
| C(3A)-C(4A)-H(4A)   | 119.0     |
| C(6A)-C(5A)-C(4A)   | 118(3)    |
| C(6A)-C(5A)-H(5A)   | 121.1     |
| C(4A)-C(5A)-H(5A)   | 121.1     |

|                      |           |
|----------------------|-----------|
| C(5A)-C(6A)-C(1A)    | 124(2)    |
| C(5A)-C(6A)-C(10A)   | 119(2)    |
| C(1A)-C(6A)-C(10A)   | 117.3(18) |
| C(2A)-C(7A)-C(9A)    | 109(2)    |
| C(2A)-C(7A)-C(8A)    | 111.3(18) |
| C(9A)-C(7A)-C(8A)    | 110(2)    |
| C(2A)-C(7A)-H(7A)    | 108.9     |
| C(9A)-C(7A)-H(7A)    | 108.9     |
| C(8A)-C(7A)-H(7A)    | 108.9     |
| C(7A)-C(8A)-H(8AA)   | 109.5     |
| C(7A)-C(8A)-H(8AB)   | 109.5     |
| H(8AA)-C(8A)-H(8AB)  | 109.5     |
| C(7A)-C(8A)-H(8AC)   | 109.5     |
| H(8AA)-C(8A)-H(8AC)  | 109.5     |
| H(8AB)-C(8A)-H(8AC)  | 109.5     |
| C(7A)-C(9A)-H(9AA)   | 109.5     |
| C(7A)-C(9A)-H(9AB)   | 109.5     |
| H(9AA)-C(9A)-H(9AB)  | 109.5     |
| C(7A)-C(9A)-H(9AC)   | 109.5     |
| H(9AA)-C(9A)-H(9AC)  | 109.5     |
| H(9AB)-C(9A)-H(9AC)  | 109.5     |
| C(6A)-C(10A)-C(11A)  | 112(2)    |
| C(6A)-C(10A)-C(12A)  | 108(2)    |
| C(11A)-C(10A)-C(12A) | 112.2(18) |
| C(6A)-C(10A)-H(10A)  | 108.2     |
| C(11A)-C(10A)-H(10A) | 108.2     |
| C(12A)-C(10A)-H(10A) | 108.2     |
| C(10A)-C(11A)-H(11D) | 109.5     |
| C(10A)-C(11A)-H(11E) | 109.5     |
| H(11D)-C(11A)-H(11E) | 109.5     |
| C(10A)-C(11A)-H(11F) | 109.5     |
| H(11D)-C(11A)-H(11F) | 109.5     |
| H(11E)-C(11A)-H(11F) | 109.5     |
| C(10A)-C(12A)-H(12A) | 109.5     |
| C(10A)-C(12A)-H(12B) | 109.5     |
| H(12A)-C(12A)-H(12B) | 109.5     |

|                      |           |
|----------------------|-----------|
| C(10A)-C(12A)-H(12C) | 109.5     |
| H(12A)-C(12A)-H(12C) | 109.5     |
| H(12B)-C(12A)-H(12C) | 109.5     |
| N(11)-C(1B)-C(2B)    | 117.9(16) |
| N(11)-C(1B)-C(6B)    | 128.4(18) |
| C(2B)-C(1B)-C(6B)    | 113.6(19) |
| C(1B)-C(2B)-C(3B)    | 128(2)    |
| C(1B)-C(2B)-C(7B)    | 118.7(16) |
| C(3B)-C(2B)-C(7B)    | 112.8(19) |
| C(4B)-C(3B)-C(2B)    | 115(2)    |
| C(4B)-C(3B)-H(3B)    | 122.6     |
| C(2B)-C(3B)-H(3B)    | 122.6     |
| C(3B)-C(4B)-C(5B)    | 121(2)    |
| C(3B)-C(4B)-H(4B)    | 119.6     |
| C(5B)-C(4B)-H(4B)    | 119.6     |
| C(6B)-C(5B)-C(4B)    | 120.7(19) |
| C(6B)-C(5B)-H(5B)    | 119.7     |
| C(4B)-C(5B)-H(5B)    | 119.7     |
| C(5B)-C(6B)-C(1B)    | 121.4(19) |
| C(5B)-C(6B)-C(10B)   | 122.5(17) |
| C(1B)-C(6B)-C(10B)   | 116.1(15) |
| C(2B)-C(7B)-C(9B)    | 117(2)    |
| C(2B)-C(7B)-C(8B)    | 114(2)    |
| C(9B)-C(7B)-C(8B)    | 109.3(18) |
| C(2B)-C(7B)-H(7B)    | 105.0     |
| C(9B)-C(7B)-H(7B)    | 105.0     |
| C(8B)-C(7B)-H(7B)    | 105.0     |
| C(7B)-C(8B)-H(8BA)   | 109.5     |
| C(7B)-C(8B)-H(8BB)   | 109.5     |
| H(8BA)-C(8B)-H(8BB)  | 109.5     |
| C(7B)-C(8B)-H(8BC)   | 109.5     |
| H(8BA)-C(8B)-H(8BC)  | 109.5     |
| H(8BB)-C(8B)-H(8BC)  | 109.5     |
| C(7B)-C(9B)-H(9BA)   | 109.5     |
| C(7B)-C(9B)-H(9BB)   | 109.5     |
| H(9BA)-C(9B)-H(9BB)  | 109.5     |

|                      |           |
|----------------------|-----------|
| C(7B)-C(9B)-H(9BC)   | 109.5     |
| H(9BA)-C(9B)-H(9BC)  | 109.5     |
| H(9BB)-C(9B)-H(9BC)  | 109.5     |
| C(6B)-C(10B)-C(12B)  | 111.7(19) |
| C(6B)-C(10B)-C(11B)  | 112.1(16) |
| C(12B)-C(10B)-C(11B) | 107.8(16) |
| C(6B)-C(10B)-H(10B)  | 108.3     |
| C(12B)-C(10B)-H(10B) | 108.3     |
| C(11B)-C(10B)-H(10B) | 108.3     |
| C(10B)-C(11B)-H(11G) | 109.5     |
| C(10B)-C(11B)-H(11H) | 109.5     |
| H(11G)-C(11B)-H(11H) | 109.5     |
| C(10B)-C(11B)-H(11I) | 109.5     |
| H(11G)-C(11B)-H(11I) | 109.5     |
| H(11H)-C(11B)-H(11I) | 109.5     |
| C(10B)-C(12B)-H(12D) | 109.5     |
| C(10B)-C(12B)-H(12E) | 109.5     |
| H(12D)-C(12B)-H(12E) | 109.5     |
| C(10B)-C(12B)-H(12F) | 109.5     |
| H(12D)-C(12B)-H(12F) | 109.5     |
| H(12E)-C(12B)-H(12F) | 109.5     |
| N(21)-C(1C)-C(2C)    | 121.5(14) |
| N(21)-C(1C)-C(6C)    | 117.6(14) |
| C(2C)-C(1C)-C(6C)    | 120.9(16) |
| C(3C)-C(2C)-C(1C)    | 119.7(16) |
| C(3C)-C(2C)-C(7D)    | 121.8(15) |
| C(1C)-C(2C)-C(7D)    | 118.4(14) |
| C(2C)-C(3C)-C(4C)    | 120.9(16) |
| C(2C)-C(3C)-H(3C)    | 119.5     |
| C(4C)-C(3C)-H(3C)    | 119.5     |
| C(3C)-C(4C)-C(5C)    | 118.6(16) |
| C(3C)-C(4C)-K(1)#1   | 115.1(13) |
| C(5C)-C(4C)-K(1)#1   | 102.7(11) |
| C(3C)-C(4C)-H(4C)    | 120.7     |
| C(5C)-C(4C)-H(4C)    | 120.7     |
| K(1)#1-C(4C)-H(4C)   | 50.9      |

|                      |           |
|----------------------|-----------|
| C(6C)-C(5C)-C(4C)    | 121.1(16) |
| C(6C)-C(5C)-H(5C)    | 119.4     |
| C(4C)-C(5C)-H(5C)    | 119.4     |
| C(5C)-C(6C)-C(1C)    | 118.3(15) |
| C(5C)-C(6C)-C(10C)   | 115.9(16) |
| C(1C)-C(6C)-C(10C)   | 125.1(16) |
| C(2D)-C(7C)-C(9C)    | 109.9(17) |
| C(2D)-C(7C)-C(8C)    | 114.4(17) |
| C(9C)-C(7C)-C(8C)    | 107.4(17) |
| C(2D)-C(7C)-H(7C)    | 108.3     |
| C(9C)-C(7C)-H(7C)    | 108.3     |
| C(8C)-C(7C)-H(7C)    | 108.3     |
| C(7C)-C(8C)-H(8CA)   | 109.5     |
| C(7C)-C(8C)-H(8CB)   | 109.5     |
| H(8CA)-C(8C)-H(8CB)  | 109.5     |
| C(7C)-C(8C)-H(8CC)   | 109.5     |
| H(8CA)-C(8C)-H(8CC)  | 109.5     |
| H(8CB)-C(8C)-H(8CC)  | 109.5     |
| C(7C)-C(9C)-H(9CA)   | 109.5     |
| C(7C)-C(9C)-H(9CB)   | 109.5     |
| H(9CA)-C(9C)-H(9CB)  | 109.5     |
| C(7C)-C(9C)-H(9CC)   | 109.5     |
| H(9CA)-C(9C)-H(9CC)  | 109.5     |
| H(9CB)-C(9C)-H(9CC)  | 109.5     |
| C(6C)-C(10C)-C(12C)  | 129(2)    |
| C(6C)-C(10C)-C(11C)  | 117(2)    |
| C(12C)-C(10C)-C(11C) | 105(2)    |
| C(6C)-C(10C)-H(10C)  | 100.1     |
| C(12C)-C(10C)-H(10C) | 100.1     |
| C(11C)-C(10C)-H(10C) | 100.1     |
| C(10C)-C(11C)-H(11J) | 109.5     |
| C(10C)-C(11C)-H(11K) | 109.5     |
| H(11J)-C(11C)-H(11K) | 109.5     |
| C(10C)-C(11C)-H(11L) | 109.5     |
| H(11J)-C(11C)-H(11L) | 109.5     |
| H(11K)-C(11C)-H(11L) | 109.5     |



|                      |           |
|----------------------|-----------|
| C(10C)-C(12C)-H(12G) | 109.5     |
| C(10C)-C(12C)-H(12H) | 109.5     |
| H(12G)-C(12C)-H(12H) | 109.5     |
| C(10C)-C(12C)-H(12I) | 109.5     |
| H(12G)-C(12C)-H(12I) | 109.5     |
| H(12H)-C(12C)-H(12I) | 109.5     |
| C(2D)-C(1D)-C(6D)    | 121(2)    |
| C(2D)-C(1D)-N(21)    | 118.1(16) |
| C(6D)-C(1D)-N(21)    | 120.7(17) |
| C(1D)-C(2D)-C(3D)    | 116.9(19) |
| C(1D)-C(2D)-C(7C)    | 120.7(16) |
| C(3D)-C(2D)-C(7C)    | 122.4(18) |
| C(4D)-C(3D)-C(2D)    | 122(2)    |
| C(4D)-C(3D)-H(3D)    | 119.2     |
| C(2D)-C(3D)-H(3D)    | 119.2     |
| C(3D)-C(4D)-C(5D)    | 122(2)    |
| C(3D)-C(4D)-K(1)#1   | 98.0(15)  |
| C(5D)-C(4D)-K(1)#1   | 116.3(17) |
| C(3D)-C(4D)-H(4D)    | 119.0     |
| C(5D)-C(4D)-H(4D)    | 119.0     |
| K(1)#1-C(4D)-H(4D)   | 53.1      |
| C(6D)-C(5D)-C(4D)    | 116(2)    |
| C(6D)-C(5D)-H(5D)    | 122.2     |
| C(4D)-C(5D)-H(5D)    | 122.2     |
| C(5D)-C(6D)-C(1D)    | 123(2)    |
| C(5D)-C(6D)-C(10D)   | 118(2)    |
| C(1D)-C(6D)-C(10D)   | 119(2)    |
| C(2C)-C(7D)-C(9D)    | 114.2(16) |
| C(2C)-C(7D)-C(8D)    | 112.6(15) |
| C(9D)-C(7D)-C(8D)    | 107.9(16) |
| C(2C)-C(7D)-H(7D)    | 107.3     |
| C(9D)-C(7D)-H(7D)    | 107.3     |
| C(8D)-C(7D)-H(7D)    | 107.3     |
| C(7D)-C(8D)-H(8DA)   | 109.5     |
| C(7D)-C(8D)-H(8DB)   | 109.5     |
| H(8DA)-C(8D)-H(8DB)  | 109.5     |

|                      |          |
|----------------------|----------|
| C(7D)-C(8D)-H(8DC)   | 109.5    |
| H(8DA)-C(8D)-H(8DC)  | 109.5    |
| H(8DB)-C(8D)-H(8DC)  | 109.5    |
| C(7D)-C(9D)-H(9DA)   | 109.5    |
| C(7D)-C(9D)-H(9DB)   | 109.5    |
| H(9DA)-C(9D)-H(9DB)  | 109.5    |
| C(7D)-C(9D)-H(9DC)   | 109.5    |
| H(9DA)-C(9D)-H(9DC)  | 109.5    |
| H(9DB)-C(9D)-H(9DC)  | 109.5    |
| C(6D)-C(10D)-C(11D)  | 96(3)    |
| C(6D)-C(10D)-C(12D)  | 93(2)    |
| C(11D)-C(10D)-C(12D) | 113(3)   |
| C(6D)-C(10D)-H(10D)  | 116.9    |
| C(11D)-C(10D)-H(10D) | 116.9    |
| C(12D)-C(10D)-H(10D) | 116.9    |
| C(10D)-C(11D)-H(11M) | 109.5    |
| C(10D)-C(11D)-H(11N) | 109.5    |
| H(11M)-C(11D)-H(11N) | 109.5    |
| C(10D)-C(11D)-H(11O) | 109.5    |
| H(11M)-C(11D)-H(11O) | 109.5    |
| H(11N)-C(11D)-H(11O) | 109.5    |
| C(10D)-C(12D)-H(12J) | 109.5    |
| C(10D)-C(12D)-H(12K) | 109.5    |
| H(12J)-C(12D)-H(12K) | 109.5    |
| C(10D)-C(12D)-H(12L) | 109.5    |
| H(12J)-C(12D)-H(12L) | 109.5    |
| H(12K)-C(12D)-H(12L) | 109.5    |
| O(10)-K(1)-O(20)     | 61.2(3)  |
| O(10)-K(1)-O(60)     | 60.1(2)  |
| O(20)-K(1)-O(60)     | 121.2(3) |
| O(10)-K(1)-O(30)     | 121.6(3) |
| O(20)-K(1)-O(30)     | 60.8(4)  |
| O(60)-K(1)-O(30)     | 171.2(3) |
| O(10)-K(1)-O(50)     | 119.7(3) |
| O(20)-K(1)-O(50)     | 168.9(4) |
| O(60)-K(1)-O(50)     | 60.3(3)  |

|                     |           |
|---------------------|-----------|
| O(30)-K(1)-O(50)    | 116.0(3)  |
| O(10)-K(1)-O(40)    | 172.2(4)  |
| O(20)-K(1)-O(40)    | 119.4(4)  |
| O(60)-K(1)-O(40)    | 118.3(3)  |
| O(30)-K(1)-O(40)    | 58.6(4)   |
| O(50)-K(1)-O(40)    | 58.1(3)   |
| C(120)-O(10)-C(10)  | 116.6(11) |
| C(120)-O(10)-K(1)   | 121.4(8)  |
| C(10)-O(10)-K(1)    | 119.1(8)  |
| C(20)-O(20)-C(30)   | 125.6(15) |
| C(20)-O(20)-K(1)    | 115.3(10) |
| C(30)-O(20)-K(1)    | 116.7(11) |
| C(40)-O(30)-C(50)   | 121.2(14) |
| C(40)-O(30)-K(1)    | 118.2(10) |
| C(50)-O(30)-K(1)    | 117.3(10) |
| C(60)-O(40)-C(70)   | 123.9(14) |
| C(60)-O(40)-K(1)    | 118.3(11) |
| C(70)-O(40)-K(1)    | 116.6(8)  |
| C(80)-O(50)-C(90)   | 119.7(13) |
| C(80)-O(50)-K(1)    | 118.6(11) |
| C(90)-O(50)-K(1)    | 115.5(8)  |
| C(100)-O(60)-C(110) | 128.2(11) |
| C(100)-O(60)-K(1)   | 113.5(9)  |
| C(110)-O(60)-K(1)   | 118.3(8)  |
| O(10)-C(10)-C(20)   | 115.5(15) |
| O(10)-C(10)-H(10E)  | 108.4     |
| C(20)-C(10)-H(10E)  | 108.4     |
| O(10)-C(10)-H(10F)  | 108.4     |
| C(20)-C(10)-H(10F)  | 108.4     |
| H(10E)-C(10)-H(10F) | 107.5     |
| O(20)-C(20)-C(10)   | 124.5(16) |
| O(20)-C(20)-K(1)    | 45.3(8)   |
| C(10)-C(20)-K(1)    | 80.3(10)  |
| O(20)-C(20)-H(20A)  | 106.2     |
| C(10)-C(20)-H(20A)  | 106.2     |
| K(1)-C(20)-H(20A)   | 135.0     |

|                     |           |
|---------------------|-----------|
| O(20)-C(20)-H(20B)  | 106.2     |
| C(10)-C(20)-H(20B)  | 106.2     |
| K(1)-C(20)-H(20B)   | 114.5     |
| H(20A)-C(20)-H(20B) | 106.4     |
| O(20)-C(30)-C(40)   | 121.8(16) |
| O(20)-C(30)-H(30A)  | 106.9     |
| C(40)-C(30)-H(30A)  | 106.9     |
| O(20)-C(30)-H(30B)  | 106.9     |
| C(40)-C(30)-H(30B)  | 106.9     |
| H(30A)-C(30)-H(30B) | 106.7     |
| O(30)-C(40)-C(30)   | 118.9(16) |
| O(30)-C(40)-H(40A)  | 107.6     |
| C(30)-C(40)-H(40A)  | 107.6     |
| O(30)-C(40)-H(40B)  | 107.6     |
| C(30)-C(40)-H(40B)  | 107.6     |
| H(40A)-C(40)-H(40B) | 107.0     |
| O(30)-C(50)-C(60)   | 120.1(15) |
| O(30)-C(50)-H(50A)  | 107.3     |
| C(60)-C(50)-H(50A)  | 107.3     |
| O(30)-C(50)-H(50B)  | 107.3     |
| C(60)-C(50)-H(50B)  | 107.3     |
| H(50A)-C(50)-H(50B) | 106.9     |
| O(40)-C(60)-C(50)   | 119.1(15) |
| O(40)-C(60)-H(60A)  | 107.5     |
| C(50)-C(60)-H(60A)  | 107.5     |
| O(40)-C(60)-H(60B)  | 107.5     |
| C(50)-C(60)-H(60B)  | 107.5     |
| H(60A)-C(60)-H(60B) | 107.0     |
| O(40)-C(70)-C(80)   | 118.0(14) |
| O(40)-C(70)-H(70A)  | 107.8     |
| C(80)-C(70)-H(70A)  | 107.8     |
| O(40)-C(70)-H(70B)  | 107.8     |
| C(80)-C(70)-H(70B)  | 107.8     |
| H(70A)-C(70)-H(70B) | 107.1     |
| O(50)-C(80)-C(70)   | 118.8(16) |
| O(50)-C(80)-H(80A)  | 107.6     |

|                      |           |
|----------------------|-----------|
| C(70)-C(80)-H(80A)   | 107.6     |
| O(50)-C(80)-H(80B)   | 107.6     |
| C(70)-C(80)-H(80B)   | 107.6     |
| H(80A)-C(80)-H(80B)  | 107.0     |
| O(50)-C(90)-C(100)   | 115.2(13) |
| O(50)-C(90)-H(90A)   | 108.5     |
| C(100)-C(90)-H(90A)  | 108.5     |
| O(50)-C(90)-H(90B)   | 108.5     |
| C(100)-C(90)-H(90B)  | 108.5     |
| H(90A)-C(90)-H(90B)  | 107.5     |
| O(60)-C(100)-C(90)   | 130.6(16) |
| O(60)-C(100)-K(1)    | 46.7(7)   |
| C(90)-C(100)-K(1)    | 84.1(9)   |
| O(60)-C(100)-H(10G)  | 104.6     |
| C(90)-C(100)-H(10G)  | 104.6     |
| K(1)-C(100)-H(10G)   | 129.8     |
| O(60)-C(100)-H(10H)  | 104.6     |
| C(90)-C(100)-H(10H)  | 104.6     |
| K(1)-C(100)-H(10H)   | 120.0     |
| H(10G)-C(100)-H(10H) | 105.7     |
| O(60)-C(110)-C(120)  | 120.1(12) |
| O(60)-C(110)-H(11P)  | 107.3     |
| C(120)-C(110)-H(11P) | 107.3     |
| O(60)-C(110)-H(11Q)  | 107.3     |
| C(120)-C(110)-H(11Q) | 107.3     |
| H(11P)-C(110)-H(11Q) | 106.9     |
| O(10)-C(120)-C(110)  | 117.8(11) |
| O(10)-C(120)-H(12M)  | 107.9     |
| C(110)-C(120)-H(12M) | 107.9     |
| O(10)-C(120)-H(12N)  | 107.9     |
| C(110)-C(120)-H(12N) | 107.9     |
| H(12M)-C(120)-H(12N) | 107.2     |

---

Symmetry transformations used to generate equivalent atoms:

#1  $x-1/2, -y+3/2, -z$

Table S-16. Anisotropic displacement parameters ( $\text{\AA}^2 \times 10^3$ ) for **4**. The anisotropic displacement factor exponent takes the form:  $-2\pi^2 [ h^2 a^{*2} U^{11} + \dots + 2 h k a^* b^* U^{12} ]$

|        | U <sup>11</sup> | U <sup>22</sup> | U <sup>33</sup> | U <sup>23</sup> | U <sup>13</sup> | U <sup>12</sup> |
|--------|-----------------|-----------------|-----------------|-----------------|-----------------|-----------------|
| Fe(1)  | 37(1)           | 38(1)           | 37(1)           | -6(1)           | 2(1)            | -9(1)           |
| C(1)   | 45(4)           | 36(4)           | 68(6)           | 2(4)            | -2(4)           | -13(3)          |
| N(11)  | 50(4)           | 48(4)           | 32(3)           | 7(3)            | -7(3)           | -20(3)          |
| N(21)  | 27(3)           | 38(3)           | 48(4)           | -9(3)           | -4(3)           | -1(3)           |
| C(11)  | 75(7)           | 49(5)           | 52(5)           | 4(4)            | -14(5)          | -29(5)          |
| C(21)  | 52(5)           | 37(4)           | 42(5)           | -2(4)           | 3(4)            | -11(4)          |
| C(31)  | 47(5)           | 35(4)           | 44(5)           | 2(3)            | 12(4)           | -6(4)           |
| C(41)  | 29(4)           | 38(4)           | 45(4)           | -7(3)           | 4(3)            | -6(3)           |
| C(51)  | 32(4)           | 55(5)           | 61(5)           | -1(4)           | 2(4)            | -4(4)           |
| C(1A)  | 25(9)           | 56(12)          | 48(10)          | 0(9)            | -5(7)           | -2(8)           |
| C(2A)  | 47(9)           | 74(12)          | 41(9)           | 8(8)            | -6(7)           | 24(8)           |
| C(3A)  | 70(11)          | 210(30)         | 64(14)          | -39(19)         | -23(11)         | 62(14)          |
| C(4A)  | 61(12)          | 240(30)         | 59(14)          | -39(18)         | -7(11)          | 38(15)          |
| C(5A)  | 39(10)          | 190(30)         | 53(13)          | -28(16)         | 3(9)            | 3(12)           |
| C(6A)  | 42(9)           | 114(14)         | 50(10)          | -27(10)         | 2(7)            | -18(9)          |
| C(7A)  | 63(11)          | 63(9)           | 45(9)           | 6(8)            | -4(9)           | 15(8)           |
| C(8A)  | 61(13)          | 50(11)          | 56(11)          | 7(9)            | 5(9)            | 22(9)           |
| C(9A)  | 110(20)         | 68(10)          | 106(19)         | 21(10)          | 39(18)          | 33(10)          |
| C(10A) | 34(9)           | 118(14)         | 56(10)          | -46(10)         | -7(8)           | -25(9)          |
| C(11A) | 35(12)          | 123(14)         | 81(16)          | -45(11)         | 15(12)          | -23(10)         |
| C(12A) | 73(16)          | 124(18)         | 69(11)          | -52(11)         | 14(10)          | -58(14)         |
| C(1B)  | 71(12)          | 60(9)           | 36(8)           | 24(7)           | -15(8)          | -1(7)           |
| C(2B)  | 67(11)          | 68(10)          | 84(13)          | 1(9)            | -38(9)          | 4(8)            |
| C(3B)  | 75(11)          | 77(11)          | 93(14)          | -6(10)          | -47(10)         | -3(8)           |
| C(4B)  | 69(12)          | 76(11)          | 79(14)          | -1(10)          | -41(11)         | -11(9)          |
| C(5B)  | 71(10)          | 79(10)          | 45(9)           | 15(8)           | -30(8)          | -12(7)          |
| C(6B)  | 63(10)          | 80(9)           | 34(8)           | 14(6)           | -11(7)          | -13(7)          |
| C(7B)  | 92(15)          | 91(11)          | 108(15)         | -23(12)         | -71(13)         | 43(10)          |
| C(8B)  | 170(30)         | 103(19)         | 122(17)         | -8(14)          | -28(16)         | 81(18)          |
| C(9B)  | 120(20)         | 95(12)          | 170(30)         | -13(14)         | -70(20)         | 48(12)          |
| C(10B) | 59(10)          | 86(9)           | 37(7)           | -7(7)           | -15(7)          | -15(7)          |

|        |         |         |         |         |         |         |
|--------|---------|---------|---------|---------|---------|---------|
| C(11B) | 66(13)  | 95(11)  | 58(11)  | 2(9)    | -1(10)  | -14(9)  |
| C(12B) | 105(17) | 127(17) | 52(9)   | -26(10) | 14(10)  | -59(14) |
| C(1C)  | 27(4)   | 46(4)   | 29(8)   | 6(4)    | -11(6)  | -5(3)   |
| C(2C)  | 53(10)  | 51(7)   | 36(9)   | 4(6)    | -19(7)  | 1(6)    |
| C(3C)  | 74(13)  | 48(8)   | 38(8)   | 3(6)    | -27(8)  | -8(7)   |
| C(4C)  | 71(13)  | 54(8)   | 28(9)   | -3(6)   | -27(9)  | -11(7)  |
| C(5C)  | 46(10)  | 52(9)   | 33(8)   | 9(6)    | -7(7)   | -21(7)  |
| C(6C)  | 34(9)   | 49(7)   | 26(7)   | 2(5)    | -12(6)  | -18(6)  |
| C(7C)  | 55(10)  | 46(8)   | 23(9)   | 17(7)   | 1(7)    | 10(6)   |
| C(8C)  | 103(18) | 59(10)  | 55(15)  | 0(9)    | 19(14)  | -13(9)  |
| C(9C)  | 65(10)  | 36(10)  | 67(14)  | -2(9)   | 26(9)   | 6(7)    |
| C(10C) | 52(9)   | 46(8)   | 23(8)   | 6(6)    | 6(6)    | -17(6)  |
| C(11C) | 51(9)   | 51(12)  | 52(17)  | -16(12) | 2(7)    | -14(7)  |
| C(12C) | 44(12)  | 75(15)  | 62(14)  | -30(13) | 0(10)   | -8(9)   |
| C(1D)  | 27(4)   | 46(4)   | 29(8)   | 6(4)    | -11(6)  | -5(3)   |
| C(2D)  | 39(10)  | 48(7)   | 20(8)   | 12(6)   | -1(7)   | 8(6)    |
| C(3D)  | 56(13)  | 56(10)  | 23(9)   | 15(7)   | 0(9)    | 11(9)   |
| C(4D)  | 77(16)  | 72(12)  | 39(10)  | 0(8)    | 2(9)    | 6(10)   |
| C(5D)  | 52(13)  | 67(11)  | 33(9)   | -5(7)   | 3(8)    | -1(9)   |
| C(6D)  | 69(16)  | 58(9)   | 36(8)   | -3(6)   | -1(7)   | -10(8)  |
| C(7D)  | 77(10)  | 53(8)   | 34(8)   | 6(6)    | -11(7)  | 11(6)   |
| C(8D)  | 90(14)  | 54(8)   | 63(13)  | 9(8)    | -4(11)  | 10(7)   |
| C(9D)  | 80(10)  | 47(9)   | 74(13)  | 11(9)   | 9(9)    | 18(7)   |
| C(10D) | 72(14)  | 52(10)  | 37(12)  | -7(7)   | -9(9)   | -12(7)  |
| C(11D) | 79(13)  | 61(16)  | 37(17)  | -3(12)  | -6(9)   | -7(9)   |
| C(12D) | 73(18)  | 43(12)  | 47(13)  | -10(9)  | -16(13) | -2(10)  |
| K(1)   | 46(1)   | 38(1)   | 41(1)   | 2(1)    | -6(1)   | -8(1)   |
| O(10)  | 154(9)  | 79(6)   | 173(9)  | -43(6)  | -98(8)  | 27(6)   |
| O(20)  | 89(6)   | 142(8)  | 86(6)   | 19(6)   | -22(5)  | 18(6)   |
| O(30)  | 127(8)  | 163(8)  | 65(5)   | -7(5)   | -34(5)  | -53(7)  |
| O(40)  | 114(7)  | 138(9)  | 139(8)  | -84(7)  | -5(7)   | -7(6)   |
| O(50)  | 194(12) | 77(5)   | 90(6)   | 4(5)    | -38(7)  | 30(6)   |
| O(60)  | 94(6)   | 74(4)   | 70(5)   | -8(4)   | -30(4)  | 4(4)    |
| C(10)  | 58(6)   | 77(7)   | 128(9)  | 30(6)   | 3(6)    | 4(5)    |
| C(20)  | 210(20) | 110(10) | 179(13) | 2(9)    | -84(14) | 15(11)  |
| C(30)  | 121(12) | 178(12) | 93(8)   | 24(8)   | -49(8)  | -30(10) |

|        |         |         |         |          |          |         |
|--------|---------|---------|---------|----------|----------|---------|
| C(40)  | 240(20) | 202(12) | 143(17) | -19(10)  | -135(19) | 10(11)  |
| C(50)  | 155(15) | 167(11) | 141(15) | -70(9)   | -68(13)  | -35(8)  |
| C(60)  | 148(11) | 122(10) | 107(10) | -34(8)   | -4(9)    | -74(8)  |
| C(70)  | 135(10) | 77(8)   | 110(9)  | -34(7)   | 30(7)    | -10(7)  |
| C(80)  | 140(13) | 109(9)  | 153(11) | -45(8)   | 9(9)     | -6(9)   |
| C(90)  | 191(17) | 89(8)   | 127(10) | -16(7)   | -85(12)  | 74(9)   |
| C(100) | 227(18) | 107(8)  | 98(11)  | -23(7)   | -37(12)  | 73(10)  |
| C(110) | 300(30) | 133(10) | 280(20) | -136(13) | -240(30) | 112(14) |
| C(120) | 71(7)   | 95(8)   | 85(7)   | -22(6)   | 0(5)     | -8(6)   |

---



Table S-17. Hydrogen coordinates ( $\times 10^4$ ) and isotropic displacement parameters ( $\text{\AA}^2 \times 10^{-3}$ ) for **4**.

|        | x    | y    | z    | U(eq) |
|--------|------|------|------|-------|
| H(1A)  | 5529 | 7144 | 2284 | 75    |
| H(1B)  | 6093 | 6959 | 3274 | 75    |
| H(1C)  | 5358 | 7363 | 3493 | 75    |
| H(11A) | 4720 | 4879 | 5512 | 88    |
| H(11B) | 3764 | 4894 | 5605 | 88    |
| H(11C) | 4293 | 5332 | 6248 | 88    |
| H(31)  | 3105 | 5270 | 4236 | 51    |
| H(51A) | 2147 | 6027 | 2625 | 74    |
| H(51B) | 2271 | 5388 | 2818 | 74    |
| H(51C) | 2590 | 5666 | 1719 | 74    |
| H(3A)  | 7304 | 4918 | 4431 | 139   |
| H(4A)  | 7749 | 5399 | 5989 | 144   |
| H(5A)  | 6911 | 6023 | 6881 | 114   |
| H(7A)  | 5378 | 5029 | 3248 | 68    |
| H(8AA) | 5999 | 5425 | 1878 | 83    |
| H(8AB) | 6743 | 5020 | 2016 | 83    |
| H(8AC) | 6727 | 5585 | 2665 | 83    |
| H(9AA) | 6771 | 4373 | 3614 | 140   |
| H(9AB) | 6124 | 4237 | 2689 | 140   |
| H(9AC) | 5874 | 4217 | 3951 | 140   |
| H(10A) | 4942 | 6389 | 5906 | 83    |
| H(11D) | 6423 | 6890 | 6490 | 120   |
| H(11E) | 5597 | 7162 | 6867 | 120   |
| H(11F) | 5791 | 7093 | 5595 | 120   |
| H(12A) | 4893 | 5856 | 7466 | 132   |
| H(12B) | 4980 | 6468 | 7899 | 132   |
| H(12C) | 5743 | 6074 | 7885 | 132   |
| H(3B)  | 7195 | 5101 | 5097 | 98    |
| H(4B)  | 7437 | 5679 | 6617 | 90    |
| H(5B)  | 6542 | 6387 | 7014 | 78    |

|        |      |      |       |     |
|--------|------|------|-------|-----|
| H(7B)  | 5322 | 5010 | 3818  | 116 |
| H(8BA) | 5903 | 5380 | 2420  | 198 |
| H(8BB) | 6456 | 4848 | 2443  | 198 |
| H(8BC) | 6766 | 5401 | 2989  | 198 |
| H(9BA) | 6678 | 4335 | 4017  | 192 |
| H(9BB) | 5777 | 4169 | 3719  | 192 |
| H(9BC) | 6007 | 4321 | 4951  | 192 |
| H(10B) | 4653 | 6609 | 5597  | 72  |
| H(11G) | 5039 | 7460 | 6128  | 110 |
| H(11H) | 5884 | 7216 | 5754  | 110 |
| H(11I) | 5656 | 7237 | 7023  | 110 |
| H(12D) | 5006 | 6310 | 7788  | 142 |
| H(12E) | 4179 | 6237 | 7144  | 142 |
| H(12F) | 4433 | 6824 | 7594  | 142 |
| H(3C)  | 3208 | 7725 | 838   | 64  |
| H(4C)  | 3420 | 7293 | -865  | 61  |
| H(5C)  | 3580 | 6335 | -903  | 52  |
| H(7C)  | 3634 | 7200 | 3001  | 49  |
| H(8CA) | 3803 | 8026 | 1483  | 108 |
| H(8CB) | 4073 | 8037 | 2738  | 108 |
| H(8CC) | 3184 | 8216 | 2405  | 108 |
| H(9CA) | 2185 | 7696 | 2312  | 84  |
| H(9CB) | 2380 | 7422 | 3468  | 84  |
| H(9CC) | 2179 | 7048 | 2433  | 84  |
| H(10C) | 3821 | 5477 | 1322  | 48  |
| H(11J) | 5195 | 5698 | 64    | 76  |
| H(11K) | 5036 | 5149 | 731   | 76  |
| H(11L) | 5130 | 5714 | 1368  | 76  |
| H(12G) | 3128 | 5124 | -84   | 91  |
| H(12H) | 3997 | 4848 | -62   | 91  |
| H(12I) | 3794 | 5306 | -950  | 91  |
| H(3D)  | 3330 | 7597 | 206   | 54  |
| H(4D)  | 3506 | 7042 | -1309 | 75  |
| H(5D)  | 3716 | 6087 | -1118 | 61  |
| H(7D)  | 3777 | 7205 | 3387  | 66  |
| H(8DA) | 3861 | 8067 | 2406  | 103 |

|        |      |      |       |     |
|--------|------|------|-------|-----|
| H(8DB) | 3448 | 8109 | 3583  | 103 |
| H(8DC) | 2907 | 8108 | 2504  | 103 |
| H(9DA) | 2292 | 7515 | 3756  | 100 |
| H(9DB) | 2635 | 6923 | 4039  | 100 |
| H(9DC) | 2174 | 7024 | 2910  | 100 |
| H(10D) | 3920 | 5382 | 1475  | 65  |
| H(11M) | 4885 | 5814 | -348  | 88  |
| H(11N) | 5146 | 5274 | 292   | 88  |
| H(11O) | 5162 | 5850 | 902   | 88  |
| H(12J) | 3217 | 5638 | -593  | 81  |
| H(12K) | 3015 | 5109 | 119   | 81  |
| H(12L) | 3760 | 5104 | -704  | 81  |
| H(10E) | 6822 | 9499 | 2516  | 105 |
| H(10F) | 6105 | 9184 | 3104  | 105 |
| H(20A) | 5614 | 9243 | 1557  | 200 |
| H(20B) | 6458 | 9285 | 969   | 200 |
| H(30A) | 6060 | 8714 | -446  | 157 |
| H(30B) | 5190 | 8698 | 79    | 157 |
| H(40A) | 5034 | 7880 | -223  | 234 |
| H(40B) | 5688 | 7995 | -1141 | 234 |
| H(50A) | 5837 | 7060 | -1055 | 186 |
| H(50B) | 5381 | 6960 | 68    | 186 |
| H(60A) | 6159 | 6313 | 159   | 151 |
| H(60B) | 6803 | 6586 | -628  | 151 |
| H(70A) | 7967 | 6453 | 547   | 129 |
| H(70B) | 7350 | 6019 | 1024  | 129 |
| H(80A) | 7568 | 6238 | 2665  | 161 |
| H(80B) | 8430 | 6277 | 2114  | 161 |
| H(90A) | 8885 | 6841 | 3493  | 163 |
| H(90B) | 8034 | 6768 | 4068  | 163 |
| H(10G) | 8329 | 7473 | 4710  | 173 |
| H(10H) | 8934 | 7621 | 3765  | 173 |
| H(11P) | 8513 | 8568 | 4059  | 282 |
| H(11Q) | 7872 | 8369 | 4933  | 282 |
| H(12M) | 7015 | 8893 | 4365  | 100 |
| H(12N) | 7726 | 9184 | 3719  | 100 |

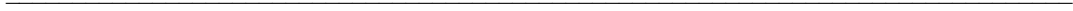

Table S-18. Torsion angles [°] for **4**.

---

|                          |            |
|--------------------------|------------|
| C(1B)-N(11)-C(21)-C(31)  | 175.9(13)  |
| C(1A)-N(11)-C(21)-C(31)  | -162.1(11) |
| Fe(1)-N(11)-C(21)-C(31)  | 6.1(12)    |
| C(1B)-N(11)-C(21)-C(11)  | 0.2(16)    |
| C(1A)-N(11)-C(21)-C(11)  | 22.2(14)   |
| Fe(1)-N(11)-C(21)-C(11)  | -169.6(6)  |
| N(11)-C(21)-C(31)-C(41)  | 3.0(14)    |
| C(11)-C(21)-C(31)-C(41)  | 178.7(8)   |
| C(1C)-N(21)-C(41)-C(31)  | 175.3(12)  |
| C(1D)-N(21)-C(41)-C(31)  | 164.7(13)  |
| Fe(1)-N(21)-C(41)-C(31)  | 0.1(10)    |
| C(1C)-N(21)-C(41)-C(51)  | -6.0(15)   |
| C(1D)-N(21)-C(41)-C(51)  | -16.6(15)  |
| Fe(1)-N(21)-C(41)-C(51)  | 178.8(6)   |
| C(21)-C(31)-C(41)-N(21)  | -6.5(13)   |
| C(21)-C(31)-C(41)-C(51)  | 174.8(8)   |
| C(21)-N(11)-C(1A)-C(2A)  | 80(3)      |
| Fe(1)-N(11)-C(1A)-C(2A)  | -89(3)     |
| C(21)-N(11)-C(1A)-C(6A)  | -105(2)    |
| Fe(1)-N(11)-C(1A)-C(6A)  | 87(3)      |
| C(6A)-C(1A)-C(2A)-C(3A)  | -5(4)      |
| N(11)-C(1A)-C(2A)-C(3A)  | 171(3)     |
| C(6A)-C(1A)-C(2A)-C(7A)  | -172(2)    |
| N(11)-C(1A)-C(2A)-C(7A)  | 4(4)       |
| C(1A)-C(2A)-C(3A)-C(4A)  | 5(6)       |
| C(7A)-C(2A)-C(3A)-C(4A)  | 172(3)     |
| C(2A)-C(3A)-C(4A)-C(5A)  | -1(6)      |
| C(3A)-C(4A)-C(5A)-C(6A)  | -2(6)      |
| C(4A)-C(5A)-C(6A)-C(1A)  | 1(6)       |
| C(4A)-C(5A)-C(6A)-C(10A) | -176(3)    |
| C(2A)-C(1A)-C(6A)-C(5A)  | 2(5)       |
| N(11)-C(1A)-C(6A)-C(5A)  | -174(3)    |
| C(2A)-C(1A)-C(6A)-C(10A) | 180(2)     |
| N(11)-C(1A)-C(6A)-C(10A) | 4(4)       |

|                           |            |
|---------------------------|------------|
| C(3A)-C(2A)-C(7A)-C(9A)   | 50(4)      |
| C(1A)-C(2A)-C(7A)-C(9A)   | -142(3)    |
| C(3A)-C(2A)-C(7A)-C(8A)   | -72(3)     |
| C(1A)-C(2A)-C(7A)-C(8A)   | 97(3)      |
| C(5A)-C(6A)-C(10A)-C(11A) | 59(4)      |
| C(1A)-C(6A)-C(10A)-C(11A) | -119(3)    |
| C(5A)-C(6A)-C(10A)-C(12A) | -65(4)     |
| C(1A)-C(6A)-C(10A)-C(12A) | 117(3)     |
| C(21)-N(11)-C(1B)-C(2B)   | 83(2)      |
| Fe(1)-N(11)-C(1B)-C(2B)   | -107(2)    |
| C(21)-N(11)-C(1B)-C(6B)   | -100(2)    |
| Fe(1)-N(11)-C(1B)-C(6B)   | 70(3)      |
| N(11)-C(1B)-C(2B)-C(3B)   | 169(3)     |
| C(6B)-C(1B)-C(2B)-C(3B)   | -8(4)      |
| N(11)-C(1B)-C(2B)-C(7B)   | -2(4)      |
| C(6B)-C(1B)-C(2B)-C(7B)   | -179(2)    |
| C(1B)-C(2B)-C(3B)-C(4B)   | 10(4)      |
| C(7B)-C(2B)-C(3B)-C(4B)   | -179(2)    |
| C(2B)-C(3B)-C(4B)-C(5B)   | -7(4)      |
| C(3B)-C(4B)-C(5B)-C(6B)   | 5(4)       |
| C(4B)-C(5B)-C(6B)-C(1B)   | -4(3)      |
| C(4B)-C(5B)-C(6B)-C(10B)  | 179(2)     |
| N(11)-C(1B)-C(6B)-C(5B)   | -172(2)    |
| C(2B)-C(1B)-C(6B)-C(5B)   | 5(3)       |
| N(11)-C(1B)-C(6B)-C(10B)  | 6(3)       |
| C(2B)-C(1B)-C(6B)-C(10B)  | -177(2)    |
| C(1B)-C(2B)-C(7B)-C(9B)   | -138(3)    |
| C(3B)-C(2B)-C(7B)-C(9B)   | 50(3)      |
| C(1B)-C(2B)-C(7B)-C(8B)   | 92(3)      |
| C(3B)-C(2B)-C(7B)-C(8B)   | -80(3)     |
| C(5B)-C(6B)-C(10B)-C(12B) | -74(2)     |
| C(1B)-C(6B)-C(10B)-C(12B) | 108(2)     |
| C(5B)-C(6B)-C(10B)-C(11B) | 47(2)      |
| C(1B)-C(6B)-C(10B)-C(11B) | -130.8(19) |
| C(41)-N(21)-C(1C)-C(2C)   | 112(2)     |
| Fe(1)-N(21)-C(1C)-C(2C)   | -72(3)     |

|                           |            |
|---------------------------|------------|
| C(41)-N(21)-C(1C)-C(6C)   | -68(3)     |
| Fe(1)-N(21)-C(1C)-C(6C)   | 108(2)     |
| N(21)-C(1C)-C(2C)-C(3C)   | 177(2)     |
| C(6C)-C(1C)-C(2C)-C(3C)   | -3(4)      |
| N(21)-C(1C)-C(2C)-C(7D)   | -6(4)      |
| C(6C)-C(1C)-C(2C)-C(7D)   | 174(2)     |
| C(1C)-C(2C)-C(3C)-C(4C)   | -1(3)      |
| C(7D)-C(2C)-C(3C)-C(4C)   | -178(2)    |
| C(2C)-C(3C)-C(4C)-C(5C)   | 6(3)       |
| C(2C)-C(3C)-C(4C)-K(1)#1  | 128.5(17)  |
| C(3C)-C(4C)-C(5C)-C(6C)   | -7(3)      |
| K(1)#1-C(4C)-C(5C)-C(6C)  | -135.2(18) |
| C(4C)-C(5C)-C(6C)-C(1C)   | 3(3)       |
| C(4C)-C(5C)-C(6C)-C(10C)  | -168.3(19) |
| N(21)-C(1C)-C(6C)-C(5C)   | -178(2)    |
| C(2C)-C(1C)-C(6C)-C(5C)   | 2(4)       |
| N(21)-C(1C)-C(6C)-C(10C)  | -8(4)      |
| C(2C)-C(1C)-C(6C)-C(10C)  | 172(3)     |
| C(5C)-C(6C)-C(10C)-C(12C) | -45(3)     |
| C(1C)-C(6C)-C(10C)-C(12C) | 145(3)     |
| C(5C)-C(6C)-C(10C)-C(11C) | 96(3)      |
| C(1C)-C(6C)-C(10C)-C(11C) | -74(3)     |
| C(41)-N(21)-C(1D)-C(2D)   | 119(3)     |
| Fe(1)-N(21)-C(1D)-C(2D)   | -75(3)     |
| C(41)-N(21)-C(1D)-C(6D)   | -65(3)     |
| Fe(1)-N(21)-C(1D)-C(6D)   | 100(3)     |
| C(6D)-C(1D)-C(2D)-C(3D)   | -4(5)      |
| N(21)-C(1D)-C(2D)-C(3D)   | 172(2)     |
| C(6D)-C(1D)-C(2D)-C(7C)   | 178(3)     |
| N(21)-C(1D)-C(2D)-C(7C)   | -6(4)      |
| C(9C)-C(7C)-C(2D)-C(1D)   | -93(3)     |
| C(8C)-C(7C)-C(2D)-C(1D)   | 146(3)     |
| C(9C)-C(7C)-C(2D)-C(3D)   | 89(3)      |
| C(8C)-C(7C)-C(2D)-C(3D)   | -32(3)     |
| C(1D)-C(2D)-C(3D)-C(4D)   | 3(4)       |
| C(7C)-C(2D)-C(3D)-C(4D)   | -179(2)    |

|                           |            |
|---------------------------|------------|
| C(2D)-C(3D)-C(4D)-C(5D)   | 0(4)       |
| C(2D)-C(3D)-C(4D)-K(1)#1  | 128(2)     |
| C(3D)-C(4D)-C(5D)-C(6D)   | -3(4)      |
| K(1)#1-C(4D)-C(5D)-C(6D)  | -123(3)    |
| C(4D)-C(5D)-C(6D)-C(1D)   | 3(5)       |
| C(4D)-C(5D)-C(6D)-C(10D)  | -172(3)    |
| C(2D)-C(1D)-C(6D)-C(5D)   | 1(6)       |
| N(21)-C(1D)-C(6D)-C(5D)   | -175(3)    |
| C(2D)-C(1D)-C(6D)-C(10D)  | 175(4)     |
| N(21)-C(1D)-C(6D)-C(10D)  | 0(5)       |
| C(3C)-C(2C)-C(7D)-C(9D)   | 102(2)     |
| C(1C)-C(2C)-C(7D)-C(9D)   | -75(3)     |
| C(3C)-C(2C)-C(7D)-C(8D)   | -21(3)     |
| C(1C)-C(2C)-C(7D)-C(8D)   | 162(2)     |
| C(5D)-C(6D)-C(10D)-C(11D) | 70(4)      |
| C(1D)-C(6D)-C(10D)-C(11D) | -104(4)    |
| C(5D)-C(6D)-C(10D)-C(12D) | -43(4)     |
| C(1D)-C(6D)-C(10D)-C(12D) | 142(4)     |
| C(120)-O(10)-C(10)-C(20)  | 177.0(17)  |
| K(1)-O(10)-C(10)-C(20)    | -22(2)     |
| C(30)-O(20)-C(20)-C(10)   | -177(2)    |
| K(1)-O(20)-C(20)-C(10)    | -15(3)     |
| C(30)-O(20)-C(20)-K(1)    | -162(2)    |
| O(10)-C(10)-C(20)-O(20)   | 25(3)      |
| O(10)-C(10)-C(20)-K(1)    | 14.8(14)   |
| C(20)-O(20)-C(30)-C(40)   | -179(3)    |
| K(1)-O(20)-C(30)-C(40)    | 19(3)      |
| C(50)-O(30)-C(40)-C(30)   | 173(2)     |
| K(1)-O(30)-C(40)-C(30)    | 14(3)      |
| O(20)-C(30)-C(40)-O(30)   | -24(4)     |
| C(40)-O(30)-C(50)-C(60)   | 170(2)     |
| K(1)-O(30)-C(50)-C(60)    | -31(3)     |
| C(70)-O(40)-C(60)-C(50)   | -172(2)    |
| K(1)-O(40)-C(60)-C(50)    | -4(2)      |
| O(30)-C(50)-C(60)-O(40)   | 24(3)      |
| C(60)-O(40)-C(70)-C(80)   | -165.9(17) |



|                            |            |
|----------------------------|------------|
| K(1)-O(40)-C(70)-C(80)     | 27(2)      |
| C(90)-O(50)-C(80)-C(70)    | -179.0(19) |
| K(1)-O(50)-C(80)-C(70)     | 30(2)      |
| O(40)-C(70)-C(80)-O(50)    | -39(3)     |
| C(80)-O(50)-C(90)-C(100)   | -177(2)    |
| K(1)-O(50)-C(90)-C(100)    | -25(3)     |
| C(110)-O(60)-C(100)-C(90)  | 173(3)     |
| K(1)-O(60)-C(100)-C(90)    | -7(3)      |
| C(110)-O(60)-C(100)-K(1)   | 180(3)     |
| O(50)-C(90)-C(100)-O(60)   | 23(4)      |
| O(50)-C(90)-C(100)-K(1)    | 18.2(18)   |
| C(100)-O(60)-C(110)-C(120) | -178(2)    |
| K(1)-O(60)-C(110)-C(120)   | 2(4)       |
| C(10)-O(10)-C(120)-C(110)  | 179(2)     |
| K(1)-O(10)-C(120)-C(110)   | 19(2)      |
| O(60)-C(110)-C(120)-O(10)  | -14(4)     |

---

Symmetry transformations used to generate equivalent atoms:

#1  $x-1/2, -y+3/2, -z$

[L<sup>Me</sup>FeCH<sub>3</sub>][K(18-crown-6)(12-crown-4)] (**4'**) We also crystallographically characterized a crystal in which the potassium is bound by one 18-crown-6 and one 12-crown-4. Low-temperature diffraction data ( $\omega$ -scans) were collected on a Rigaku MicroMax-007HF diffractometer coupled to a Saturn994+ CCD detector with Cu K $\alpha$  ( $\lambda = 1.54178 \text{ \AA}$ ) for the structure of **4'**. The diffraction images were processed and scaled using Rigaku Oxford Diffraction software (CrysAlisPro; Rigaku OD: The Woodlands, TX, 2015). The structure was solved with SHELXT and was refined against  $F^2$  on all data by full-matrix least squares with SHELXL (Sheldrick, G. M. *Acta Cryst.* 2008, A64, 112–122). All non-hydrogen atoms were refined anisotropically. Hydrogen atoms were included in the model at geometrically calculated positions and refined using a riding model. The isotropic displacement parameters of all hydrogen atoms were fixed to 1.2 times the U value of the atoms to which they are linked (1.5 times for methyl groups). One of the 12-crown-4 molecules was modeled as disordered. The site occupancies of the disordered atoms were fixed to 0.5. Chemically equivalent C-C and C-O bonds for the disordered atoms were restrained to be similar. The disordered atoms thermal parameters were also restrained to behave as a rigid group. Restraints were also applied to "non-disordered" atoms of the other 18-crown-6/12-crown-4 potassium complexes. These sites are likely disordered, and generate a number of checkCIF alerts. However, the weak, twinned data did not strongly support additional parameters. Restraints and constraints were used to obtain a stable model that converged. Atom C310 is likely an average position of two disordered positions. Its close proximity to the crystallographic special position also caused the thermal parameters to be large. Its thermal parameters were subsequently constrained to the value of its neighbor, C320. The program SQUEEZE was used to compensate for the contribution of disordered solvents contained in voids within the crystal lattice from the diffraction intensities. This procedure was applied to the data file and the submitted model is based on the solvent removed data. Based on the total electron density found in the voids ( $175 \text{ e/\AA}^3$ ), it is likely that  $\sim 4$  ether molecules are present in the unit cell. See "\_platon\_squeeze\_details" in this .cif for more information. The full numbering scheme of compound **4'** can be found in the full details of the X-ray structure determination (CIF), which is included as Supporting Information.

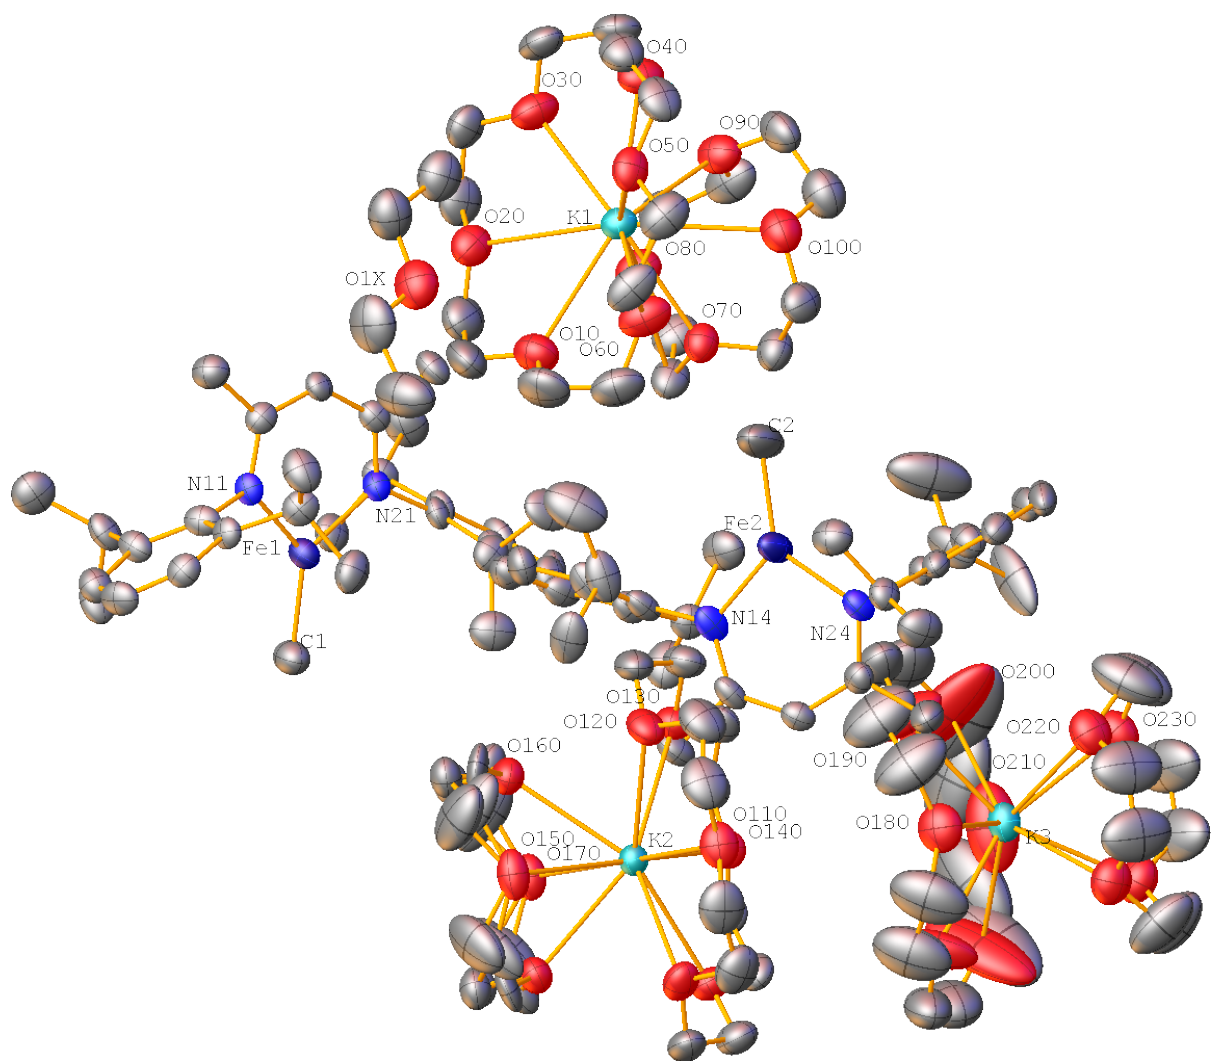

**Figure S-27:** A partial numbering scheme of **4'** with 50% thermal ellipsoid probability levels. The hydrogen atoms are shown as circles for clarity.

Table S-19. Crystal data and structure refinement for **4'**.

|                                   |                                                                  |                             |
|-----------------------------------|------------------------------------------------------------------|-----------------------------|
| Identification code               | 007-16130                                                        |                             |
| CSD Deposition Number             | 1944811                                                          |                             |
| Empirical formula                 | $C_{52}H_{89}FeKN_2O_{10.5}$                                     |                             |
| Formula weight                    | 1005.20                                                          |                             |
| Temperature                       | 93(2) K                                                          |                             |
| Wavelength                        | 1.54184 Å                                                        |                             |
| Crystal system                    | Monoclinic                                                       |                             |
| Space group                       | $P2_1/m$                                                         |                             |
| Unit cell dimensions              | $a = 12.8093(4)$ Å                                               | $\alpha = 90^\circ$ .       |
|                                   | $b = 49.1255(11)$ Å                                              | $\beta = 90.131(2)^\circ$ . |
|                                   | $c = 18.9290(4)$ Å                                               | $\gamma = 90^\circ$ .       |
| Volume                            | 11911.3(5) Å <sup>3</sup>                                        |                             |
| Z                                 | 8                                                                |                             |
| Density (calculated)              | 1.121 g/cm <sup>3</sup>                                          |                             |
| Absorption coefficient            | 3.067 mm <sup>-1</sup>                                           |                             |
| F(000)                            | 4352                                                             |                             |
| Crystal size                      | 0.050 x 0.050 x 0.020 mm <sup>3</sup>                            |                             |
| Crystal color and habit           | Red Plate                                                        |                             |
| Diffractometer                    | Rigaku Saturn 944+ CCD                                           |                             |
| Theta range for data collection   | 1.799 to 67.369°.                                                |                             |
| Index ranges                      | $-14 \leq h \leq 14$ , $-58 \leq k \leq 58$ , $0 \leq l \leq 22$ |                             |
| Reflections collected             | 21384                                                            |                             |
| Independent reflections           | 21384 [R(int) = 0.1394]                                          |                             |
| Observed reflections (I > 2σ(I))  | 17694                                                            |                             |
| Completeness to theta = 67.369°   | 98.7 %                                                           |                             |
| Absorption correction             | Semi-empirical from equivalents                                  |                             |
| Max. and min. transmission        | 1.00000 and 0.62537                                              |                             |
| Solution method                   | SHELXT-2014/5 (Sheldrick, 2014)                                  |                             |
| Refinement method                 | SHELXL-2014/7 (Sheldrick, 2014)                                  |                             |
| Data / restraints / parameters    | 21384 / 196 / 1265                                               |                             |
| Goodness-of-fit on F <sup>2</sup> | 1.119                                                            |                             |
| Final R indices [I > 2σ(I)]       | R1 = 0.0992, wR2 = 0.2324                                        |                             |
| R indices (all data)              | R1 = 0.1147, wR2 = 0.2420                                        |                             |
| Largest diff. peak and hole       | 0.956 and -0.866 e.Å <sup>-3</sup>                               |                             |

Table S-20. Atomic coordinates ( $\times 10^4$ ) and equivalent isotropic displacement parameters ( $\text{\AA}^2 \times 10^3$ ) for **4'**.  $U(\text{eq})$  is defined as one third of the trace of the orthogonalized  $U^{ij}$  tensor.

|        | x        | y       | z       | $U(\text{eq})$ |
|--------|----------|---------|---------|----------------|
| Fe(1)  | -1012(1) | 3900(1) | 4792(1) | 34(1)          |
| C(1)   | -1314(6) | 3513(1) | 4498(4) | 57(2)          |
| N(11)  | -1864(4) | 4169(1) | 5274(2) | 31(1)          |
| N(21)  | 238(4)   | 4120(1) | 4713(2) | 32(1)          |
| C(11)  | -2327(6) | 4630(1) | 5679(4) | 50(2)          |
| C(21)  | -1563(5) | 4432(1) | 5362(3) | 35(1)          |
| C(31)  | -573(4)  | 4524(1) | 5175(3) | 32(1)          |
| C(41)  | 286(5)   | 4385(1) | 4897(3) | 34(1)          |
| C(51)  | 1291(5)  | 4540(1) | 4816(3) | 44(2)          |
| C(12)  | -2751(5) | 4070(1) | 5639(3) | 37(1)          |
| C(22)  | -2657(5) | 4003(1) | 6374(3) | 33(1)          |
| C(32)  | -3491(5) | 3881(1) | 6707(3) | 38(1)          |
| C(42)  | -4385(5) | 3811(1) | 6350(3) | 46(2)          |
| C(52)  | -4482(6) | 3878(1) | 5641(3) | 45(2)          |
| C(62)  | -3682(5) | 4009(1) | 5284(3) | 38(1)          |
| C(72)  | -1639(6) | 4058(1) | 6767(3) | 44(2)          |
| C(82)  | -1031(6) | 3789(2) | 6852(4) | 57(2)          |
| C(92)  | -1787(6) | 4193(2) | 7481(4) | 61(2)          |
| C(102) | -3846(5) | 4086(1) | 4517(3) | 45(2)          |
| C(112) | -3950(6) | 3833(2) | 4052(4) | 59(2)          |
| C(122) | -4801(7) | 4272(2) | 4414(4) | 64(2)          |
| C(13)  | 1172(4)  | 3988(1) | 4467(3) | 33(1)          |
| C(23)  | 1764(5)  | 3823(1) | 4945(3) | 37(1)          |
| C(33)  | 2641(5)  | 3693(2) | 4675(3) | 47(2)          |
| C(43)  | 2940(5)  | 3718(2) | 3999(4) | 47(2)          |
| C(53)  | 2364(5)  | 3877(1) | 3537(3) | 42(2)          |
| C(63)  | 1468(5)  | 4012(1) | 3758(3) | 36(1)          |
| C(73)  | 1465(6)  | 3797(1) | 5710(3) | 45(2)          |
| C(83)  | 1262(7)  | 3499(2) | 5913(4) | 61(2)          |
| C(93)  | 2246(8)  | 3930(2) | 6196(4) | 68(2)          |
| C(103) | 815(5)   | 4173(1) | 3241(3) | 41(2)          |

|        |          |         |          |        |
|--------|----------|---------|----------|--------|
| C(113) | 115(6)   | 3981(2) | 2811(3)  | 49(2)  |
| C(123) | 1476(7)  | 4352(2) | 2751(4)  | 68(2)  |
| Fe(2)  | 4201(1)  | 3637(1) | 10205(1) | 52(1)  |
| C(2)   | 4149(9)  | 4047(2) | 10366(7) | 108(4) |
| N(14)  | 3240(4)  | 3385(1) | 9770(2)  | 40(1)  |
| N(24)  | 5215(4)  | 3372(1) | 10531(2) | 36(1)  |
| C(14)  | 2551(6)  | 2927(1) | 9458(4)  | 51(2)  |
| C(24)  | 3375(5)  | 3110(1) | 9783(3)  | 36(1)  |
| C(34)  | 4231(5)  | 2986(1) | 10091(3) | 37(1)  |
| C(44)  | 5099(5)  | 3097(1) | 10441(3) | 38(1)  |
| C(54)  | 5940(6)  | 2913(1) | 10730(5) | 59(2)  |
| C(15)  | 2386(5)  | 3492(1) | 9378(3)  | 42(2)  |
| C(25)  | 2441(5)  | 3497(1) | 8623(3)  | 38(1)  |
| C(35)  | 1586(6)  | 3597(1) | 8259(3)  | 44(2)  |
| C(45)  | 700(6)   | 3692(1) | 8579(4)  | 47(2)  |
| C(55)  | 685(5)   | 3705(2) | 9324(4)  | 49(2)  |
| C(65)  | 1507(5)  | 3604(1) | 9716(3)  | 46(2)  |
| C(75)  | 3418(6)  | 3417(1) | 8247(3)  | 44(2)  |
| C(85)  | 4119(7)  | 3669(2) | 8158(5)  | 64(2)  |
| C(95)  | 3243(7)  | 3269(2) | 7553(4)  | 70(2)  |
| C(105) | 1467(6)  | 3613(2) | 10515(3) | 61(2)  |
| C(115) | 1106(11) | 3888(2) | 10790(5) | 103(4) |
| C(125) | 735(6)   | 3395(2) | 10789(4) | 67(2)  |
| C(16)  | 6100(5)  | 3468(1) | 10902(3) | 35(1)  |
| C(26)  | 6983(6)  | 3562(2) | 10545(4) | 50(2)  |
| C(36)  | 7803(5)  | 3666(1) | 10920(4) | 53(2)  |
| C(46)  | 7812(6)  | 3675(2) | 11644(5) | 56(2)  |
| C(56)  | 6943(6)  | 3580(1) | 12011(4) | 49(2)  |
| C(66)  | 6082(5)  | 3479(1) | 11651(3) | 35(1)  |
| C(76)  | 6993(7)  | 3551(2) | 9745(4)  | 70(2)  |
| C(86)  | 7951(7)  | 3397(3) | 9475(6)  | 122(5) |
| C(96)  | 6917(15) | 3834(3) | 9410(7)  | 156(7) |
| C(106) | 5112(5)  | 3389(1) | 12046(3) | 40(1)  |
| C(116) | 4401(6)  | 3629(2) | 12213(4) | 56(2)  |
| C(126) | 5337(7)  | 3235(2) | 12737(4) | 67(2)  |
| K(1)   | 3340(1)  | 4968(1) | 7858(1)  | 43(1)  |

|        |          |         |          |       |
|--------|----------|---------|----------|-------|
| O(10)  | 1852(5)  | 4516(1) | 7800(3)  | 70(2) |
| O(20)  | 1398(4)  | 4966(1) | 6945(3)  | 62(1) |
| O(30)  | 2599(5)  | 5444(1) | 7021(3)  | 70(2) |
| O(40)  | 3821(5)  | 5513(1) | 8287(3)  | 65(2) |
| O(50)  | 3116(4)  | 5155(1) | 9351(3)  | 59(1) |
| O(60)  | 3131(5)  | 4590(1) | 9037(3)  | 74(2) |
| O(70)  | 4389(4)  | 4473(1) | 7662(2)  | 53(1) |
| O(80)  | 4003(5)  | 4791(1) | 6455(3)  | 66(1) |
| O(90)  | 5203(5)  | 5185(1) | 7201(3)  | 66(2) |
| O(100) | 5552(5)  | 4852(1) | 8427(3)  | 69(2) |
| C(10)  | 946(8)   | 4534(2) | 7372(6)  | 84(3) |
| C(20)  | 1179(8)  | 4694(2) | 6764(5)  | 83(3) |
| C(30)  | 1516(8)  | 5146(2) | 6371(4)  | 73(2) |
| C(40)  | 1664(7)  | 5424(2) | 6626(4)  | 63(2) |
| C(50)  | 2727(7)  | 5696(2) | 7339(5)  | 67(2) |
| C(60)  | 3763(7)  | 5707(2) | 7717(5)  | 68(2) |
| C(70)  | 3378(8)  | 5609(2) | 8916(5)  | 72(2) |
| C(80)  | 3656(7)  | 5404(2) | 9475(4)  | 68(2) |
| C(90)  | 3369(8)  | 4954(2) | 9831(4)  | 76(3) |
| C(100) | 2782(8)  | 4701(2) | 9674(4)  | 71(3) |
| C(110) | 2649(9)  | 4338(2) | 8836(5)  | 81(3) |
| C(120) | 1674(9)  | 4377(2) | 8452(5)  | 83(3) |
| C(130) | 4074(7)  | 4358(2) | 7003(4)  | 60(2) |
| C(140) | 4445(8)  | 4527(2) | 6391(4)  | 69(2) |
| C(150) | 4602(8)  | 4999(2) | 6124(5)  | 76(3) |
| C(160) | 5541(8)  | 5084(2) | 6546(5)  | 81(3) |
| C(170) | 5991(7)  | 5234(2) | 7708(5)  | 76(3) |
| C(180) | 6397(8)  | 4974(2) | 8049(5)  | 84(3) |
| C(190) | 5668(7)  | 4568(2) | 8513(4)  | 66(2) |
| C(200) | 5406(6)  | 4407(2) | 7851(4)  | 61(2) |
| K(2)   | 544(1)   | 2500    | 12844(1) | 36(1) |
| O(110) | 1350(6)  | 2500    | 14325(3) | 59(2) |
| O(120) | 713(4)   | 2992(1) | 13688(3) | 58(1) |
| O(130) | 1605(4)  | 3005(1) | 12325(3) | 53(1) |
| O(140) | 2326(5)  | 2500    | 11834(3) | 45(2) |
| O(150) | -1527(5) | 2500    | 13552(3) | 59(2) |

|        |           |         |           |         |
|--------|-----------|---------|-----------|---------|
| O(160) | -1045(4)  | 2886(1) | 12498(2)  | 52(1)   |
| C(210) | 1125(8)   | 2740(2) | 14712(4)  | 79(3)   |
| C(220) | 1373(8)   | 2981(2) | 14280(5)  | 77(3)   |
| C(230) | 801(7)    | 3236(2) | 13285(5)  | 65(2)   |
| C(240) | 1728(7)   | 3227(2) | 12811(5)  | 63(2)   |
| C(250) | 2464(6)   | 2979(2) | 11881(4)  | 56(2)   |
| C(260) | 2317(6)   | 2741(2) | 11401(4)  | 57(2)   |
| C(8X)  | -2202(17) | 2745(2) | 13517(16) | 123(10) |
| C(7Y)  | -2068(9)  | 2911(3) | 12777(8)  | 54(3)   |
| C(6X)  | -1707(12) | 2892(3) | 11892(7)  | 56(3)   |
| C(5Y)  | -1205(19) | 2736(2) | 11245(11) | 86(7)   |
| O(170) | -572(5)   | 2500    | 11448(3)  | 56(2)   |
| K(3)   | 8000(2)   | 2500    | 7411(1)   | 45(1)   |
| O(180) | 6620(7)   | 2500    | 8621(4)   | 73(2)   |
| O(190) | 6619(9)   | 2950(2) | 7694(4)   | 131(4)  |
| O(200) | 7698(13)  | 2967(3) | 6479(6)   | 265(9)  |
| O(220) | 9078(5)   | 2788(1) | 8573(3)   | 70(2)   |
| O(230) | 9941(5)   | 2786(1) | 7205(3)   | 68(2)   |
| C(310) | 6260(14)  | 2757(2) | 8764(7)   | 144(4)  |
| C(320) | 6048(14)  | 2958(3) | 8297(7)   | 144(4)  |
| C(330) | 6524(9)   | 3166(2) | 7258(7)   | 103(3)  |
| C(360) | 8062(16)  | 2711(3) | 5446(9)   | 254(8)  |
| C(370) | 9358(13)  | 2630(2) | 9132(5)   | 129(5)  |
| C(380) | 9811(12)  | 2972(3) | 8364(6)   | 126(5)  |
| C(390) | 10220(11) | 2970(3) | 7713(6)   | 115(4)  |
| O(1X)  | -223(5)   | 4828(1) | 9069(3)   | 80(2)   |
| C(3X)  | -418(8)   | 5110(2) | 8910(6)   | 86(3)   |
| C(4X)  | 501(8)    | 5233(2) | 8609(5)   | 82(3)   |
| C(1X)  | -789(10)  | 4411(2) | 9575(7)   | 109(4)  |
| C(2X)  | -1060(8)  | 4699(2) | 9376(6)   | 93(3)   |
| C(400) | 10725(10) | 2634(2) | 6929(8)   | 144(6)  |
| O(210) | 8342(12)  | 2500    | 5842(7)   | 167(6)  |
| C(340) | 7097(12)  | 3158(3) | 6658(7)   | 125(4)  |
| C(350) | 8191(16)  | 2950(4) | 5813(7)   | 229(8)  |
| C(5X)  | -1020(20) | 2777(4) | 11421(10) | 87(6)   |
| C(6Y)  | -1053(15) | 2934(3) | 11718(6)  | 63(4)   |



|       |           |         |           |        |
|-------|-----------|---------|-----------|--------|
| C(7X) | -1698(11) | 2928(4) | 13143(7)  | 59(3)  |
| C(8Y) | -1920(20) | 2778(4) | 13411(10) | 103(8) |

---

Table S-21. Bond lengths [Å] and angles [°] for **4'**.

---

|              |           |
|--------------|-----------|
| Fe(1)-N(21)  | 1.938(5)  |
| Fe(1)-N(11)  | 1.942(5)  |
| Fe(1)-C(1)   | 2.016(7)  |
| C(1)-H(1A)   | 0.9800    |
| C(1)-H(1B)   | 0.9800    |
| C(1)-H(1C)   | 0.9800    |
| N(11)-C(21)  | 1.361(7)  |
| N(11)-C(12)  | 1.417(7)  |
| N(21)-C(41)  | 1.349(7)  |
| N(21)-C(13)  | 1.438(7)  |
| C(11)-C(21)  | 1.505(9)  |
| C(11)-H(11G) | 0.9800    |
| C(11)-H(11H) | 0.9800    |
| C(11)-H(11I) | 0.9800    |
| C(21)-C(31)  | 1.393(8)  |
| C(31)-C(41)  | 1.401(8)  |
| C(31)-H(31)  | 0.9500    |
| C(41)-C(51)  | 1.503(8)  |
| C(51)-H(51A) | 0.9800    |
| C(51)-H(51B) | 0.9800    |
| C(51)-H(51C) | 0.9800    |
| C(12)-C(62)  | 1.399(9)  |
| C(12)-C(22)  | 1.434(8)  |
| C(22)-C(32)  | 1.380(8)  |
| C(22)-C(72)  | 1.523(9)  |
| C(32)-C(42)  | 1.372(10) |
| C(32)-H(32)  | 0.9500    |
| C(42)-C(52)  | 1.389(9)  |
| C(42)-H(42)  | 0.9500    |
| C(52)-C(62)  | 1.386(9)  |
| C(52)-H(52)  | 0.9500    |
| C(62)-C(102) | 1.514(9)  |
| C(72)-C(92)  | 1.519(9)  |
| C(72)-C(82)  | 1.543(10) |

|               |           |
|---------------|-----------|
| C(72)-H(72)   | 1.0000    |
| C(82)-H(82A)  | 0.9800    |
| C(82)-H(82B)  | 0.9800    |
| C(82)-H(82C)  | 0.9800    |
| C(92)-H(92A)  | 0.9800    |
| C(92)-H(92B)  | 0.9800    |
| C(92)-H(92C)  | 0.9800    |
| C(102)-C(112) | 1.529(9)  |
| C(102)-C(122) | 1.538(11) |
| C(102)-H(102) | 1.0000    |
| C(112)-H(11J) | 0.9800    |
| C(112)-H(11K) | 0.9800    |
| C(112)-H(11L) | 0.9800    |
| C(122)-H(12G) | 0.9800    |
| C(122)-H(12H) | 0.9800    |
| C(122)-H(12I) | 0.9800    |
| C(13)-C(63)   | 1.401(8)  |
| C(13)-C(23)   | 1.433(8)  |
| C(23)-C(33)   | 1.389(9)  |
| C(23)-C(73)   | 1.505(8)  |
| C(33)-C(43)   | 1.343(10) |
| C(33)-H(33)   | 0.9500    |
| C(43)-C(53)   | 1.384(10) |
| C(43)-H(43)   | 0.9500    |
| C(53)-C(63)   | 1.390(9)  |
| C(53)-H(53)   | 0.9500    |
| C(63)-C(103)  | 1.508(9)  |
| C(73)-C(93)   | 1.504(10) |
| C(73)-C(83)   | 1.534(10) |
| C(73)-H(73)   | 1.0000    |
| C(83)-H(83A)  | 0.9800    |
| C(83)-H(83B)  | 0.9800    |
| C(83)-H(83C)  | 0.9800    |
| C(93)-H(93A)  | 0.9800    |
| C(93)-H(93B)  | 0.9800    |
| C(93)-H(93C)  | 0.9800    |

|               |           |
|---------------|-----------|
| C(103)-C(113) | 1.532(9)  |
| C(103)-C(123) | 1.536(9)  |
| C(103)-H(103) | 1.0000    |
| C(113)-H(11M) | 0.9800    |
| C(113)-H(11N) | 0.9800    |
| C(113)-H(11O) | 0.9800    |
| C(123)-H(12J) | 0.9800    |
| C(123)-H(12K) | 0.9800    |
| C(123)-H(12L) | 0.9800    |
| Fe(2)-N(14)   | 1.929(5)  |
| Fe(2)-N(24)   | 1.938(5)  |
| Fe(2)-C(2)    | 2.038(9)  |
| C(2)-H(0AA)   | 0.9800    |
| C(2)-H(0AB)   | 0.9800    |
| C(2)-H(0AC)   | 0.9800    |
| N(14)-C(24)   | 1.359(8)  |
| N(14)-C(15)   | 1.422(8)  |
| N(24)-C(44)   | 1.370(8)  |
| N(24)-C(16)   | 1.414(8)  |
| C(14)-C(24)   | 1.516(8)  |
| C(14)-H(14A)  | 0.9800    |
| C(14)-H(14B)  | 0.9800    |
| C(14)-H(14C)  | 0.9800    |
| C(24)-C(34)   | 1.383(9)  |
| C(34)-C(44)   | 1.403(9)  |
| C(34)-H(34)   | 0.9500    |
| C(44)-C(54)   | 1.507(9)  |
| C(54)-H(54A)  | 0.9800    |
| C(54)-H(54B)  | 0.9800    |
| C(54)-H(54C)  | 0.9800    |
| C(15)-C(65)   | 1.409(10) |
| C(15)-C(25)   | 1.431(8)  |
| C(25)-C(35)   | 1.381(9)  |
| C(25)-C(75)   | 1.495(9)  |
| C(35)-C(45)   | 1.370(10) |
| C(35)-H(35)   | 0.9500    |

|               |           |
|---------------|-----------|
| C(45)-C(55)   | 1.412(10) |
| C(45)-H(45)   | 0.9500    |
| C(55)-C(65)   | 1.378(10) |
| C(55)-H(55)   | 0.9500    |
| C(65)-C(105)  | 1.515(9)  |
| C(75)-C(95)   | 1.516(10) |
| C(75)-C(85)   | 1.543(10) |
| C(75)-H(75)   | 1.0000    |
| C(85)-H(85A)  | 0.9800    |
| C(85)-H(85B)  | 0.9800    |
| C(85)-H(85C)  | 0.9800    |
| C(95)-H(95A)  | 0.9800    |
| C(95)-H(95B)  | 0.9800    |
| C(95)-H(95C)  | 0.9800    |
| C(105)-C(125) | 1.517(11) |
| C(105)-C(115) | 1.519(14) |
| C(105)-H(105) | 1.0000    |
| C(115)-H(11A) | 0.9800    |
| C(115)-H(11B) | 0.9800    |
| C(115)-H(11C) | 0.9800    |
| C(125)-H(12A) | 0.9800    |
| C(125)-H(12B) | 0.9800    |
| C(125)-H(12C) | 0.9800    |
| C(16)-C(26)   | 1.398(9)  |
| C(16)-C(66)   | 1.419(9)  |
| C(26)-C(36)   | 1.367(10) |
| C(26)-C(76)   | 1.514(11) |
| C(36)-C(46)   | 1.371(11) |
| C(36)-H(36)   | 0.9500    |
| C(46)-C(56)   | 1.394(11) |
| C(46)-H(46)   | 0.9500    |
| C(56)-C(66)   | 1.387(9)  |
| C(56)-H(56)   | 0.9500    |
| C(66)-C(106)  | 1.518(9)  |
| C(76)-C(86)   | 1.530(13) |
| C(76)-C(96)   | 1.533(15) |

|               |           |
|---------------|-----------|
| C(76)-H(76)   | 1.0000    |
| C(86)-H(86A)  | 0.9800    |
| C(86)-H(86B)  | 0.9800    |
| C(86)-H(86C)  | 0.9800    |
| C(96)-H(96A)  | 0.9800    |
| C(96)-H(96B)  | 0.9800    |
| C(96)-H(96C)  | 0.9800    |
| C(106)-C(116) | 1.525(9)  |
| C(106)-C(126) | 1.537(10) |
| C(106)-H(106) | 1.0000    |
| C(116)-H(11D) | 0.9800    |
| C(116)-H(11E) | 0.9800    |
| C(116)-H(11F) | 0.9800    |
| C(126)-H(12D) | 0.9800    |
| C(126)-H(12E) | 0.9800    |
| C(126)-H(12F) | 0.9800    |
| K(1)-O(70)    | 2.802(5)  |
| K(1)-O(40)    | 2.866(5)  |
| K(1)-O(90)    | 2.897(6)  |
| K(1)-O(60)    | 2.915(5)  |
| K(1)-O(80)    | 2.920(5)  |
| K(1)-O(10)    | 2.926(6)  |
| K(1)-O(30)    | 2.981(6)  |
| K(1)-O(50)    | 2.986(5)  |
| K(1)-O(20)    | 3.025(6)  |
| K(1)-O(100)   | 3.082(6)  |
| K(1)-C(130)   | 3.531(7)  |
| O(10)-C(10)   | 1.416(11) |
| O(10)-C(120)  | 1.431(10) |
| O(20)-C(30)   | 1.408(10) |
| O(20)-C(20)   | 1.410(11) |
| O(30)-C(50)   | 1.385(10) |
| O(30)-C(40)   | 1.413(10) |
| O(40)-C(70)   | 1.401(10) |
| O(40)-C(60)   | 1.440(9)  |
| O(50)-C(90)   | 1.377(10) |

|               |           |
|---------------|-----------|
| O(50)-C(80)   | 1.427(10) |
| O(60)-C(100)  | 1.397(9)  |
| O(60)-C(110)  | 1.435(11) |
| O(70)-C(200)  | 1.389(9)  |
| O(70)-C(130)  | 1.426(8)  |
| O(80)-C(140)  | 1.422(9)  |
| O(80)-C(150)  | 1.423(10) |
| O(90)-C(160)  | 1.405(10) |
| O(90)-C(170)  | 1.413(11) |
| O(100)-C(190) | 1.415(10) |
| O(100)-C(180) | 1.431(11) |
| C(10)-C(20)   | 1.427(14) |
| C(10)-H(10A)  | 0.9900    |
| C(10)-H(10B)  | 0.9900    |
| C(20)-H(20A)  | 0.9900    |
| C(20)-H(20B)  | 0.9900    |
| C(30)-C(40)   | 1.460(12) |
| C(30)-H(30A)  | 0.9900    |
| C(30)-H(30B)  | 0.9900    |
| C(40)-H(40C)  | 0.9900    |
| C(40)-H(40D)  | 0.9900    |
| C(50)-C(60)   | 1.507(12) |
| C(50)-H(50A)  | 0.9900    |
| C(50)-H(50B)  | 0.9900    |
| C(60)-H(60A)  | 0.9900    |
| C(60)-H(60B)  | 0.9900    |
| C(70)-C(80)   | 1.502(12) |
| C(70)-H(70A)  | 0.9900    |
| C(70)-H(70B)  | 0.9900    |
| C(80)-H(80A)  | 0.9900    |
| C(80)-H(80B)  | 0.9900    |
| C(90)-C(100)  | 1.485(13) |
| C(90)-H(90A)  | 0.9900    |
| C(90)-H(90B)  | 0.9900    |
| C(100)-H(10C) | 0.9900    |
| C(100)-H(10D) | 0.9900    |

|               |           |
|---------------|-----------|
| C(110)-C(120) | 1.457(14) |
| C(110)-H(11P) | 0.9900    |
| C(110)-H(11Q) | 0.9900    |
| C(120)-H(12M) | 0.9900    |
| C(120)-H(12N) | 0.9900    |
| C(130)-C(140) | 1.502(11) |
| C(130)-H(13A) | 0.9900    |
| C(130)-H(13B) | 0.9900    |
| C(140)-H(14D) | 0.9900    |
| C(140)-H(14E) | 0.9900    |
| C(150)-C(160) | 1.501(14) |
| C(150)-H(15A) | 0.9900    |
| C(150)-H(15B) | 0.9900    |
| C(160)-H(16A) | 0.9900    |
| C(160)-H(16B) | 0.9900    |
| C(170)-C(180) | 1.521(14) |
| C(170)-H(17A) | 0.9900    |
| C(170)-H(17B) | 0.9900    |
| C(180)-H(18A) | 0.9900    |
| C(180)-H(18B) | 0.9900    |
| C(190)-C(200) | 1.519(11) |
| C(190)-H(19A) | 0.9900    |
| C(190)-H(19B) | 0.9900    |
| C(200)-H(20C) | 0.9900    |
| C(200)-H(20D) | 0.9900    |
| K(2)-O(160)   | 2.854(5)  |
| K(2)-O(160)#1 | 2.854(5)  |
| K(2)-O(120)#1 | 2.904(5)  |
| K(2)-O(120)   | 2.904(5)  |
| K(2)-O(150)   | 2.974(7)  |
| K(2)-O(140)   | 2.981(6)  |
| K(2)-O(110)   | 2.986(7)  |
| K(2)-O(130)#1 | 2.996(5)  |
| K(2)-O(130)   | 2.996(5)  |
| K(2)-O(170)   | 3.001(7)  |
| O(110)-C(210) | 1.419(9)  |



|                 |           |
|-----------------|-----------|
| O(110)-C(210)#1 | 1.419(9)  |
| O(120)-C(220)   | 1.402(10) |
| O(120)-C(230)   | 1.426(9)  |
| O(130)-C(250)   | 1.392(9)  |
| O(130)-C(240)   | 1.437(9)  |
| O(140)-C(260)   | 1.439(8)  |
| O(140)-C(260)#1 | 1.439(8)  |
| O(150)-C(8Y)#1  | 1.481(13) |
| O(150)-C(8Y)    | 1.481(13) |
| O(150)-C(8X)#1  | 1.482(13) |
| O(150)-C(8X)    | 1.482(13) |
| O(160)-C(7Y)    | 1.420(11) |
| O(160)-C(6X)    | 1.427(11) |
| O(160)-C(7X)    | 1.495(11) |
| O(160)-C(6Y)    | 1.496(11) |
| C(210)-C(220)   | 1.473(13) |
| C(210)-H(21A)   | 0.9900    |
| C(210)-H(21B)   | 0.9900    |
| C(220)-H(22A)   | 0.9900    |
| C(220)-H(22B)   | 0.9900    |
| C(230)-C(240)   | 1.490(12) |
| C(230)-H(23A)   | 0.9900    |
| C(230)-H(23B)   | 0.9900    |
| C(240)-H(24A)   | 0.9900    |
| C(240)-H(24B)   | 0.9900    |
| C(250)-C(260)   | 1.492(11) |
| C(250)-H(25A)   | 0.9900    |
| C(250)-H(25B)   | 0.9900    |
| C(260)-H(26A)   | 0.9900    |
| C(260)-H(26B)   | 0.9900    |
| C(8X)-C(7X)     | 1.316(15) |
| C(8X)-H(8XA)    | 0.9900    |
| C(8X)-H(8XB)    | 0.9900    |
| C(7Y)-C(8Y)     | 1.376(15) |
| C(7Y)-H(7YA)    | 0.9900    |
| C(7Y)-H(7YB)    | 0.9900    |

|                 |           |
|-----------------|-----------|
| C(6X)-C(5X)     | 1.378(16) |
| C(6X)-H(6XA)    | 0.9900    |
| C(6X)-H(6XB)    | 0.9900    |
| C(5Y)-C(6Y)     | 1.336(15) |
| C(5Y)-O(170)    | 1.466(12) |
| C(5Y)-H(5YA)    | 0.9900    |
| C(5Y)-H(5YB)    | 0.9900    |
| O(170)-C(5Y)#1  | 1.466(12) |
| O(170)-C(5X)    | 1.477(12) |
| O(170)-C(5X)#1  | 1.477(13) |
| K(3)-O(230)#1   | 2.883(6)  |
| K(3)-O(230)     | 2.883(6)  |
| K(3)-O(190)     | 2.884(7)  |
| K(3)-O(190)#1   | 2.884(7)  |
| K(3)-O(180)     | 2.896(8)  |
| K(3)-O(200)#1   | 2.919(9)  |
| K(3)-O(200)     | 2.919(9)  |
| K(3)-O(220)     | 2.956(6)  |
| K(3)-O(220)#1   | 2.956(6)  |
| K(3)-O(210)     | 3.003(13) |
| O(180)-C(310)#1 | 1.371(10) |
| O(180)-C(310)   | 1.371(10) |
| O(190)-C(330)   | 1.348(10) |
| O(190)-C(320)   | 1.357(14) |
| O(200)-C(340)   | 1.262(10) |
| O(200)-C(350)   | 1.414(11) |
| O(220)-C(370)   | 1.361(12) |
| O(220)-C(380)   | 1.364(12) |
| O(230)-C(400)   | 1.356(12) |
| O(230)-C(390)   | 1.369(11) |
| C(310)-C(320)   | 1.352(13) |
| C(310)-H(31A)   | 0.9900    |
| C(310)-H(31B)   | 0.9900    |
| C(320)-H(32A)   | 0.9900    |
| C(320)-H(32B)   | 0.9900    |
| C(330)-C(340)   | 1.356(13) |

|                 |           |
|-----------------|-----------|
| C(330)-H(33A)   | 0.9900    |
| C(330)-H(33B)   | 0.9900    |
| C(360)-O(210)   | 1.326(13) |
| C(360)-C(350)   | 1.377(17) |
| C(360)-H(36A)   | 0.9900    |
| C(360)-H(36B)   | 0.9900    |
| C(370)-C(370)#1 | 1.28(2)   |
| C(370)-H(37A)   | 0.9900    |
| C(370)-H(37B)   | 0.9900    |
| C(380)-C(390)   | 1.340(14) |
| C(380)-H(38A)   | 0.9900    |
| C(380)-H(38B)   | 0.9900    |
| C(390)-H(39A)   | 0.9900    |
| C(390)-H(39B)   | 0.9900    |
| O(1X)-C(2X)     | 1.375(11) |
| O(1X)-C(3X)     | 1.439(12) |
| C(3X)-C(4X)     | 1.444(13) |
| C(3X)-H(3XA)    | 0.9900    |
| C(3X)-H(3XB)    | 0.9900    |
| C(4X)-H(4XA)    | 0.9800    |
| C(4X)-H(4XB)    | 0.9800    |
| C(4X)-H(4XC)    | 0.9800    |
| C(1X)-C(2X)     | 1.500(15) |
| C(1X)-H(1XA)    | 0.9800    |
| C(1X)-H(1XB)    | 0.9800    |
| C(1X)-H(1XC)    | 0.9800    |
| C(2X)-H(2XA)    | 0.9900    |
| C(2X)-H(2XB)    | 0.9900    |
| C(400)-C(400)#1 | 1.32(2)   |
| C(400)-H(40A)   | 0.9900    |
| C(400)-H(40B)   | 0.9900    |
| O(210)-C(360)#1 | 1.326(13) |
| C(340)-H(34A)   | 0.9900    |
| C(340)-H(34B)   | 0.9900    |
| C(350)-H(35A)   | 0.9900    |
| C(350)-H(35B)   | 0.9900    |

|              |        |
|--------------|--------|
| C(5X)-H(5XA) | 0.9900 |
| C(5X)-H(5XB) | 0.9900 |
| C(6Y)-H(6YA) | 0.9900 |
| C(6Y)-H(6YB) | 0.9900 |
| C(7X)-H(7XA) | 0.9900 |
| C(7X)-H(7XB) | 0.9900 |
| C(8Y)-H(8YA) | 0.9900 |
| C(8Y)-H(8YB) | 0.9900 |

|                     |          |
|---------------------|----------|
| N(21)-Fe(1)-N(11)   | 97.0(2)  |
| N(21)-Fe(1)-C(1)    | 131.5(3) |
| N(11)-Fe(1)-C(1)    | 131.5(3) |
| Fe(1)-C(1)-H(1A)    | 109.5    |
| Fe(1)-C(1)-H(1B)    | 109.5    |
| H(1A)-C(1)-H(1B)    | 109.5    |
| Fe(1)-C(1)-H(1C)    | 109.5    |
| H(1A)-C(1)-H(1C)    | 109.5    |
| H(1B)-C(1)-H(1C)    | 109.5    |
| C(21)-N(11)-C(12)   | 119.6(5) |
| C(21)-N(11)-Fe(1)   | 123.1(4) |
| C(12)-N(11)-Fe(1)   | 116.6(4) |
| C(41)-N(21)-C(13)   | 118.6(5) |
| C(41)-N(21)-Fe(1)   | 123.8(4) |
| C(13)-N(21)-Fe(1)   | 117.5(4) |
| C(21)-C(11)-H(11G)  | 109.5    |
| C(21)-C(11)-H(11H)  | 109.5    |
| H(11G)-C(11)-H(11H) | 109.5    |
| C(21)-C(11)-H(11I)  | 109.5    |
| H(11G)-C(11)-H(11I) | 109.5    |
| H(11H)-C(11)-H(11I) | 109.5    |
| N(11)-C(21)-C(31)   | 122.4(5) |
| N(11)-C(21)-C(11)   | 118.6(5) |
| C(31)-C(21)-C(11)   | 119.0(5) |
| C(21)-C(31)-C(41)   | 130.8(5) |
| C(21)-C(31)-H(31)   | 114.6    |
| C(41)-C(31)-H(31)   | 114.6    |

|                     |          |
|---------------------|----------|
| N(21)-C(41)-C(31)   | 122.2(5) |
| N(21)-C(41)-C(51)   | 120.1(5) |
| C(31)-C(41)-C(51)   | 117.6(5) |
| C(41)-C(51)-H(51A)  | 109.5    |
| C(41)-C(51)-H(51B)  | 109.5    |
| H(51A)-C(51)-H(51B) | 109.5    |
| C(41)-C(51)-H(51C)  | 109.5    |
| H(51A)-C(51)-H(51C) | 109.5    |
| H(51B)-C(51)-H(51C) | 109.5    |
| C(62)-C(12)-N(11)   | 121.5(5) |
| C(62)-C(12)-C(22)   | 119.2(5) |
| N(11)-C(12)-C(22)   | 119.0(6) |
| C(32)-C(22)-C(12)   | 118.6(6) |
| C(32)-C(22)-C(72)   | 121.1(5) |
| C(12)-C(22)-C(72)   | 120.3(5) |
| C(42)-C(32)-C(22)   | 122.0(6) |
| C(42)-C(32)-H(32)   | 119.0    |
| C(22)-C(32)-H(32)   | 119.0    |
| C(32)-C(42)-C(52)   | 119.3(6) |
| C(32)-C(42)-H(42)   | 120.4    |
| C(52)-C(42)-H(42)   | 120.4    |
| C(62)-C(52)-C(42)   | 121.1(6) |
| C(62)-C(52)-H(52)   | 119.4    |
| C(42)-C(52)-H(52)   | 119.4    |
| C(52)-C(62)-C(12)   | 119.7(6) |
| C(52)-C(62)-C(102)  | 118.8(6) |
| C(12)-C(62)-C(102)  | 121.5(5) |
| C(92)-C(72)-C(22)   | 113.8(6) |
| C(92)-C(72)-C(82)   | 110.2(6) |
| C(22)-C(72)-C(82)   | 109.3(6) |
| C(92)-C(72)-H(72)   | 107.7    |
| C(22)-C(72)-H(72)   | 107.7    |
| C(82)-C(72)-H(72)   | 107.7    |
| C(72)-C(82)-H(82A)  | 109.5    |
| C(72)-C(82)-H(82B)  | 109.5    |
| H(82A)-C(82)-H(82B) | 109.5    |

|                      |          |
|----------------------|----------|
| C(72)-C(82)-H(82C)   | 109.5    |
| H(82A)-C(82)-H(82C)  | 109.5    |
| H(82B)-C(82)-H(82C)  | 109.5    |
| C(72)-C(92)-H(92A)   | 109.5    |
| C(72)-C(92)-H(92B)   | 109.5    |
| H(92A)-C(92)-H(92B)  | 109.5    |
| C(72)-C(92)-H(92C)   | 109.5    |
| H(92A)-C(92)-H(92C)  | 109.5    |
| H(92B)-C(92)-H(92C)  | 109.5    |
| C(62)-C(102)-C(112)  | 111.1(6) |
| C(62)-C(102)-C(122)  | 112.2(6) |
| C(112)-C(102)-C(122) | 109.9(6) |
| C(62)-C(102)-H(102)  | 107.8    |
| C(112)-C(102)-H(102) | 107.8    |
| C(122)-C(102)-H(102) | 107.8    |
| C(102)-C(112)-H(11J) | 109.5    |
| C(102)-C(112)-H(11K) | 109.5    |
| H(11J)-C(112)-H(11K) | 109.5    |
| C(102)-C(112)-H(11L) | 109.5    |
| H(11J)-C(112)-H(11L) | 109.5    |
| H(11K)-C(112)-H(11L) | 109.5    |
| C(102)-C(122)-H(12G) | 109.5    |
| C(102)-C(122)-H(12H) | 109.5    |
| H(12G)-C(122)-H(12H) | 109.5    |
| C(102)-C(122)-H(12I) | 109.5    |
| H(12G)-C(122)-H(12I) | 109.5    |
| H(12H)-C(122)-H(12I) | 109.5    |
| C(63)-C(13)-C(23)    | 120.5(5) |
| C(63)-C(13)-N(21)    | 120.0(5) |
| C(23)-C(13)-N(21)    | 119.4(5) |
| C(33)-C(23)-C(13)    | 117.2(5) |
| C(33)-C(23)-C(73)    | 121.5(6) |
| C(13)-C(23)-C(73)    | 121.3(6) |
| C(43)-C(33)-C(23)    | 122.7(7) |
| C(43)-C(33)-H(33)    | 118.7    |
| C(23)-C(33)-H(33)    | 118.7    |

|                      |          |
|----------------------|----------|
| C(33)-C(43)-C(53)    | 120.1(6) |
| C(33)-C(43)-H(43)    | 119.9    |
| C(53)-C(43)-H(43)    | 119.9    |
| C(43)-C(53)-C(63)    | 121.2(6) |
| C(43)-C(53)-H(53)    | 119.4    |
| C(63)-C(53)-H(53)    | 119.4    |
| C(53)-C(63)-C(13)    | 118.3(6) |
| C(53)-C(63)-C(103)   | 120.7(5) |
| C(13)-C(63)-C(103)   | 121.0(5) |
| C(93)-C(73)-C(23)    | 112.5(6) |
| C(93)-C(73)-C(83)    | 111.9(6) |
| C(23)-C(73)-C(83)    | 111.3(5) |
| C(93)-C(73)-H(73)    | 106.9    |
| C(23)-C(73)-H(73)    | 106.9    |
| C(83)-C(73)-H(73)    | 106.9    |
| C(73)-C(83)-H(83A)   | 109.5    |
| C(73)-C(83)-H(83B)   | 109.5    |
| H(83A)-C(83)-H(83B)  | 109.5    |
| C(73)-C(83)-H(83C)   | 109.5    |
| H(83A)-C(83)-H(83C)  | 109.5    |
| H(83B)-C(83)-H(83C)  | 109.5    |
| C(73)-C(93)-H(93A)   | 109.5    |
| C(73)-C(93)-H(93B)   | 109.5    |
| H(93A)-C(93)-H(93B)  | 109.5    |
| C(73)-C(93)-H(93C)   | 109.5    |
| H(93A)-C(93)-H(93C)  | 109.5    |
| H(93B)-C(93)-H(93C)  | 109.5    |
| C(63)-C(103)-C(113)  | 110.4(5) |
| C(63)-C(103)-C(123)  | 112.7(6) |
| C(113)-C(103)-C(123) | 110.8(6) |
| C(63)-C(103)-H(103)  | 107.6    |
| C(113)-C(103)-H(103) | 107.6    |
| C(123)-C(103)-H(103) | 107.6    |
| C(103)-C(113)-H(11M) | 109.5    |
| C(103)-C(113)-H(11N) | 109.5    |
| H(11M)-C(113)-H(11N) | 109.5    |

|                      |          |
|----------------------|----------|
| C(103)-C(113)-H(11O) | 109.5    |
| H(11M)-C(113)-H(11O) | 109.5    |
| H(11N)-C(113)-H(11O) | 109.5    |
| C(103)-C(123)-H(12J) | 109.5    |
| C(103)-C(123)-H(12K) | 109.5    |
| H(12J)-C(123)-H(12K) | 109.5    |
| C(103)-C(123)-H(12L) | 109.5    |
| H(12J)-C(123)-H(12L) | 109.5    |
| H(12K)-C(123)-H(12L) | 109.5    |
| N(14)-Fe(2)-N(24)    | 97.5(2)  |
| N(14)-Fe(2)-C(2)     | 132.7(4) |
| N(24)-Fe(2)-C(2)     | 129.6(3) |
| Fe(2)-C(2)-H(0AA)    | 109.5    |
| Fe(2)-C(2)-H(0AB)    | 109.5    |
| H(0AA)-C(2)-H(0AB)   | 109.5    |
| Fe(2)-C(2)-H(0AC)    | 109.5    |
| H(0AA)-C(2)-H(0AC)   | 109.5    |
| H(0AB)-C(2)-H(0AC)   | 109.5    |
| C(24)-N(14)-C(15)    | 118.3(5) |
| C(24)-N(14)-Fe(2)    | 123.3(4) |
| C(15)-N(14)-Fe(2)    | 118.4(4) |
| C(44)-N(24)-C(16)    | 118.6(5) |
| C(44)-N(24)-Fe(2)    | 123.4(4) |
| C(16)-N(24)-Fe(2)    | 118.0(4) |
| C(24)-C(14)-H(14A)   | 109.5    |
| C(24)-C(14)-H(14B)   | 109.5    |
| H(14A)-C(14)-H(14B)  | 109.5    |
| C(24)-C(14)-H(14C)   | 109.5    |
| H(14A)-C(14)-H(14C)  | 109.5    |
| H(14B)-C(14)-H(14C)  | 109.5    |
| N(14)-C(24)-C(34)    | 123.1(5) |
| N(14)-C(24)-C(14)    | 119.5(6) |
| C(34)-C(24)-C(14)    | 117.4(6) |
| C(24)-C(34)-C(44)    | 130.9(6) |
| C(24)-C(34)-H(34)    | 114.5    |
| C(44)-C(34)-H(34)    | 114.5    |



|                     |          |
|---------------------|----------|
| N(24)-C(44)-C(34)   | 121.8(6) |
| N(24)-C(44)-C(54)   | 118.0(6) |
| C(34)-C(44)-C(54)   | 120.2(6) |
| C(44)-C(54)-H(54A)  | 109.5    |
| C(44)-C(54)-H(54B)  | 109.5    |
| H(54A)-C(54)-H(54B) | 109.5    |
| C(44)-C(54)-H(54C)  | 109.5    |
| H(54A)-C(54)-H(54C) | 109.5    |
| H(54B)-C(54)-H(54C) | 109.5    |
| C(65)-C(15)-N(14)   | 121.5(6) |
| C(65)-C(15)-C(25)   | 119.1(6) |
| N(14)-C(15)-C(25)   | 119.3(6) |
| C(35)-C(25)-C(15)   | 117.6(6) |
| C(35)-C(25)-C(75)   | 121.3(5) |
| C(15)-C(25)-C(75)   | 120.9(6) |
| C(45)-C(35)-C(25)   | 123.9(6) |
| C(45)-C(35)-H(35)   | 118.1    |
| C(25)-C(35)-H(35)   | 118.1    |
| C(35)-C(45)-C(55)   | 117.9(7) |
| C(35)-C(45)-H(45)   | 121.0    |
| C(55)-C(45)-H(45)   | 121.0    |
| C(65)-C(55)-C(45)   | 120.7(7) |
| C(65)-C(55)-H(55)   | 119.6    |
| C(45)-C(55)-H(55)   | 119.6    |
| C(55)-C(65)-C(15)   | 120.4(6) |
| C(55)-C(65)-C(105)  | 120.0(7) |
| C(15)-C(65)-C(105)  | 119.6(7) |
| C(25)-C(75)-C(95)   | 114.7(6) |
| C(25)-C(75)-C(85)   | 109.1(6) |
| C(95)-C(75)-C(85)   | 112.0(6) |
| C(25)-C(75)-H(75)   | 106.9    |
| C(95)-C(75)-H(75)   | 106.9    |
| C(85)-C(75)-H(75)   | 106.9    |
| C(75)-C(85)-H(85A)  | 109.5    |
| C(75)-C(85)-H(85B)  | 109.5    |
| H(85A)-C(85)-H(85B) | 109.5    |

|                      |          |
|----------------------|----------|
| C(75)-C(85)-H(85C)   | 109.5    |
| H(85A)-C(85)-H(85C)  | 109.5    |
| H(85B)-C(85)-H(85C)  | 109.5    |
| C(75)-C(95)-H(95A)   | 109.5    |
| C(75)-C(95)-H(95B)   | 109.5    |
| H(95A)-C(95)-H(95B)  | 109.5    |
| C(75)-C(95)-H(95C)   | 109.5    |
| H(95A)-C(95)-H(95C)  | 109.5    |
| H(95B)-C(95)-H(95C)  | 109.5    |
| C(65)-C(105)-C(125)  | 110.0(7) |
| C(65)-C(105)-C(115)  | 112.3(7) |
| C(125)-C(105)-C(115) | 108.7(7) |
| C(65)-C(105)-H(105)  | 108.6    |
| C(125)-C(105)-H(105) | 108.6    |
| C(115)-C(105)-H(105) | 108.6    |
| C(105)-C(115)-H(11A) | 109.5    |
| C(105)-C(115)-H(11B) | 109.5    |
| H(11A)-C(115)-H(11B) | 109.5    |
| C(105)-C(115)-H(11C) | 109.5    |
| H(11A)-C(115)-H(11C) | 109.5    |
| H(11B)-C(115)-H(11C) | 109.5    |
| C(105)-C(125)-H(12A) | 109.5    |
| C(105)-C(125)-H(12B) | 109.5    |
| H(12A)-C(125)-H(12B) | 109.5    |
| C(105)-C(125)-H(12C) | 109.5    |
| H(12A)-C(125)-H(12C) | 109.5    |
| H(12B)-C(125)-H(12C) | 109.5    |
| C(26)-C(16)-N(24)    | 121.2(6) |
| C(26)-C(16)-C(66)    | 119.1(6) |
| N(24)-C(16)-C(66)    | 119.7(5) |
| C(36)-C(26)-C(16)    | 119.5(7) |
| C(36)-C(26)-C(76)    | 121.7(7) |
| C(16)-C(26)-C(76)    | 118.7(7) |
| C(26)-C(36)-C(46)    | 122.4(7) |
| C(26)-C(36)-H(36)    | 118.8    |
| C(46)-C(36)-H(36)    | 118.8    |

|                      |           |
|----------------------|-----------|
| C(36)-C(46)-C(56)    | 118.9(7)  |
| C(36)-C(46)-H(46)    | 120.6     |
| C(56)-C(46)-H(46)    | 120.6     |
| C(66)-C(56)-C(46)    | 120.7(7)  |
| C(66)-C(56)-H(56)    | 119.7     |
| C(46)-C(56)-H(56)    | 119.7     |
| C(56)-C(66)-C(16)    | 119.3(6)  |
| C(56)-C(66)-C(106)   | 120.9(6)  |
| C(16)-C(66)-C(106)   | 119.7(5)  |
| C(26)-C(76)-C(86)    | 111.1(9)  |
| C(26)-C(76)-C(96)    | 112.3(8)  |
| C(86)-C(76)-C(96)    | 111.1(10) |
| C(26)-C(76)-H(76)    | 107.4     |
| C(86)-C(76)-H(76)    | 107.4     |
| C(96)-C(76)-H(76)    | 107.4     |
| C(76)-C(86)-H(86A)   | 109.5     |
| C(76)-C(86)-H(86B)   | 109.5     |
| H(86A)-C(86)-H(86B)  | 109.5     |
| C(76)-C(86)-H(86C)   | 109.5     |
| H(86A)-C(86)-H(86C)  | 109.5     |
| H(86B)-C(86)-H(86C)  | 109.5     |
| C(76)-C(96)-H(96A)   | 109.5     |
| C(76)-C(96)-H(96B)   | 109.5     |
| H(96A)-C(96)-H(96B)  | 109.5     |
| C(76)-C(96)-H(96C)   | 109.5     |
| H(96A)-C(96)-H(96C)  | 109.5     |
| H(96B)-C(96)-H(96C)  | 109.5     |
| C(66)-C(106)-C(116)  | 111.4(5)  |
| C(66)-C(106)-C(126)  | 114.3(6)  |
| C(116)-C(106)-C(126) | 108.4(6)  |
| C(66)-C(106)-H(106)  | 107.5     |
| C(116)-C(106)-H(106) | 107.5     |
| C(126)-C(106)-H(106) | 107.5     |
| C(106)-C(116)-H(11D) | 109.5     |
| C(106)-C(116)-H(11E) | 109.5     |
| H(11D)-C(116)-H(11E) | 109.5     |

|                      |            |
|----------------------|------------|
| C(106)-C(116)-H(11F) | 109.5      |
| H(11D)-C(116)-H(11F) | 109.5      |
| H(11E)-C(116)-H(11F) | 109.5      |
| C(106)-C(126)-H(12D) | 109.5      |
| C(106)-C(126)-H(12E) | 109.5      |
| H(12D)-C(126)-H(12E) | 109.5      |
| C(106)-C(126)-H(12F) | 109.5      |
| H(12D)-C(126)-H(12F) | 109.5      |
| H(12E)-C(126)-H(12F) | 109.5      |
| O(70)-K(1)-O(40)     | 138.17(17) |
| O(70)-K(1)-O(90)     | 82.38(15)  |
| O(40)-K(1)-O(90)     | 66.44(16)  |
| O(70)-K(1)-O(60)     | 66.07(15)  |
| O(40)-K(1)-O(60)     | 113.40(17) |
| O(90)-K(1)-O(60)     | 129.82(19) |
| O(70)-K(1)-O(80)     | 58.80(14)  |
| O(40)-K(1)-O(80)     | 118.19(17) |
| O(90)-K(1)-O(80)     | 58.52(17)  |
| O(60)-K(1)-O(80)     | 122.33(16) |
| O(70)-K(1)-O(10)     | 69.53(16)  |
| O(40)-K(1)-O(10)     | 149.16(18) |
| O(90)-K(1)-O(10)     | 143.17(16) |
| O(60)-K(1)-O(10)     | 59.05(18)  |
| O(80)-K(1)-O(10)     | 86.09(17)  |
| O(70)-K(1)-O(30)     | 139.75(16) |
| O(40)-K(1)-O(30)     | 58.97(16)  |
| O(90)-K(1)-O(30)     | 75.14(17)  |
| O(60)-K(1)-O(30)     | 151.29(18) |
| O(80)-K(1)-O(30)     | 80.97(16)  |
| O(10)-K(1)-O(30)     | 111.66(18) |
| O(70)-K(1)-O(50)     | 116.03(15) |
| O(40)-K(1)-O(50)     | 57.66(16)  |
| O(90)-K(1)-O(50)     | 111.94(17) |
| O(60)-K(1)-O(50)     | 57.42(16)  |
| O(80)-K(1)-O(50)     | 168.59(17) |
| O(10)-K(1)-O(50)     | 101.81(16) |

|                    |            |
|--------------------|------------|
| O(30)-K(1)-O(50)   | 103.31(15) |
| O(70)-K(1)-O(20)   | 108.47(15) |
| O(40)-K(1)-O(20)   | 109.88(16) |
| O(90)-K(1)-O(20)   | 115.63(17) |
| O(60)-K(1)-O(20)   | 111.06(18) |
| O(80)-K(1)-O(20)   | 73.79(16)  |
| O(10)-K(1)-O(20)   | 56.11(16)  |
| O(30)-K(1)-O(20)   | 55.81(16)  |
| O(50)-K(1)-O(20)   | 117.43(15) |
| O(70)-K(1)-O(100)  | 56.34(15)  |
| O(40)-K(1)-O(100)  | 82.86(17)  |
| O(90)-K(1)-O(100)  | 57.34(17)  |
| O(60)-K(1)-O(100)  | 72.61(18)  |
| O(80)-K(1)-O(100)  | 89.67(16)  |
| O(10)-K(1)-O(100)  | 118.16(17) |
| O(30)-K(1)-O(100)  | 128.42(18) |
| O(50)-K(1)-O(100)  | 79.38(15)  |
| O(20)-K(1)-O(100)  | 162.44(15) |
| O(70)-K(1)-C(130)  | 22.47(16)  |
| O(40)-K(1)-C(130)  | 149.9(2)   |
| O(90)-K(1)-C(130)  | 83.99(18)  |
| O(60)-K(1)-C(130)  | 80.61(17)  |
| O(80)-K(1)-C(130)  | 41.72(17)  |
| O(10)-K(1)-C(130)  | 60.97(18)  |
| O(30)-K(1)-C(130)  | 120.47(17) |
| O(50)-K(1)-C(130)  | 136.11(17) |
| O(20)-K(1)-C(130)  | 87.49(17)  |
| O(100)-K(1)-C(130) | 76.03(17)  |
| C(10)-O(10)-C(120) | 112.9(7)   |
| C(10)-O(10)-K(1)   | 120.6(5)   |
| C(120)-O(10)-K(1)  | 115.8(5)   |
| C(30)-O(20)-C(20)  | 115.5(7)   |
| C(30)-O(20)-K(1)   | 110.4(5)   |
| C(20)-O(20)-K(1)   | 107.6(5)   |
| C(50)-O(30)-C(40)  | 113.1(6)   |
| C(50)-O(30)-K(1)   | 115.7(5)   |

|                      |          |
|----------------------|----------|
| C(40)-O(30)-K(1)     | 119.5(5) |
| C(70)-O(40)-C(60)    | 113.2(6) |
| C(70)-O(40)-K(1)     | 117.9(5) |
| C(60)-O(40)-K(1)     | 113.2(4) |
| C(90)-O(50)-C(80)    | 113.1(7) |
| C(90)-O(50)-K(1)     | 112.5(5) |
| C(80)-O(50)-K(1)     | 111.9(4) |
| C(100)-O(60)-C(110)  | 115.2(7) |
| C(100)-O(60)-K(1)    | 116.4(4) |
| C(110)-O(60)-K(1)    | 112.7(5) |
| C(200)-O(70)-C(130)  | 113.3(6) |
| C(200)-O(70)-K(1)    | 128.2(4) |
| C(130)-O(70)-K(1)    | 108.9(4) |
| C(140)-O(80)-C(150)  | 113.7(7) |
| C(140)-O(80)-K(1)    | 117.8(4) |
| C(150)-O(80)-K(1)    | 110.2(5) |
| C(160)-O(90)-C(170)  | 116.0(7) |
| C(160)-O(90)-K(1)    | 120.2(5) |
| C(170)-O(90)-K(1)    | 111.1(5) |
| C(190)-O(100)-C(180) | 113.1(7) |
| C(190)-O(100)-K(1)   | 108.6(5) |
| C(180)-O(100)-K(1)   | 116.4(5) |
| O(10)-C(10)-C(20)    | 108.8(8) |
| O(10)-C(10)-H(10A)   | 109.9    |
| C(20)-C(10)-H(10A)   | 109.9    |
| O(10)-C(10)-H(10B)   | 109.9    |
| C(20)-C(10)-H(10B)   | 109.9    |
| H(10A)-C(10)-H(10B)  | 108.3    |
| O(20)-C(20)-C(10)    | 111.7(8) |
| O(20)-C(20)-H(20A)   | 109.3    |
| C(10)-C(20)-H(20A)   | 109.3    |
| O(20)-C(20)-H(20B)   | 109.3    |
| C(10)-C(20)-H(20B)   | 109.3    |
| H(20A)-C(20)-H(20B)  | 107.9    |
| O(20)-C(30)-C(40)    | 110.2(7) |
| O(20)-C(30)-H(30A)   | 109.6    |

|                     |          |
|---------------------|----------|
| C(40)-C(30)-H(30A)  | 109.6    |
| O(20)-C(30)-H(30B)  | 109.6    |
| C(40)-C(30)-H(30B)  | 109.6    |
| H(30A)-C(30)-H(30B) | 108.1    |
| O(30)-C(40)-C(30)   | 110.5(7) |
| O(30)-C(40)-H(40C)  | 109.5    |
| C(30)-C(40)-H(40C)  | 109.5    |
| O(30)-C(40)-H(40D)  | 109.5    |
| C(30)-C(40)-H(40D)  | 109.5    |
| H(40C)-C(40)-H(40D) | 108.1    |
| O(30)-C(50)-C(60)   | 109.9(7) |
| O(30)-C(50)-H(50A)  | 109.7    |
| C(60)-C(50)-H(50A)  | 109.7    |
| O(30)-C(50)-H(50B)  | 109.7    |
| C(60)-C(50)-H(50B)  | 109.7    |
| H(50A)-C(50)-H(50B) | 108.2    |
| O(40)-C(60)-C(50)   | 112.2(7) |
| O(40)-C(60)-H(60A)  | 109.2    |
| C(50)-C(60)-H(60A)  | 109.2    |
| O(40)-C(60)-H(60B)  | 109.2    |
| C(50)-C(60)-H(60B)  | 109.2    |
| H(60A)-C(60)-H(60B) | 107.9    |
| O(40)-C(70)-C(80)   | 106.1(7) |
| O(40)-C(70)-H(70A)  | 110.5    |
| C(80)-C(70)-H(70A)  | 110.5    |
| O(40)-C(70)-H(70B)  | 110.5    |
| C(80)-C(70)-H(70B)  | 110.5    |
| H(70A)-C(70)-H(70B) | 108.7    |
| O(50)-C(80)-C(70)   | 110.2(6) |
| O(50)-C(80)-H(80A)  | 109.6    |
| C(70)-C(80)-H(80A)  | 109.6    |
| O(50)-C(80)-H(80B)  | 109.6    |
| C(70)-C(80)-H(80B)  | 109.6    |
| H(80A)-C(80)-H(80B) | 108.1    |
| O(50)-C(90)-C(100)  | 110.4(8) |
| O(50)-C(90)-H(90A)  | 109.6    |

|                      |          |
|----------------------|----------|
| C(100)-C(90)-H(90A)  | 109.6    |
| O(50)-C(90)-H(90B)   | 109.6    |
| C(100)-C(90)-H(90B)  | 109.6    |
| H(90A)-C(90)-H(90B)  | 108.1    |
| O(60)-C(100)-C(90)   | 109.7(7) |
| O(60)-C(100)-H(10C)  | 109.7    |
| C(90)-C(100)-H(10C)  | 109.7    |
| O(60)-C(100)-H(10D)  | 109.7    |
| C(90)-C(100)-H(10D)  | 109.7    |
| H(10C)-C(100)-H(10D) | 108.2    |
| O(60)-C(110)-C(120)  | 112.8(8) |
| O(60)-C(110)-H(11P)  | 109.0    |
| C(120)-C(110)-H(11P) | 109.0    |
| O(60)-C(110)-H(11Q)  | 109.0    |
| C(120)-C(110)-H(11Q) | 109.0    |
| H(11P)-C(110)-H(11Q) | 107.8    |
| O(10)-C(120)-C(110)  | 110.8(8) |
| O(10)-C(120)-H(12M)  | 109.5    |
| C(110)-C(120)-H(12M) | 109.5    |
| O(10)-C(120)-H(12N)  | 109.5    |
| C(110)-C(120)-H(12N) | 109.5    |
| H(12M)-C(120)-H(12N) | 108.1    |
| O(70)-C(130)-C(140)  | 111.6(7) |
| O(70)-C(130)-K(1)    | 48.7(3)  |
| C(140)-C(130)-K(1)   | 88.4(4)  |
| O(70)-C(130)-H(13A)  | 109.3    |
| C(140)-C(130)-H(13A) | 109.3    |
| K(1)-C(130)-H(13A)   | 78.5     |
| O(70)-C(130)-H(13B)  | 109.3    |
| C(140)-C(130)-H(13B) | 109.3    |
| K(1)-C(130)-H(13B)   | 156.9    |
| H(13A)-C(130)-H(13B) | 108.0    |
| O(80)-C(140)-C(130)  | 108.1(6) |
| O(80)-C(140)-H(14D)  | 110.1    |
| C(130)-C(140)-H(14D) | 110.1    |
| O(80)-C(140)-H(14E)  | 110.1    |



|                      |          |
|----------------------|----------|
| C(130)-C(140)-H(14E) | 110.1    |
| H(14D)-C(140)-H(14E) | 108.4    |
| O(80)-C(150)-C(160)  | 113.4(7) |
| O(80)-C(150)-H(15A)  | 108.9    |
| C(160)-C(150)-H(15A) | 108.9    |
| O(80)-C(150)-H(15B)  | 108.9    |
| C(160)-C(150)-H(15B) | 108.9    |
| H(15A)-C(150)-H(15B) | 107.7    |
| O(90)-C(160)-C(150)  | 108.6(7) |
| O(90)-C(160)-H(16A)  | 110.0    |
| C(150)-C(160)-H(16A) | 110.0    |
| O(90)-C(160)-H(16B)  | 110.0    |
| C(150)-C(160)-H(16B) | 110.0    |
| H(16A)-C(160)-H(16B) | 108.4    |
| O(90)-C(170)-C(180)  | 112.9(7) |
| O(90)-C(170)-H(17A)  | 109.0    |
| C(180)-C(170)-H(17A) | 109.0    |
| O(90)-C(170)-H(17B)  | 109.0    |
| C(180)-C(170)-H(17B) | 109.0    |
| H(17A)-C(170)-H(17B) | 107.8    |
| O(100)-C(180)-C(170) | 107.8(8) |
| O(100)-C(180)-H(18A) | 110.2    |
| C(170)-C(180)-H(18A) | 110.2    |
| O(100)-C(180)-H(18B) | 110.2    |
| C(170)-C(180)-H(18B) | 110.2    |
| H(18A)-C(180)-H(18B) | 108.5    |
| O(100)-C(190)-C(200) | 113.3(7) |
| O(100)-C(190)-H(19A) | 108.9    |
| C(200)-C(190)-H(19A) | 108.9    |
| O(100)-C(190)-H(19B) | 108.9    |
| C(200)-C(190)-H(19B) | 108.9    |
| H(19A)-C(190)-H(19B) | 107.7    |
| O(70)-C(200)-C(190)  | 107.2(6) |
| O(70)-C(200)-H(20C)  | 110.3    |
| C(190)-C(200)-H(20C) | 110.3    |
| O(70)-C(200)-H(20D)  | 110.3    |

|                        |            |
|------------------------|------------|
| C(190)-C(200)-H(20D)   | 110.3      |
| H(20C)-C(200)-H(20D)   | 108.5      |
| O(160)-K(2)-O(160)#1   | 83.1(2)    |
| O(160)-K(2)-O(120)#1   | 136.91(16) |
| O(160)#1-K(2)-O(120)#1 | 68.06(14)  |
| O(160)-K(2)-O(120)     | 68.07(14)  |
| O(160)#1-K(2)-O(120)   | 136.91(16) |
| O(120)#1-K(2)-O(120)   | 112.6(2)   |
| O(160)-K(2)-O(150)     | 57.82(13)  |
| O(160)#1-K(2)-O(150)   | 57.82(13)  |
| O(120)#1-K(2)-O(150)   | 79.50(13)  |
| O(120)-K(2)-O(150)     | 79.50(13)  |
| O(160)-K(2)-O(140)     | 113.56(14) |
| O(160)#1-K(2)-O(140)   | 113.56(13) |
| O(120)#1-K(2)-O(140)   | 107.24(13) |
| O(120)-K(2)-O(140)     | 107.24(13) |
| O(150)-K(2)-O(140)     | 166.90(19) |
| O(160)-K(2)-O(110)     | 117.38(14) |
| O(160)#1-K(2)-O(110)   | 117.38(14) |
| O(120)#1-K(2)-O(110)   | 57.19(12)  |
| O(120)-K(2)-O(110)     | 57.19(12)  |
| O(150)-K(2)-O(110)     | 83.32(19)  |
| O(140)-K(2)-O(110)     | 109.78(19) |
| O(160)-K(2)-O(130)#1   | 142.95(15) |
| O(160)#1-K(2)-O(130)#1 | 72.48(14)  |
| O(120)#1-K(2)-O(130)#1 | 57.18(14)  |
| O(120)-K(2)-O(130)#1   | 146.71(16) |
| O(150)-K(2)-O(130)#1   | 123.60(10) |
| O(140)-K(2)-O(130)#1   | 56.02(10)  |
| O(110)-K(2)-O(130)#1   | 98.72(13)  |
| O(160)-K(2)-O(130)     | 72.48(14)  |
| O(160)#1-K(2)-O(130)   | 142.95(15) |
| O(120)#1-K(2)-O(130)   | 146.71(16) |
| O(120)-K(2)-O(130)     | 57.18(14)  |
| O(150)-K(2)-O(130)     | 123.60(10) |
| O(140)-K(2)-O(130)     | 56.02(10)  |

|                        |            |
|------------------------|------------|
| O(110)-K(2)-O(130)     | 98.72(13)  |
| O(130)#1-K(2)-O(130)   | 111.8(2)   |
| O(160)-K(2)-O(170)     | 57.36(13)  |
| O(160)#1-K(2)-O(170)   | 57.36(13)  |
| O(120)#1-K(2)-O(170)   | 121.28(12) |
| O(120)-K(2)-O(170)     | 121.28(12) |
| O(150)-K(2)-O(170)     | 88.48(19)  |
| O(140)-K(2)-O(170)     | 78.41(18)  |
| O(110)-K(2)-O(170)     | 171.8(2)   |
| O(130)#1-K(2)-O(170)   | 85.80(13)  |
| O(130)-K(2)-O(170)     | 85.80(13)  |
| C(210)-O(110)-C(210)#1 | 112.6(9)   |
| C(210)-O(110)-K(2)     | 114.5(5)   |
| C(210)#1-O(110)-K(2)   | 114.5(5)   |
| C(220)-O(120)-C(230)   | 114.3(6)   |
| C(220)-O(120)-K(2)     | 116.8(5)   |
| C(230)-O(120)-K(2)     | 114.3(4)   |
| C(250)-O(130)-C(240)   | 111.7(6)   |
| C(250)-O(130)-K(2)     | 118.8(4)   |
| C(240)-O(130)-K(2)     | 118.0(4)   |
| C(260)-O(140)-C(260)#1 | 110.7(7)   |
| C(260)-O(140)-K(2)     | 111.1(4)   |
| C(260)#1-O(140)-K(2)   | 111.1(4)   |
| C(8Y)#1-O(150)-C(8Y)   | 135(3)     |
| C(8X)#1-O(150)-C(8X)   | 108.5(17)  |
| C(8Y)#1-O(150)-K(2)    | 102.9(10)  |
| C(8Y)-O(150)-K(2)      | 102.9(10)  |
| C(8X)#1-O(150)-K(2)    | 120.0(7)   |
| C(8X)-O(150)-K(2)      | 120.0(8)   |
| C(6X)-O(160)-C(7X)     | 108.7(9)   |
| C(7Y)-O(160)-C(6Y)     | 110.4(10)  |
| C(7Y)-O(160)-K(2)      | 129.1(7)   |
| C(6X)-O(160)-K(2)      | 128.5(7)   |
| C(7X)-O(160)-K(2)      | 107.8(7)   |
| C(6Y)-O(160)-K(2)      | 109.5(7)   |
| O(110)-C(210)-C(220)   | 109.6(7)   |

|                      |           |
|----------------------|-----------|
| O(110)-C(210)-H(21A) | 109.7     |
| C(220)-C(210)-H(21A) | 109.7     |
| O(110)-C(210)-H(21B) | 109.7     |
| C(220)-C(210)-H(21B) | 109.7     |
| H(21A)-C(210)-H(21B) | 108.2     |
| O(120)-C(220)-C(210) | 110.2(7)  |
| O(120)-C(220)-H(22A) | 109.6     |
| C(210)-C(220)-H(22A) | 109.6     |
| O(120)-C(220)-H(22B) | 109.6     |
| C(210)-C(220)-H(22B) | 109.6     |
| H(22A)-C(220)-H(22B) | 108.1     |
| O(120)-C(230)-C(240) | 111.3(6)  |
| O(120)-C(230)-H(23A) | 109.4     |
| C(240)-C(230)-H(23A) | 109.4     |
| O(120)-C(230)-H(23B) | 109.4     |
| C(240)-C(230)-H(23B) | 109.4     |
| H(23A)-C(230)-H(23B) | 108.0     |
| O(130)-C(240)-C(230) | 108.7(6)  |
| O(130)-C(240)-H(24A) | 110.0     |
| C(230)-C(240)-H(24A) | 110.0     |
| O(130)-C(240)-H(24B) | 110.0     |
| C(230)-C(240)-H(24B) | 110.0     |
| H(24A)-C(240)-H(24B) | 108.3     |
| O(130)-C(250)-C(260) | 109.9(6)  |
| O(130)-C(250)-H(25A) | 109.7     |
| C(260)-C(250)-H(25A) | 109.7     |
| O(130)-C(250)-H(25B) | 109.7     |
| C(260)-C(250)-H(25B) | 109.7     |
| H(25A)-C(250)-H(25B) | 108.2     |
| O(140)-C(260)-C(250) | 107.4(6)  |
| O(140)-C(260)-H(26A) | 110.2     |
| C(250)-C(260)-H(26A) | 110.2     |
| O(140)-C(260)-H(26B) | 110.2     |
| C(250)-C(260)-H(26B) | 110.2     |
| H(26A)-C(260)-H(26B) | 108.5     |
| C(7X)-C(8X)-O(150)   | 106.9(15) |

|                        |            |
|------------------------|------------|
| C(7X)-C(8X)-H(8XA)     | 110.3      |
| O(150)-C(8X)-H(8XA)    | 110.3      |
| C(7X)-C(8X)-H(8XB)     | 110.3      |
| O(150)-C(8X)-H(8XB)    | 110.3      |
| H(8XA)-C(8X)-H(8XB)    | 108.6      |
| C(8Y)-C(7Y)-O(160)     | 99.1(14)   |
| C(8Y)-C(7Y)-H(7YA)     | 111.9      |
| O(160)-C(7Y)-H(7YA)    | 111.9      |
| C(8Y)-C(7Y)-H(7YB)     | 111.9      |
| O(160)-C(7Y)-H(7YB)    | 111.9      |
| H(7YA)-C(7Y)-H(7YB)    | 109.6      |
| C(5X)-C(6X)-O(160)     | 97.4(13)   |
| C(5X)-C(6X)-H(6XA)     | 112.3      |
| O(160)-C(6X)-H(6XA)    | 112.3      |
| C(5X)-C(6X)-H(6XB)     | 112.3      |
| O(160)-C(6X)-H(6XB)    | 112.3      |
| H(6XA)-C(6X)-H(6XB)    | 109.9      |
| C(6Y)-C(5Y)-O(170)     | 108.6(14)  |
| C(6Y)-C(5Y)-H(5YA)     | 110.0      |
| O(170)-C(5Y)-H(5YA)    | 110.0      |
| C(6Y)-C(5Y)-H(5YB)     | 110.0      |
| O(170)-C(5Y)-H(5YB)    | 110.0      |
| H(5YA)-C(5Y)-H(5YB)    | 108.3      |
| C(5Y)#1-O(170)-C(5Y)   | 104.5(15)  |
| C(5X)-O(170)-C(5X)#1   | 134(2)     |
| C(5Y)#1-O(170)-K(2)    | 119.5(7)   |
| C(5Y)-O(170)-K(2)      | 119.5(7)   |
| C(5X)-O(170)-K(2)      | 102.3(10)  |
| C(5X)#1-O(170)-K(2)    | 102.3(10)  |
| O(230)#1-K(3)-O(230)   | 58.3(2)    |
| O(230)#1-K(3)-O(190)   | 158.2(3)   |
| O(230)-K(3)-O(190)     | 100.4(3)   |
| O(230)#1-K(3)-O(190)#1 | 100.4(3)   |
| O(230)-K(3)-O(190)#1   | 158.2(3)   |
| O(190)-K(3)-O(190)#1   | 100.2(4)   |
| O(230)#1-K(3)-O(180)   | 129.46(18) |

|                        |            |
|------------------------|------------|
| O(230)-K(3)-O(180)     | 129.46(19) |
| O(190)-K(3)-O(180)     | 58.50(17)  |
| O(190)#1-K(3)-O(180)   | 58.50(17)  |
| O(230)#1-K(3)-O(200)#1 | 69.4(4)    |
| O(230)-K(3)-O(200)#1   | 114.4(3)   |
| O(190)-K(3)-O(200)#1   | 129.4(5)   |
| O(190)#1-K(3)-O(200)#1 | 55.2(2)    |
| O(180)-K(3)-O(200)#1   | 113.4(2)   |
| O(230)#1-K(3)-O(200)   | 114.4(3)   |
| O(230)-K(3)-O(200)     | 69.4(4)    |
| O(190)-K(3)-O(200)     | 55.2(2)    |
| O(190)#1-K(3)-O(200)   | 129.4(5)   |
| O(180)-K(3)-O(200)     | 113.4(2)   |
| O(200)#1-K(3)-O(200)   | 103.5(7)   |
| O(230)#1-K(3)-O(220)   | 86.15(18)  |
| O(230)-K(3)-O(220)     | 57.74(16)  |
| O(190)-K(3)-O(220)     | 77.3(2)    |
| O(190)#1-K(3)-O(220)   | 121.0(2)   |
| O(180)-K(3)-O(220)     | 72.3(2)    |
| O(200)#1-K(3)-O(220)   | 152.6(4)   |
| O(200)-K(3)-O(220)     | 97.7(4)    |
| O(230)#1-K(3)-O(220)#1 | 57.74(16)  |
| O(230)-K(3)-O(220)#1   | 86.15(18)  |
| O(190)-K(3)-O(220)#1   | 121.0(2)   |
| O(190)#1-K(3)-O(220)#1 | 77.3(2)    |
| O(180)-K(3)-O(220)#1   | 72.3(2)    |
| O(200)#1-K(3)-O(220)#1 | 97.7(4)    |
| O(200)-K(3)-O(220)#1   | 152.6(4)   |
| O(220)-K(3)-O(220)#1   | 57.3(2)    |
| O(230)#1-K(3)-O(210)   | 74.8(3)    |
| O(230)-K(3)-O(210)     | 74.8(3)    |
| O(190)-K(3)-O(210)     | 105.9(2)   |
| O(190)#1-K(3)-O(210)   | 105.9(2)   |
| O(180)-K(3)-O(210)     | 150.8(4)   |
| O(200)#1-K(3)-O(210)   | 54.7(3)    |
| O(200)-K(3)-O(210)     | 54.7(3)    |

|                        |           |
|------------------------|-----------|
| O(220)-K(3)-O(210)     | 131.8(3)  |
| O(220)#1-K(3)-O(210)   | 131.8(3)  |
| C(310)#1-O(180)-C(310) | 134.0(15) |
| C(310)#1-O(180)-K(3)   | 111.3(7)  |
| C(310)-O(180)-K(3)     | 111.3(7)  |
| C(330)-O(190)-C(320)   | 116.4(9)  |
| C(330)-O(190)-K(3)     | 123.0(7)  |
| C(320)-O(190)-K(3)     | 120.5(7)  |
| C(340)-O(200)-C(350)   | 123.7(11) |
| C(340)-O(200)-K(3)     | 120.2(8)  |
| C(350)-O(200)-K(3)     | 115.8(8)  |
| C(370)-O(220)-C(380)   | 115.1(11) |
| C(370)-O(220)-K(3)     | 115.3(6)  |
| C(380)-O(220)-K(3)     | 115.0(6)  |
| C(400)-O(230)-C(390)   | 116.2(9)  |
| C(400)-O(230)-K(3)     | 115.1(6)  |
| C(390)-O(230)-K(3)     | 116.8(6)  |
| C(320)-C(310)-O(180)   | 127.5(11) |
| C(320)-C(310)-H(31A)   | 105.4     |
| O(180)-C(310)-H(31A)   | 105.4     |
| C(320)-C(310)-H(31B)   | 105.4     |
| O(180)-C(310)-H(31B)   | 105.4     |
| H(31A)-C(310)-H(31B)   | 106.0     |
| C(310)-C(320)-O(190)   | 115.1(11) |
| C(310)-C(320)-H(32A)   | 108.5     |
| O(190)-C(320)-H(32A)   | 108.5     |
| C(310)-C(320)-H(32B)   | 108.5     |
| O(190)-C(320)-H(32B)   | 108.5     |
| H(32A)-C(320)-H(32B)   | 107.5     |
| O(190)-C(330)-C(340)   | 116.2(10) |
| O(190)-C(330)-H(33A)   | 108.2     |
| C(340)-C(330)-H(33A)   | 108.2     |
| O(190)-C(330)-H(33B)   | 108.2     |
| C(340)-C(330)-H(33B)   | 108.2     |
| H(33A)-C(330)-H(33B)   | 107.4     |
| O(210)-C(360)-C(350)   | 110.5(15) |

|                        |           |
|------------------------|-----------|
| O(210)-C(360)-H(36A)   | 109.5     |
| C(350)-C(360)-H(36A)   | 109.5     |
| O(210)-C(360)-H(36B)   | 109.5     |
| C(350)-C(360)-H(36B)   | 109.5     |
| H(36A)-C(360)-H(36B)   | 108.1     |
| C(370)#1-C(370)-O(220) | 124.9(5)  |
| C(370)#1-C(370)-H(37A) | 106.1     |
| O(220)-C(370)-H(37A)   | 106.1     |
| C(370)#1-C(370)-H(37B) | 106.1     |
| O(220)-C(370)-H(37B)   | 106.1     |
| H(37A)-C(370)-H(37B)   | 106.3     |
| C(390)-C(380)-O(220)   | 122.3(10) |
| C(390)-C(380)-H(38A)   | 106.8     |
| O(220)-C(380)-H(38A)   | 106.8     |
| C(390)-C(380)-H(38B)   | 106.8     |
| O(220)-C(380)-H(38B)   | 106.8     |
| H(38A)-C(380)-H(38B)   | 106.6     |
| C(380)-C(390)-O(230)   | 123.3(10) |
| C(380)-C(390)-H(39A)   | 106.5     |
| O(230)-C(390)-H(39A)   | 106.5     |
| C(380)-C(390)-H(39B)   | 106.5     |
| O(230)-C(390)-H(39B)   | 106.5     |
| H(39A)-C(390)-H(39B)   | 106.5     |
| C(2X)-O(1X)-C(3X)      | 113.5(8)  |
| O(1X)-C(3X)-C(4X)      | 110.2(9)  |
| O(1X)-C(3X)-H(3XA)     | 109.6     |
| C(4X)-C(3X)-H(3XA)     | 109.6     |
| O(1X)-C(3X)-H(3XB)     | 109.6     |
| C(4X)-C(3X)-H(3XB)     | 109.6     |
| H(3XA)-C(3X)-H(3XB)    | 108.1     |
| C(3X)-C(4X)-H(4XA)     | 109.5     |
| C(3X)-C(4X)-H(4XB)     | 109.5     |
| H(4XA)-C(4X)-H(4XB)    | 109.5     |
| C(3X)-C(4X)-H(4XC)     | 109.5     |
| H(4XA)-C(4X)-H(4XC)    | 109.5     |
| H(4XB)-C(4X)-H(4XC)    | 109.5     |



|                        |           |
|------------------------|-----------|
| C(2X)-C(1X)-H(1XA)     | 109.5     |
| C(2X)-C(1X)-H(1XB)     | 109.5     |
| H(1XA)-C(1X)-H(1XB)    | 109.5     |
| C(2X)-C(1X)-H(1XC)     | 109.5     |
| H(1XA)-C(1X)-H(1XC)    | 109.5     |
| H(1XB)-C(1X)-H(1XC)    | 109.5     |
| O(1X)-C(2X)-C(1X)      | 111.1(9)  |
| O(1X)-C(2X)-H(2XA)     | 109.4     |
| C(1X)-C(2X)-H(2XA)     | 109.4     |
| O(1X)-C(2X)-H(2XB)     | 109.4     |
| C(1X)-C(2X)-H(2XB)     | 109.4     |
| H(2XA)-C(2X)-H(2XB)    | 108.0     |
| C(400)#1-C(400)-O(230) | 123.4(5)  |
| C(400)#1-C(400)-H(40A) | 106.5     |
| O(230)-C(400)-H(40A)   | 106.5     |
| C(400)#1-C(400)-H(40B) | 106.5     |
| O(230)-C(400)-H(40B)   | 106.5     |
| H(40A)-C(400)-H(40B)   | 106.5     |
| C(360)#1-O(210)-C(360) | 102(2)    |
| C(360)#1-O(210)-K(3)   | 121.3(9)  |
| C(360)-O(210)-K(3)     | 121.3(9)  |
| O(200)-C(340)-C(330)   | 125.3(11) |
| O(200)-C(340)-H(34A)   | 106.0     |
| C(330)-C(340)-H(34A)   | 106.0     |
| O(200)-C(340)-H(34B)   | 106.0     |
| C(330)-C(340)-H(34B)   | 106.0     |
| H(34A)-C(340)-H(34B)   | 106.3     |
| C(360)-C(350)-O(200)   | 116.4(16) |
| C(360)-C(350)-H(35A)   | 108.2     |
| O(200)-C(350)-H(35A)   | 108.2     |
| C(360)-C(350)-H(35B)   | 108.2     |
| O(200)-C(350)-H(35B)   | 108.2     |
| H(35A)-C(350)-H(35B)   | 107.3     |
| C(6X)-C(5X)-O(170)     | 127.3(16) |
| C(6X)-C(5X)-H(5XA)     | 105.5     |
| O(170)-C(5X)-H(5XA)    | 105.5     |

|                     |           |
|---------------------|-----------|
| C(6X)-C(5X)-H(5XB)  | 105.5     |
| O(170)-C(5X)-H(5XB) | 105.5     |
| H(5XA)-C(5X)-H(5XB) | 106.1     |
| C(5Y)-C(6Y)-O(160)  | 123.2(16) |
| C(5Y)-C(6Y)-H(6YA)  | 106.5     |
| O(160)-C(6Y)-H(6YA) | 106.5     |
| C(5Y)-C(6Y)-H(6YB)  | 106.5     |
| O(160)-C(6Y)-H(6YB) | 106.5     |
| H(6YA)-C(6Y)-H(6YB) | 106.5     |
| C(8X)-C(7X)-O(160)  | 128.4(17) |
| C(8X)-C(7X)-H(7XA)  | 105.2     |
| O(160)-C(7X)-H(7XA) | 105.2     |
| C(8X)-C(7X)-H(7XB)  | 105.2     |
| O(160)-C(7X)-H(7XB) | 105.2     |
| H(7XA)-C(7X)-H(7XB) | 105.9     |
| C(7Y)-C(8Y)-O(150)  | 129.7(16) |
| C(7Y)-C(8Y)-H(8YA)  | 104.8     |
| O(150)-C(8Y)-H(8YA) | 104.8     |
| C(7Y)-C(8Y)-H(8YB)  | 104.8     |
| O(150)-C(8Y)-H(8YB) | 104.8     |
| H(8YA)-C(8Y)-H(8YB) | 105.8     |

---

Symmetry transformations used to generate equivalent atoms:

#1 x,-y+1/2,z

Table S-21. Anisotropic displacement parameters ( $\text{\AA}^2 \times 10^3$ ) for **4'**. The anisotropic displacement factor exponent takes the form:  $-2\pi^2 [ h^2 a^{*2} U^{11} + \dots + 2 h k a^* b^* U^{12} ]$

|        | $U^{11}$ | $U^{22}$ | $U^{33}$ | $U^{23}$ | $U^{13}$ | $U^{12}$ |
|--------|----------|----------|----------|----------|----------|----------|
| Fe(1)  | 35(1)    | 39(1)    | 28(1)    | -3(1)    | 7(1)     | -6(1)    |
| C(1)   | 49(5)    | 48(4)    | 72(5)    | -10(4)   | 5(4)     | -3(3)    |
| N(11)  | 29(3)    | 42(3)    | 22(2)    | -1(2)    | 9(2)     | -2(2)    |
| N(21)  | 29(3)    | 39(3)    | 27(2)    | -4(2)    | 2(2)     | -1(2)    |
| C(11)  | 53(4)    | 47(4)    | 50(4)    | -2(3)    | 9(3)     | 1(3)     |
| C(21)  | 41(4)    | 40(3)    | 24(3)    | -2(2)    | 3(2)     | 4(3)     |
| C(31)  | 31(3)    | 36(3)    | 29(3)    | -4(2)    | -5(2)    | -3(2)    |
| C(41)  | 38(3)    | 41(3)    | 23(3)    | 1(2)     | 1(2)     | -5(3)    |
| C(51)  | 39(4)    | 51(4)    | 41(3)    | -10(3)   | 3(3)     | -13(3)   |
| C(12)  | 46(4)    | 38(3)    | 28(3)    | -5(2)    | 16(3)    | -3(3)    |
| C(22)  | 28(3)    | 41(3)    | 30(3)    | -2(2)    | 12(2)    | 2(2)     |
| C(32)  | 41(4)    | 45(3)    | 29(3)    | 0(2)     | 10(3)    | 5(3)     |
| C(42)  | 44(4)    | 47(4)    | 47(4)    | 0(3)     | 24(3)    | -6(3)    |
| C(52)  | 43(4)    | 50(4)    | 41(4)    | -7(3)    | 2(3)     | -2(3)    |
| C(62)  | 37(4)    | 42(3)    | 34(3)    | -8(3)    | 13(3)    | -6(3)    |
| C(72)  | 51(4)    | 51(4)    | 28(3)    | 5(3)     | 11(3)    | 3(3)     |
| C(82)  | 54(5)    | 74(5)    | 44(4)    | -2(3)    | -8(3)    | 15(4)    |
| C(92)  | 56(5)    | 81(5)    | 44(4)    | -15(4)   | 3(3)     | -6(4)    |
| C(102) | 42(4)    | 60(4)    | 33(3)    | -6(3)    | -3(3)    | -14(3)   |
| C(112) | 49(4)    | 90(6)    | 38(4)    | -22(4)   | -1(3)    | -3(4)    |
| C(122) | 77(6)    | 71(5)    | 45(4)    | 10(4)    | 2(4)     | 1(4)     |
| C(13)  | 23(3)    | 45(3)    | 30(3)    | -6(2)    | -2(2)    | -5(2)    |
| C(23)  | 35(3)    | 54(4)    | 21(3)    | -4(2)    | 0(2)     | -6(3)    |
| C(33)  | 42(4)    | 62(4)    | 38(3)    | -9(3)    | -7(3)    | 0(3)     |
| C(43)  | 25(3)    | 64(4)    | 52(4)    | -9(3)    | 0(3)     | 2(3)     |
| C(53)  | 31(3)    | 58(4)    | 37(3)    | -13(3)   | 13(3)    | -11(3)   |
| C(63)  | 26(3)    | 53(4)    | 27(3)    | -4(3)    | 9(2)     | -5(3)    |
| C(73)  | 53(4)    | 54(4)    | 29(3)    | -4(3)    | -7(3)    | 5(3)     |
| C(83)  | 84(6)    | 64(5)    | 33(4)    | 0(3)     | 3(4)     | -5(4)    |
| C(93)  | 97(7)    | 73(5)    | 35(4)    | -5(4)    | -26(4)   | -15(5)   |
| C(103) | 50(4)    | 47(4)    | 27(3)    | 1(3)     | 4(3)     | -6(3)    |

|        |         |         |         |        |         |         |
|--------|---------|---------|---------|--------|---------|---------|
| C(113) | 50(4)   | 61(4)   | 36(3)   | -7(3)  | -11(3)  | 0(3)    |
| C(123) | 72(6)   | 75(6)   | 58(5)   | 20(4)  | 6(4)    | -12(4)  |
| Fe(2)  | 61(1)   | 39(1)   | 56(1)   | 8(1)   | -28(1)  | -9(1)   |
| C(2)   | 107(8)  | 48(5)   | 170(12) | 18(6)  | -56(8)  | -16(5)  |
| N(14)  | 46(3)   | 53(3)   | 23(2)   | 10(2)  | -6(2)   | -13(2)  |
| N(24)  | 38(3)   | 41(3)   | 30(2)   | 0(2)   | -1(2)   | -11(2)  |
| C(14)  | 57(5)   | 51(4)   | 46(4)   | -3(3)  | -8(3)   | -18(3)  |
| C(24)  | 37(3)   | 47(3)   | 26(3)   | 2(3)   | -1(2)   | -18(3)  |
| C(34)  | 44(4)   | 37(3)   | 30(3)   | -1(2)  | 4(3)    | -8(3)   |
| C(44)  | 32(3)   | 41(3)   | 40(3)   | 4(3)   | 5(3)    | -1(3)   |
| C(54)  | 48(4)   | 42(4)   | 87(6)   | -11(4) | -10(4)  | 6(3)    |
| C(15)  | 48(4)   | 42(3)   | 35(3)   | 7(3)   | -9(3)   | -19(3)  |
| C(25)  | 46(4)   | 42(3)   | 25(3)   | 7(2)   | -4(3)   | -10(3)  |
| C(35)  | 58(5)   | 41(3)   | 34(3)   | 9(3)   | -9(3)   | -9(3)   |
| C(45)  | 45(4)   | 46(4)   | 50(4)   | 6(3)   | 0(3)    | -8(3)   |
| C(55)  | 33(4)   | 63(4)   | 50(4)   | 3(3)   | -2(3)   | -5(3)   |
| C(65)  | 46(4)   | 67(4)   | 26(3)   | 5(3)   | 13(3)   | -18(3)  |
| C(75)  | 53(4)   | 48(4)   | 32(3)   | 6(3)   | 2(3)    | -1(3)   |
| C(85)  | 57(5)   | 63(5)   | 73(5)   | 5(4)   | 27(4)   | -6(4)   |
| C(95)  | 77(6)   | 90(6)   | 44(4)   | -16(4) | 6(4)    | 12(5)   |
| C(105) | 50(5)   | 108(7)  | 25(3)   | 6(4)   | -1(3)   | -11(4)  |
| C(115) | 143(11) | 111(8)  | 54(5)   | -20(5) | 15(6)   | -38(8)  |
| C(125) | 51(5)   | 101(6)  | 49(4)   | 35(4)  | 19(4)   | 5(4)    |
| C(16)  | 24(3)   | 35(3)   | 47(3)   | -5(3)  | 2(3)    | 0(2)    |
| C(26)  | 44(4)   | 51(4)   | 56(4)   | -11(3) | 6(3)    | -4(3)   |
| C(36)  | 28(4)   | 49(4)   | 82(6)   | -12(4) | 9(3)    | -1(3)   |
| C(46)  | 32(4)   | 52(4)   | 83(6)   | -22(4) | -10(4)  | 3(3)    |
| C(56)  | 46(4)   | 43(4)   | 56(4)   | -10(3) | -13(3)  | 6(3)    |
| C(66)  | 32(3)   | 31(3)   | 42(3)   | -6(2)  | -3(3)   | 3(2)    |
| C(76)  | 66(5)   | 82(6)   | 61(5)   | -15(4) | 34(4)   | -31(4)  |
| C(86)  | 49(6)   | 219(14) | 98(8)   | -84(9) | 43(5)   | -38(7)  |
| C(96)  | 280(20) | 108(10) | 79(8)   | 21(7)  | -11(11) | -70(12) |
| C(106) | 40(4)   | 45(4)   | 34(3)   | -6(3)  | -6(3)   | 0(3)    |
| C(116) | 61(5)   | 53(4)   | 54(4)   | -4(3)  | 12(4)   | 1(4)    |
| C(126) | 85(6)   | 62(5)   | 54(5)   | 10(4)  | -10(4)  | -6(4)   |
| K(1)   | 51(1)   | 40(1)   | 38(1)   | -2(1)  | 6(1)    | 2(1)    |

|        |        |        |        |        |        |        |
|--------|--------|--------|--------|--------|--------|--------|
| O(10)  | 72(4)  | 62(3)  | 75(4)  | 0(3)   | 10(3)  | -10(3) |
| O(20)  | 70(4)  | 66(3)  | 50(3)  | -7(2)  | -7(3)  | 5(3)   |
| O(30)  | 95(5)  | 53(3)  | 62(3)  | 2(3)   | -4(3)  | 12(3)  |
| O(40)  | 87(4)  | 51(3)  | 57(3)  | -10(2) | -5(3)  | 0(3)   |
| O(50)  | 57(3)  | 78(4)  | 43(3)  | -7(2)  | -9(2)  | 8(3)   |
| O(60)  | 106(5) | 61(3)  | 56(3)  | 9(3)   | 23(3)  | 12(3)  |
| O(70)  | 50(3)  | 61(3)  | 48(3)  | -6(2)  | -4(2)  | 6(2)   |
| O(80)  | 83(4)  | 66(3)  | 49(3)  | 3(2)   | 10(3)  | 11(3)  |
| O(90)  | 67(4)  | 60(3)  | 73(4)  | -4(3)  | 21(3)  | 2(3)   |
| O(100) | 64(4)  | 80(4)  | 63(3)  | -12(3) | 3(3)   | -2(3)  |
| C(10)  | 61(6)  | 67(6)  | 123(9) | -18(6) | -10(6) | -15(5) |
| C(20)  | 80(7)  | 84(7)  | 85(7)  | -11(5) | -25(5) | -3(5)  |
| C(30)  | 80(6)  | 94(7)  | 44(4)  | 9(4)   | -11(4) | 7(5)   |
| C(40)  | 65(5)  | 70(5)  | 53(4)  | 12(4)  | -9(4)  | 12(4)  |
| C(50)  | 76(6)  | 41(4)  | 84(6)  | 14(4)  | 13(5)  | 10(4)  |
| C(60)  | 89(7)  | 38(4)  | 76(5)  | 5(4)   | 5(5)   | -6(4)  |
| C(70)  | 76(6)  | 66(5)  | 73(6)  | -21(4) | 3(5)   | -2(5)  |
| C(80)  | 73(6)  | 83(6)  | 48(4)  | -24(4) | -4(4)  | -7(5)  |
| C(90)  | 98(7)  | 79(6)  | 50(5)  | 4(4)   | 10(5)  | 22(5)  |
| C(100) | 98(7)  | 77(6)  | 39(4)  | 15(4)  | 20(4)  | 31(5)  |
| C(110) | 111(8) | 55(5)  | 76(6)  | 12(4)  | 16(6)  | 5(5)   |
| C(120) | 93(7)  | 66(6)  | 90(7)  | 13(5)  | 25(6)  | -27(5) |
| C(130) | 64(5)  | 63(5)  | 51(4)  | -19(4) | -9(4)  | 10(4)  |
| C(140) | 89(6)  | 70(5)  | 48(4)  | -12(4) | 12(4)  | 13(5)  |
| C(150) | 95(7)  | 80(6)  | 53(5)  | 16(4)  | -1(5)  | 9(5)   |
| C(160) | 87(7)  | 77(6)  | 78(6)  | 17(5)  | 43(5)  | 12(5)  |
| C(170) | 52(5)  | 76(6)  | 101(7) | -16(5) | 16(5)  | -13(4) |
| C(180) | 70(6)  | 101(8) | 81(6)  | -7(6)  | 4(5)   | -8(6)  |
| C(190) | 71(6)  | 67(5)  | 58(5)  | -6(4)  | -17(4) | 3(4)   |
| C(200) | 53(5)  | 69(5)  | 61(5)  | -9(4)  | -2(4)  | 12(4)  |
| K(2)   | 34(1)  | 38(1)  | 34(1)  | 0      | -1(1)  | 0      |
| O(110) | 56(5)  | 86(5)  | 35(3)  | 0      | 6(3)   | 0      |
| O(120) | 55(3)  | 56(3)  | 65(3)  | -22(2) | 0(3)   | -7(2)  |
| O(130) | 59(3)  | 43(3)  | 56(3)  | -4(2)  | 2(2)   | -6(2)  |
| O(140) | 44(4)  | 58(4)  | 34(3)  | 0      | 4(3)   | 0      |
| O(150) | 39(4)  | 103(5) | 36(3)  | 0      | 2(3)   | 0      |

|        |         |         |         |         |         |         |
|--------|---------|---------|---------|---------|---------|---------|
| O(160) | 43(3)   | 53(3)   | 61(3)   | -3(2)   | -2(2)   | 4(2)    |
| C(210) | 83(7)   | 109(7)  | 43(4)   | -25(5)  | 3(4)    | -3(5)   |
| C(220) | 80(7)   | 87(6)   | 65(5)   | -26(5)  | 0(5)    | -15(5)  |
| C(230) | 59(5)   | 39(4)   | 99(6)   | -11(4)  | -2(5)   | -2(3)   |
| C(240) | 67(5)   | 43(4)   | 77(5)   | -3(4)   | 6(4)    | -10(4)  |
| C(250) | 47(4)   | 56(4)   | 67(5)   | 19(4)   | 9(4)    | -12(3)  |
| C(260) | 59(5)   | 66(5)   | 46(4)   | 13(4)   | 14(3)   | -4(4)   |
| C(8X)  | 80(12)  | 152(10) | 138(19) | 50(11)  | 54(13)  | 47(9)   |
| C(7Y)  | 39(6)   | 65(8)   | 58(7)   | 3(6)    | -4(5)   | 0(5)    |
| C(6X)  | 47(7)   | 67(8)   | 55(6)   | 1(5)    | -4(5)   | 4(6)    |
| C(5Y)  | 97(14)  | 120(9)  | 42(8)   | -7(6)   | -14(8)  | 43(9)   |
| O(170) | 42(4)   | 84(4)   | 42(4)   | 0       | 4(3)    | 0       |
| K(3)   | 40(1)   | 60(1)   | 36(1)   | 0       | 4(1)    | 0       |
| O(180) | 69(5)   | 93(5)   | 57(5)   | 0       | 20(4)   | 0       |
| O(190) | 235(10) | 81(4)   | 78(4)   | 6(3)    | 44(5)   | 76(5)   |
| O(200) | 336(17) | 246(11) | 214(9)  | 178(8)  | 167(11) | 190(12) |
| O(220) | 69(4)   | 85(4)   | 57(3)   | -7(3)   | -5(3)   | -8(3)   |
| O(230) | 65(4)   | 79(4)   | 61(3)   | -4(3)   | 8(3)    | -14(3)  |
| C(310) | 201(10) | 131(6)  | 99(6)   | 7(4)    | 54(6)   | 66(6)   |
| C(320) | 201(10) | 131(6)  | 99(6)   | 7(4)    | 54(6)   | 66(6)   |
| C(330) | 86(7)   | 73(6)   | 149(8)  | 32(5)   | -4(6)   | 4(5)    |
| C(360) | 162(14) | 409(18) | 192(13) | 101(10) | 100(11) | 101(12) |
| C(370) | 215(14) | 111(7)  | 60(5)   | -12(5)  | -36(7)  | -7(7)   |
| C(380) | 164(11) | 120(8)  | 94(6)   | -36(5)  | 37(6)   | -70(8)  |
| C(390) | 137(9)  | 131(8)  | 77(5)   | -25(5)  | 18(5)   | -64(7)  |
| O(1X)  | 70(4)   | 95(5)   | 74(4)   | -11(3)  | 13(3)   | 6(4)    |
| C(3X)  | 76(7)   | 106(8)  | 77(6)   | 13(6)   | -1(5)   | -1(6)   |
| C(4X)  | 81(7)   | 99(7)   | 65(6)   | 4(5)    | -2(5)   | 10(6)   |
| C(1X)  | 112(9)  | 89(8)   | 125(10) | -20(7)  | 46(8)   | -20(7)  |
| C(2X)  | 68(6)   | 134(10) | 77(6)   | 6(6)    | 31(5)   | -3(6)   |
| C(400) | 115(8)  | 112(8)  | 204(13) | 11(7)   | 101(9)  | -6(6)   |
| O(210) | 103(10) | 321(17) | 77(8)   | 0       | 8(8)    | 0       |
| C(340) | 142(11) | 96(8)   | 137(8)  | 44(6)   | 2(7)    | 4(7)    |
| C(350) | 228(17) | 306(15) | 152(10) | 150(9)  | 92(11)  | 110(11) |
| C(5X)  | 102(14) | 124(9)  | 34(7)   | 16(6)   | -2(7)   | 52(9)   |
| C(6Y)  | 54(9)   | 85(8)   | 50(6)   | 9(5)    | -4(5)   | 24(7)   |

|       |        |         |       |       |        |        |
|-------|--------|---------|-------|-------|--------|--------|
| C(7X) | 28(7)  | 90(8)   | 58(6) | -3(5) | -14(5) | 22(6)  |
| C(8Y) | 94(15) | 152(10) | 62(8) | 33(7) | 46(9)  | 68(10) |

---

Table S-22. Hydrogen coordinates ( $\times 10^4$ ) and isotropic displacement parameters ( $\text{\AA}^2 \times 10^{-3}$ ) for **4'**.

|        | x     | y    | z    | U(eq) |
|--------|-------|------|------|-------|
| H(1A)  | -1957 | 3451 | 4726 | 85    |
| H(1B)  | -733  | 3396 | 4641 | 85    |
| H(1C)  | -1400 | 3505 | 3984 | 85    |
| H(11G) | -2955 | 4639 | 5382 | 75    |
| H(11H) | -2007 | 4811 | 5705 | 75    |
| H(11I) | -2518 | 4570 | 6155 | 75    |
| H(31)  | -463  | 4714 | 5248 | 38    |
| H(51A) | 1859  | 4438 | 5042 | 65    |
| H(51B) | 1223  | 4719 | 5041 | 65    |
| H(51C) | 1445  | 4564 | 4313 | 65    |
| H(32)  | -3445 | 3844 | 7199 | 46    |
| H(42)  | -4930 | 3717 | 6586 | 55    |
| H(52)  | -5108 | 3834 | 5396 | 54    |
| H(72)  | -1209 | 4183 | 6469 | 52    |
| H(82A) | -1412 | 3668 | 7170 | 86    |
| H(82B) | -338  | 3827 | 7049 | 86    |
| H(82C) | -955  | 3702 | 6389 | 86    |
| H(92A) | -2124 | 4371 | 7417 | 91    |
| H(92B) | -1106 | 4219 | 7708 | 91    |
| H(92C) | -2227 | 4078 | 7780 | 91    |
| H(102) | -3215 | 4189 | 4357 | 54    |
| H(11J) | -3312 | 3724 | 4087 | 88    |
| H(11K) | -4058 | 3889 | 3560 | 88    |
| H(11L) | -4548 | 3725 | 4210 | 88    |
| H(12G) | -5439 | 4170 | 4522 | 97    |
| H(12H) | -4827 | 4335 | 3923 | 97    |
| H(12I) | -4747 | 4429 | 4731 | 97    |
| H(33)  | 3045  | 3582 | 4982 | 57    |
| H(43)  | 3549  | 3628 | 3838 | 56    |
| H(53)  | 2584  | 3894 | 3060 | 50    |



|        |      |      |       |     |
|--------|------|------|-------|-----|
| H(73)  | 791  | 3897 | 5771  | 54  |
| H(83A) | 781  | 3418 | 5570  | 91  |
| H(83B) | 951  | 3492 | 6385  | 91  |
| H(83C) | 1922 | 3399 | 5913  | 91  |
| H(93A) | 2892 | 3823 | 6200  | 103 |
| H(93B) | 1959 | 3938 | 6675  | 103 |
| H(93C) | 2395 | 4114 | 6029  | 103 |
| H(103) | 350  | 4295 | 3520  | 50  |
| H(11M) | 550  | 3857 | 2532  | 74  |
| H(11N) | -328 | 4089 | 2493  | 74  |
| H(11O) | -326 | 3876 | 3132  | 74  |
| H(12J) | 1935 | 4468 | 3036  | 103 |
| H(12K) | 1014 | 4467 | 2462  | 103 |
| H(12L) | 1899 | 4237 | 2442  | 103 |
| H(0AA) | 3440 | 4100 | 10500 | 163 |
| H(0AB) | 4348 | 4141 | 9931  | 163 |
| H(0AC) | 4636 | 4096 | 10746 | 163 |
| H(14A) | 1870 | 2968 | 9669  | 77  |
| H(14B) | 2732 | 2736 | 9547  | 77  |
| H(14C) | 2518 | 2959 | 8947  | 77  |
| H(34)  | 4232 | 2793 | 10060 | 44  |
| H(54A) | 6611 | 2960 | 10514 | 88  |
| H(54B) | 5768 | 2723 | 10620 | 88  |
| H(54C) | 5988 | 2936 | 11243 | 88  |
| H(35)  | 1614 | 3599 | 7758  | 53  |
| H(45)  | 113  | 3748 | 8307  | 57  |
| H(55)  | 103  | 3783 | 9557  | 58  |
| H(75)  | 3800 | 3288 | 8564  | 53  |
| H(85A) | 3755 | 3805 | 7870  | 96  |
| H(85B) | 4771 | 3617 | 7924  | 96  |
| H(85C) | 4278 | 3747 | 8623  | 96  |
| H(95A) | 2820 | 3106 | 7635  | 105 |
| H(95B) | 3918 | 3216 | 7352  | 105 |
| H(95C) | 2878 | 3390 | 7222  | 105 |
| H(105) | 2184 | 3576 | 10704 | 73  |
| H(11A) | 1541 | 4032 | 10588 | 154 |

|        |      |      |       |     |
|--------|------|------|-------|-----|
| H(11B) | 1167 | 3891 | 11307 | 154 |
| H(11C) | 376  | 3917 | 10655 | 154 |
| H(12A) | 46   | 3417 | 10571 | 100 |
| H(12B) | 672  | 3411 | 11303 | 100 |
| H(12C) | 1014 | 3215 | 10670 | 100 |
| H(36)  | 8390 | 3735 | 10671 | 64  |
| H(46)  | 8401 | 3745 | 11892 | 67  |
| H(56)  | 6941 | 3584 | 12513 | 58  |
| H(76)  | 6362 | 3446 | 9593  | 84  |
| H(86A) | 7920 | 3385 | 8959  | 183 |
| H(86B) | 7962 | 3214 | 9678  | 183 |
| H(86C) | 8585 | 3495 | 9616  | 183 |
| H(96A) | 6278 | 3924 | 9571  | 233 |
| H(96B) | 6901 | 3817 | 8894  | 233 |
| H(96C) | 7525 | 3943 | 9550  | 233 |
| H(106) | 4715 | 3263 | 11729 | 48  |
| H(11D) | 4752 | 3751 | 12548 | 84  |
| H(11E) | 3750 | 3562 | 12422 | 84  |
| H(11F) | 4244 | 3729 | 11777 | 84  |
| H(12D) | 5776 | 3076 | 12636 | 101 |
| H(12E) | 4677 | 3174 | 12946 | 101 |
| H(12F) | 5701 | 3355 | 13068 | 101 |
| H(10A) | 371  | 4618 | 7642  | 101 |
| H(10B) | 723  | 4349 | 7226  | 101 |
| H(20A) | 1789 | 4615 | 6518  | 99  |
| H(20B) | 578  | 4689 | 6435  | 99  |
| H(30A) | 887  | 5138 | 6066  | 87  |
| H(30B) | 2126 | 5091 | 6085  | 87  |
| H(40C) | 1691 | 5551 | 6220  | 75  |
| H(40D) | 1066 | 5477 | 6927  | 75  |
| H(50A) | 2155 | 5728 | 7680  | 81  |
| H(50B) | 2698 | 5841 | 6976  | 81  |
| H(60A) | 4329 | 5669 | 7376  | 81  |
| H(60B) | 3873 | 5892 | 7907  | 81  |
| H(70A) | 2610 | 5624 | 8867  | 86  |
| H(70B) | 3663 | 5790 | 9038  | 86  |

|        |      |      |       |     |
|--------|------|------|-------|-----|
| H(80A) | 4418 | 5371 | 9470  | 81  |
| H(80B) | 3465 | 5476 | 9946  | 81  |
| H(90A) | 3198 | 5017 | 10314 | 91  |
| H(90B) | 4128 | 4917 | 9811  | 91  |
| H(10C) | 2888 | 4568 | 10060 | 85  |
| H(10D) | 2027 | 4741 | 9640  | 85  |
| H(11P) | 2511 | 4229 | 9266  | 97  |
| H(11Q) | 3139 | 4234 | 8536  | 97  |
| H(12M) | 1350 | 4198 | 8356  | 100 |
| H(12N) | 1184 | 4484 | 8746  | 100 |
| H(13A) | 3303 | 4345 | 6987  | 72  |
| H(13B) | 4362 | 4172 | 6961  | 72  |
| H(14D) | 5217 | 4539 | 6395  | 83  |
| H(14E) | 4223 | 4443 | 5940  | 83  |
| H(15A) | 4151 | 5160 | 6046  | 91  |
| H(15B) | 4835 | 4933 | 5656  | 91  |
| H(16A) | 6009 | 4926 | 6620  | 97  |
| H(16B) | 5934 | 5226 | 6289  | 97  |
| H(17A) | 5710 | 5355 | 8080  | 91  |
| H(17B) | 6579 | 5330 | 7478  | 91  |
| H(18A) | 6658 | 4848 | 7682  | 101 |
| H(18B) | 6979 | 5017 | 8376  | 101 |
| H(19A) | 5209 | 4506 | 8902  | 79  |
| H(19B) | 6398 | 4528 | 8652  | 79  |
| H(20C) | 5893 | 4455 | 7465  | 73  |
| H(20D) | 5465 | 4209 | 7945  | 73  |
| H(21A) | 1545 | 2744 | 15152 | 94  |
| H(21B) | 378  | 2743 | 14843 | 94  |
| H(22A) | 1285 | 3148 | 14566 | 93  |
| H(22B) | 2109 | 2971 | 14123 | 93  |
| H(23A) | 863  | 3393 | 13609 | 78  |
| H(23B) | 162  | 3261 | 12997 | 78  |
| H(24A) | 1788 | 3401 | 12549 | 75  |
| H(24B) | 2371 | 3202 | 13095 | 75  |
| H(25A) | 3105 | 2954 | 12166 | 68  |
| H(25B) | 2546 | 3147 | 11597 | 68  |

|        |       |      |       |     |
|--------|-------|------|-------|-----|
| H(26A) | 1644  | 2756 | 11146 | 68  |
| H(26B) | 2887  | 2733 | 11050 | 68  |
| H(8XA) | -2877 | 2700 | 13291 | 148 |
| H(8XB) | -2340 | 2815 | 13999 | 148 |
| H(7YA) | -2271 | 3103 | 12846 | 65  |
| H(7YB) | -2593 | 2818 | 12478 | 65  |
| H(6XA) | -2344 | 2781 | 11954 | 68  |
| H(6XB) | -1902 | 3080 | 11757 | 68  |
| H(5YA) | -1001 | 2800 | 10769 | 104 |
| H(5YB) | -1953 | 2685 | 11231 | 104 |
| H(31A) | 5607  | 2730 | 9034  | 173 |
| H(31B) | 6769  | 2836 | 9100  | 173 |
| H(32A) | 6168  | 3135 | 8532  | 173 |
| H(32B) | 5299  | 2948 | 8169  | 173 |
| H(33A) | 6720  | 3332 | 7525  | 123 |
| H(33B) | 5779  | 3184 | 7125  | 123 |
| H(36A) | 7322  | 2691 | 5304  | 305 |
| H(36B) | 8492  | 2715 | 5012  | 305 |
| H(37A) | 10076 | 2686 | 9262  | 155 |
| H(37B) | 8905  | 2686 | 9530  | 155 |
| H(38A) | 9505  | 3155 | 8435  | 151 |
| H(38B) | 10403 | 2957 | 8699  | 151 |
| H(39A) | 10986 | 2954 | 7773  | 138 |
| H(39B) | 10090 | 3153 | 7510  | 138 |
| H(3XA) | -614  | 5208 | 9348  | 104 |
| H(3XB) | -1007 | 5124 | 8573  | 104 |
| H(4XA) | 1076  | 5225 | 8950  | 123 |
| H(4XB) | 354   | 5424 | 8493  | 123 |
| H(4XC) | 697   | 5135 | 8178  | 123 |
| H(1XA) | -759  | 4299 | 9148  | 163 |
| H(1XB) | -1322 | 4339 | 9894  | 163 |
| H(1XC) | -108  | 4409 | 9811  | 163 |
| H(2XA) | -1655 | 4697 | 9041  | 112 |
| H(2XB) | -1276 | 4800 | 9803  | 112 |
| H(40A) | 10800 | 2691 | 6431  | 172 |
| H(40B) | 11372 | 2691 | 7175  | 172 |

|        |       |      |       |     |
|--------|-------|------|-------|-----|
| H(34A) | 6594  | 3180 | 6264  | 150 |
| H(34B) | 7532  | 3325 | 6662  | 150 |
| H(35A) | 7927  | 3101 | 5515  | 274 |
| H(35B) | 8949  | 2981 | 5883  | 274 |
| H(5XA) | -411  | 2902 | 11407 | 104 |
| H(5XB) | -1359 | 2792 | 10953 | 104 |
| H(6YA) | -1596 | 3073 | 11627 | 76  |
| H(6YB) | -375  | 3019 | 11601 | 76  |
| H(7XA) | -1236 | 3022 | 13483 | 71  |
| H(7XB) | -2233 | 3063 | 13002 | 71  |
| H(8YA) | -2609 | 2786 | 13647 | 123 |
| H(8YB) | -1457 | 2899 | 13687 | 123 |

---

Table S-23. Torsion angles [°] for **4'**.

---

|                          |           |
|--------------------------|-----------|
| C(12)-N(11)-C(21)-C(31)  | 163.1(5)  |
| Fe(1)-N(11)-C(21)-C(31)  | -6.4(8)   |
| C(12)-N(11)-C(21)-C(11)  | -16.5(8)  |
| Fe(1)-N(11)-C(21)-C(11)  | 174.0(4)  |
| N(11)-C(21)-C(31)-C(41)  | -1.9(10)  |
| C(11)-C(21)-C(31)-C(41)  | 177.7(6)  |
| C(13)-N(21)-C(41)-C(31)  | -176.7(5) |
| Fe(1)-N(21)-C(41)-C(31)  | 1.0(8)    |
| C(13)-N(21)-C(41)-C(51)  | 2.4(8)    |
| Fe(1)-N(21)-C(41)-C(51)  | -179.9(4) |
| C(21)-C(31)-C(41)-N(21)  | 5.0(10)   |
| C(21)-C(31)-C(41)-C(51)  | -174.2(6) |
| C(21)-N(11)-C(12)-C(62)  | 109.2(7)  |
| Fe(1)-N(11)-C(12)-C(62)  | -80.6(6)  |
| C(21)-N(11)-C(12)-C(22)  | -77.4(7)  |
| Fe(1)-N(11)-C(12)-C(22)  | 92.8(5)   |
| C(62)-C(12)-C(22)-C(32)  | 0.1(9)    |
| N(11)-C(12)-C(22)-C(32)  | -173.4(5) |
| C(62)-C(12)-C(22)-C(72)  | 177.9(6)  |
| N(11)-C(12)-C(22)-C(72)  | 4.4(8)    |
| C(12)-C(22)-C(32)-C(42)  | 2.9(9)    |
| C(72)-C(22)-C(32)-C(42)  | -174.9(6) |
| C(22)-C(32)-C(42)-C(52)  | -3.8(10)  |
| C(32)-C(42)-C(52)-C(62)  | 1.7(10)   |
| C(42)-C(52)-C(62)-C(12)  | 1.2(10)   |
| C(42)-C(52)-C(62)-C(102) | -178.0(6) |
| N(11)-C(12)-C(62)-C(52)  | 171.3(6)  |
| C(22)-C(12)-C(62)-C(52)  | -2.1(9)   |
| N(11)-C(12)-C(62)-C(102) | -9.5(9)   |
| C(22)-C(12)-C(62)-C(102) | 177.1(6)  |
| C(32)-C(22)-C(72)-C(92)  | -48.1(8)  |
| C(12)-C(22)-C(72)-C(92)  | 134.2(6)  |
| C(32)-C(22)-C(72)-C(82)  | 75.7(7)   |
| C(12)-C(22)-C(72)-C(82)  | -102.1(7) |

|                           |           |
|---------------------------|-----------|
| C(52)-C(62)-C(102)-C(112) | -65.9(8)  |
| C(12)-C(62)-C(102)-C(112) | 114.9(7)  |
| C(52)-C(62)-C(102)-C(122) | 57.5(8)   |
| C(12)-C(62)-C(102)-C(122) | -121.7(7) |
| C(41)-N(21)-C(13)-C(63)   | -83.6(7)  |
| Fe(1)-N(21)-C(13)-C(63)   | 98.6(6)   |
| C(41)-N(21)-C(13)-C(23)   | 99.5(6)   |
| Fe(1)-N(21)-C(13)-C(23)   | -78.3(6)  |
| C(63)-C(13)-C(23)-C(33)   | 1.1(9)    |
| N(21)-C(13)-C(23)-C(33)   | 178.0(5)  |
| C(63)-C(13)-C(23)-C(73)   | 179.3(6)  |
| N(21)-C(13)-C(23)-C(73)   | -3.8(9)   |
| C(13)-C(23)-C(33)-C(43)   | 0.1(10)   |
| C(73)-C(23)-C(33)-C(43)   | -178.1(7) |
| C(23)-C(33)-C(43)-C(53)   | -0.5(11)  |
| C(33)-C(43)-C(53)-C(63)   | -0.2(10)  |
| C(43)-C(53)-C(63)-C(13)   | 1.3(9)    |
| C(43)-C(53)-C(63)-C(103)  | -176.8(6) |
| C(23)-C(13)-C(63)-C(53)   | -1.8(9)   |
| N(21)-C(13)-C(63)-C(53)   | -178.7(5) |
| C(23)-C(13)-C(63)-C(103)  | 176.3(5)  |
| N(21)-C(13)-C(63)-C(103)  | -0.5(9)   |
| C(33)-C(23)-C(73)-C(93)   | 66.4(9)   |
| C(13)-C(23)-C(73)-C(93)   | -111.7(7) |
| C(33)-C(23)-C(73)-C(83)   | -60.0(9)  |
| C(13)-C(23)-C(73)-C(83)   | 121.9(7)  |
| C(53)-C(63)-C(103)-C(113) | 79.5(7)   |
| C(13)-C(63)-C(103)-C(113) | -98.6(7)  |
| C(53)-C(63)-C(103)-C(123) | -45.0(8)  |
| C(13)-C(63)-C(103)-C(123) | 137.0(7)  |
| C(15)-N(14)-C(24)-C(34)   | 173.7(6)  |
| Fe(2)-N(14)-C(24)-C(34)   | -2.0(8)   |
| C(15)-N(14)-C(24)-C(14)   | -7.2(8)   |
| Fe(2)-N(14)-C(24)-C(14)   | 177.0(4)  |
| N(14)-C(24)-C(34)-C(44)   | 0.5(10)   |
| C(14)-C(24)-C(34)-C(44)   | -178.6(6) |

|                           |           |
|---------------------------|-----------|
| C(16)-N(24)-C(44)-C(34)   | 178.7(5)  |
| Fe(2)-N(24)-C(44)-C(34)   | 1.1(8)    |
| C(16)-N(24)-C(44)-C(54)   | -1.6(8)   |
| Fe(2)-N(24)-C(44)-C(54)   | -179.1(5) |
| C(24)-C(34)-C(44)-N(24)   | 0.0(10)   |
| C(24)-C(34)-C(44)-C(54)   | -179.7(7) |
| C(24)-N(14)-C(15)-C(65)   | 108.2(7)  |
| Fe(2)-N(14)-C(15)-C(65)   | -75.8(7)  |
| C(24)-N(14)-C(15)-C(25)   | -74.8(7)  |
| Fe(2)-N(14)-C(15)-C(25)   | 101.2(6)  |
| C(65)-C(15)-C(25)-C(35)   | -4.5(9)   |
| N(14)-C(15)-C(25)-C(35)   | 178.5(5)  |
| C(65)-C(15)-C(25)-C(75)   | 171.3(6)  |
| N(14)-C(15)-C(25)-C(75)   | -5.7(9)   |
| C(15)-C(25)-C(35)-C(45)   | 0.7(10)   |
| C(75)-C(25)-C(35)-C(45)   | -175.1(6) |
| C(25)-C(35)-C(45)-C(55)   | 3.9(10)   |
| C(35)-C(45)-C(55)-C(65)   | -4.9(10)  |
| C(45)-C(55)-C(65)-C(15)   | 1.3(10)   |
| C(45)-C(55)-C(65)-C(105)  | -178.6(7) |
| N(14)-C(15)-C(65)-C(55)   | -179.5(6) |
| C(25)-C(15)-C(65)-C(55)   | 3.5(10)   |
| N(14)-C(15)-C(65)-C(105)  | 0.3(10)   |
| C(25)-C(15)-C(65)-C(105)  | -176.7(6) |
| C(35)-C(25)-C(75)-C(95)   | -39.9(9)  |
| C(15)-C(25)-C(75)-C(95)   | 144.4(7)  |
| C(35)-C(25)-C(75)-C(85)   | 86.6(8)   |
| C(15)-C(25)-C(75)-C(85)   | -89.1(7)  |
| C(55)-C(65)-C(105)-C(125) | 75.3(9)   |
| C(15)-C(65)-C(105)-C(125) | -104.5(8) |
| C(55)-C(65)-C(105)-C(115) | -45.9(10) |
| C(15)-C(65)-C(105)-C(115) | 134.2(8)  |
| C(44)-N(24)-C(16)-C(26)   | 98.1(7)   |
| Fe(2)-N(24)-C(16)-C(26)   | -84.2(6)  |
| C(44)-N(24)-C(16)-C(66)   | -84.0(7)  |
| Fe(2)-N(24)-C(16)-C(66)   | 93.6(6)   |



|                           |           |
|---------------------------|-----------|
| N(24)-C(16)-C(26)-C(36)   | 176.9(6)  |
| C(66)-C(16)-C(26)-C(36)   | -1.0(10)  |
| N(24)-C(16)-C(26)-C(76)   | -1.9(10)  |
| C(66)-C(16)-C(26)-C(76)   | -179.8(7) |
| C(16)-C(26)-C(36)-C(46)   | 2.0(11)   |
| C(76)-C(26)-C(36)-C(46)   | -179.2(8) |
| C(26)-C(36)-C(46)-C(56)   | -1.4(11)  |
| C(36)-C(46)-C(56)-C(66)   | -0.3(10)  |
| C(46)-C(56)-C(66)-C(16)   | 1.2(9)    |
| C(46)-C(56)-C(66)-C(106)  | -176.9(6) |
| C(26)-C(16)-C(66)-C(56)   | -0.6(9)   |
| N(24)-C(16)-C(66)-C(56)   | -178.5(5) |
| C(26)-C(16)-C(66)-C(106)  | 177.5(6)  |
| N(24)-C(16)-C(66)-C(106)  | -0.4(8)   |
| C(36)-C(26)-C(76)-C(86)   | 55.6(11)  |
| C(16)-C(26)-C(76)-C(86)   | -125.7(8) |
| C(36)-C(26)-C(76)-C(96)   | -69.5(13) |
| C(16)-C(26)-C(76)-C(96)   | 109.3(11) |
| C(56)-C(66)-C(106)-C(116) | 83.4(7)   |
| C(16)-C(66)-C(106)-C(116) | -94.6(7)  |
| C(56)-C(66)-C(106)-C(126) | -39.9(8)  |
| C(16)-C(66)-C(106)-C(126) | 142.0(6)  |
| C(120)-O(10)-C(10)-C(20)  | 175.4(8)  |
| K(1)-O(10)-C(10)-C(20)    | 32.3(10)  |
| C(30)-O(20)-C(20)-C(10)   | -172.8(8) |
| K(1)-O(20)-C(20)-C(10)    | 63.2(9)   |
| O(10)-C(10)-C(20)-O(20)   | -65.6(11) |
| C(20)-O(20)-C(30)-C(40)   | 176.0(8)  |
| K(1)-O(20)-C(30)-C(40)    | -61.6(8)  |
| C(50)-O(30)-C(40)-C(30)   | -173.6(7) |
| K(1)-O(30)-C(40)-C(30)    | -32.1(8)  |
| O(20)-C(30)-C(40)-O(30)   | 63.6(10)  |
| C(40)-O(30)-C(50)-C(60)   | -177.2(7) |
| K(1)-O(30)-C(50)-C(60)    | 39.7(8)   |
| C(70)-O(40)-C(60)-C(50)   | -83.8(9)  |
| K(1)-O(40)-C(60)-C(50)    | 53.7(8)   |

|                             |           |
|-----------------------------|-----------|
| O(30)-C(50)-C(60)-O(40)     | -63.6(9)  |
| C(60)-O(40)-C(70)-C(80)     | -171.1(7) |
| K(1)-O(40)-C(70)-C(80)      | 53.5(8)   |
| C(90)-O(50)-C(80)-C(70)     | 177.7(7)  |
| K(1)-O(50)-C(80)-C(70)      | 49.4(8)   |
| O(40)-C(70)-C(80)-O(50)     | -68.7(9)  |
| C(80)-O(50)-C(90)-C(100)    | 179.9(7)  |
| K(1)-O(50)-C(90)-C(100)     | -52.1(8)  |
| C(110)-O(60)-C(100)-C(90)   | 177.9(8)  |
| K(1)-O(60)-C(100)-C(90)     | -46.8(9)  |
| O(50)-C(90)-C(100)-O(60)    | 67.7(9)   |
| C(100)-O(60)-C(110)-C(120)  | 85.8(9)   |
| K(1)-O(60)-C(110)-C(120)    | -51.0(9)  |
| C(10)-O(10)-C(120)-C(110)   | 173.7(8)  |
| K(1)-O(10)-C(120)-C(110)    | -41.3(9)  |
| O(60)-C(110)-C(120)-O(10)   | 63.0(11)  |
| C(200)-O(70)-C(130)-C(140)  | -82.2(8)  |
| K(1)-O(70)-C(130)-C(140)    | 67.1(7)   |
| C(200)-O(70)-C(130)-K(1)    | -149.3(7) |
| C(150)-O(80)-C(140)-C(130)  | 153.9(7)  |
| K(1)-O(80)-C(140)-C(130)    | 22.8(9)   |
| O(70)-C(130)-C(140)-O(80)   | -60.3(9)  |
| K(1)-C(130)-C(140)-O(80)    | -16.5(6)  |
| C(140)-O(80)-C(150)-C(160)  | -77.7(9)  |
| K(1)-O(80)-C(150)-C(160)    | 57.0(8)   |
| C(170)-O(90)-C(160)-C(150)  | 170.3(7)  |
| K(1)-O(90)-C(160)-C(150)    | 32.0(9)   |
| O(80)-C(150)-C(160)-O(90)   | -60.5(10) |
| C(160)-O(90)-C(170)-C(180)  | -76.0(9)  |
| K(1)-O(90)-C(170)-C(180)    | 66.0(8)   |
| C(190)-O(100)-C(180)-C(170) | 155.0(7)  |
| K(1)-O(100)-C(180)-C(170)   | 28.2(9)   |
| O(90)-C(170)-C(180)-O(100)  | -63.5(10) |
| C(180)-O(100)-C(190)-C(200) | -77.4(9)  |
| K(1)-O(100)-C(190)-C(200)   | 53.3(8)   |
| C(130)-O(70)-C(200)-C(190)  | 173.6(7)  |

|                               |            |
|-------------------------------|------------|
| K(1)-O(70)-C(200)-C(190)      | 31.6(9)    |
| O(100)-C(190)-C(200)-O(70)    | -57.1(10)  |
| C(210)#1-O(110)-C(210)-C(220) | -179.8(5)  |
| K(2)-O(110)-C(210)-C(220)     | -46.7(9)   |
| C(230)-O(120)-C(220)-C(210)   | 172.3(7)   |
| K(2)-O(120)-C(220)-C(210)     | -50.5(9)   |
| O(110)-C(210)-C(220)-O(120)   | 65.0(10)   |
| C(220)-O(120)-C(230)-C(240)   | 79.8(9)    |
| K(2)-O(120)-C(230)-C(240)     | -58.5(7)   |
| C(250)-O(130)-C(240)-C(230)   | -177.9(6)  |
| K(2)-O(130)-C(240)-C(230)     | -34.8(8)   |
| O(120)-C(230)-C(240)-O(130)   | 61.5(9)    |
| C(240)-O(130)-C(250)-C(260)   | 178.2(6)   |
| K(2)-O(130)-C(250)-C(260)     | 35.5(7)    |
| C(260)#1-O(140)-C(260)-C(250) | -172.9(4)  |
| K(2)-O(140)-C(260)-C(250)     | 63.2(7)    |
| O(130)-C(250)-C(260)-O(140)   | -66.0(8)   |
| C(8X)#1-O(150)-C(8X)-C(7X)    | -143.1(10) |
| K(2)-O(150)-C(8X)-C(7X)       | 0(3)       |
| C(6Y)-O(160)-C(7Y)-C(8Y)      | 162.0(15)  |
| K(2)-O(160)-C(7Y)-C(8Y)       | 22.3(19)   |
| C(7X)-O(160)-C(6X)-C(5X)      | -164.2(14) |
| K(2)-O(160)-C(6X)-C(5X)       | -31.3(17)  |
| C(6Y)-C(5Y)-O(170)-C(5Y)#1    | 145.0(11)  |
| C(6Y)-C(5Y)-O(170)-K(2)       | 8(2)       |
| C(310)#1-O(180)-C(310)-C(320) | -123.0(17) |
| K(3)-O(180)-C(310)-C(320)     | 33(2)      |
| O(180)-C(310)-C(320)-O(190)   | -29(3)     |
| C(330)-O(190)-C(320)-C(310)   | -171.8(16) |
| K(3)-O(190)-C(320)-C(310)     | 6(2)       |
| C(320)-O(190)-C(330)-C(340)   | 179.9(15)  |
| K(3)-O(190)-C(330)-C(340)     | 1.8(17)    |
| C(380)-O(220)-C(370)-C(370)#1 | -124.5(8)  |
| K(3)-O(220)-C(370)-C(370)#1   | 13.0(9)    |
| C(370)-O(220)-C(380)-C(390)   | 119.9(16)  |
| K(3)-O(220)-C(380)-C(390)     | -18(2)     |

|                               |            |
|-------------------------------|------------|
| O(220)-C(380)-C(390)-O(230)   | 0(3)       |
| C(400)-O(230)-C(390)-C(380)   | -122.8(16) |
| K(3)-O(230)-C(390)-C(380)     | 18.3(19)   |
| C(2X)-O(1X)-C(3X)-C(4X)       | 178.5(9)   |
| C(3X)-O(1X)-C(2X)-C(1X)       | -176.1(9)  |
| C(390)-O(230)-C(400)-C(400)#1 | 124.0(8)   |
| K(3)-O(230)-C(400)-C(400)#1   | -17.8(9)   |
| C(350)-C(360)-O(210)-C(360)#1 | 173.3(10)  |
| C(350)-C(360)-O(210)-K(3)     | 34(2)      |
| C(350)-O(200)-C(340)-C(330)   | 172.4(18)  |
| K(3)-O(200)-C(340)-C(330)     | -2(3)      |
| O(190)-C(330)-C(340)-O(200)   | 0(3)       |
| O(210)-C(360)-C(350)-O(200)   | -54(3)     |
| C(340)-O(200)-C(350)-C(360)   | -127(2)    |
| K(3)-O(200)-C(350)-C(360)     | 47(2)      |
| O(160)-C(6X)-C(5X)-O(170)     | 63(3)      |
| C(5X)#1-O(170)-C(5X)-C(6X)    | 62(4)      |
| K(2)-O(170)-C(5X)-C(6X)       | -60(3)     |
| O(170)-C(5Y)-C(6Y)-O(160)     | -45(3)     |
| C(7Y)-O(160)-C(6Y)-C(5Y)      | -89(2)     |
| K(2)-O(160)-C(6Y)-C(5Y)       | 59(2)      |
| O(150)-C(8X)-C(7X)-O(160)     | 39(3)      |
| C(6X)-O(160)-C(7X)-C(8X)      | 87(2)      |
| K(2)-O(160)-C(7X)-C(8X)       | -56(2)     |
| O(160)-C(7Y)-C(8Y)-O(150)     | -56(3)     |
| C(8Y)#1-O(150)-C(8Y)-C(7Y)    | -67(4)     |
| K(2)-O(150)-C(8Y)-C(7Y)       | 56(3)      |

---

Symmetry transformations used to generate equivalent atoms:  
 #1 x,-y+1/2,z

**L<sup>Me</sup>Fe(OCPh<sub>2</sub>CHCPh) (6)**. Low-temperature diffraction data ( $\omega$ -scans) were collected on a Rigaku MicroMax-007HF diffractometer coupled to a Saturn994+ CCD detector with Cu K $\alpha$  ( $\lambda = 1.54178 \text{ \AA}$ ) for the structure of **6**. The diffraction images were processed and scaled using Rigaku Oxford Diffraction software (CrysAlisPro; Rigaku OD: The Woodlands, TX, 2015). The structure was solved with SHELXT and was refined against  $F^2$  on all data by full-matrix least squares with SHELXL (Sheldrick, G. M. Acta Cryst. 2008, A64, 112–122). All non-hydrogen atoms were refined anisotropically. Hydrogen atoms were included in the model at geometrically calculated positions and refined using a riding model. The isotropic displacement parameters of all hydrogen atoms were fixed to 1.2 times the U value of the atoms to which they are linked (1.5 times for methyl groups).

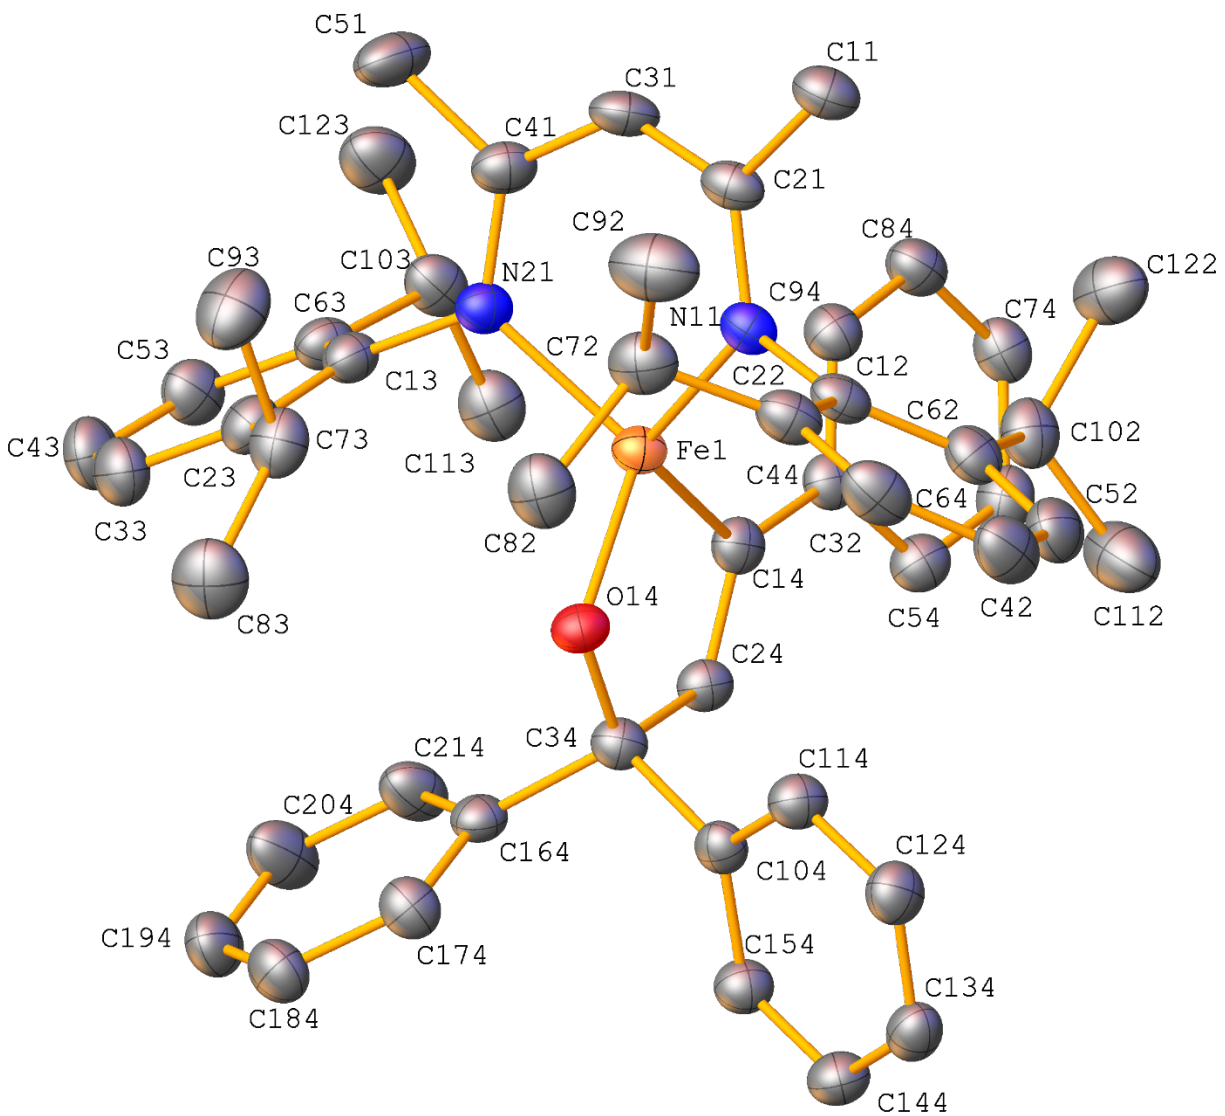

**Figure S-28:** The complete numbering scheme of  $L^{Me}Fe(OCPh_2CHCPh)$  (6) with 50% thermal ellipsoid probability levels. The hydrogen atoms are omitted for clarity.

Table S-24. Crystal data and structure refinement for **6**.

|                                   |                                                     |                             |
|-----------------------------------|-----------------------------------------------------|-----------------------------|
| Identification code               | 007b-18035                                          |                             |
| CSD Deposition Number             | 1944812                                             |                             |
| Empirical formula                 | C <sub>50</sub> H <sub>57</sub> Fe N <sub>2</sub> O |                             |
| Formula weight                    | 757.82                                              |                             |
| Temperature                       | 93(2) K                                             |                             |
| Wavelength                        | 1.54184 Å                                           |                             |
| Crystal system                    | Monoclinic                                          |                             |
| Space group                       | P2 <sub>1</sub>                                     |                             |
| Unit cell dimensions              | $a = 13.1153(3)$ Å                                  | $\alpha = 90^\circ$ .       |
|                                   | $b = 11.5562(3)$ Å                                  | $\beta = 97.040(2)^\circ$ . |
|                                   | $c = 14.0967(4)$ Å                                  | $\gamma = 90^\circ$ .       |
| Volume                            | 2120.43(10) Å <sup>3</sup>                          |                             |
| Z                                 | 2                                                   |                             |
| Density (calculated)              | 1.187 g/cm <sup>3</sup>                             |                             |
| Absorption coefficient            | 3.130 mm <sup>-1</sup>                              |                             |
| F(000)                            | 810                                                 |                             |
| Crystal size                      | 0.200 x 0.200 x 0.030 mm <sup>3</sup>               |                             |
| Crystal color and habit           | Green Plate                                         |                             |
| Diffractometer                    | Rigaku Saturn 944+ CCD                              |                             |
| Theta range for data collection   | 3.159 to 66.600°.                                   |                             |
| Index ranges                      | -15 ≤ h ≤ 15, -13 ≤ k ≤ 13, -16 ≤ l ≤ 16            |                             |
| Reflections collected             | 76162                                               |                             |
| Independent reflections           | 7495 [R(int) = 0.0861]                              |                             |
| Observed reflections (I > 2σ(I))  | 6924                                                |                             |
| Completeness to theta = 66.600°   | 100.0 %                                             |                             |
| Absorption correction             | Semi-empirical from equivalents                     |                             |
| Max. and min. transmission        | 1.00000 and 0.86231                                 |                             |
| Solution method                   | SHELXT-2014/5 (Sheldrick, 2014)                     |                             |
| Refinement method                 | SHELXL-2014/7 (Sheldrick, 2014)                     |                             |
| Data / restraints / parameters    | 7495 / 1 / 497                                      |                             |
| Goodness-of-fit on F <sup>2</sup> | 1.027                                               |                             |
| Final R indices [I > 2σ(I)]       | R1 = 0.0344, wR2 = 0.0799                           |                             |
| R indices (all data)              | R1 = 0.0396, wR2 = 0.0827                           |                             |
| Absolute structure parameter      | -0.007(2)                                           |                             |
| Largest diff. peak and hole       | 0.353 and -0.252 e.Å <sup>-3</sup>                  |                             |

Table S-25. Atomic coordinates ( $\times 10^4$ ) and equivalent isotropic displacement parameters ( $\text{\AA}^2 \times 10^3$ ) for **6**.  $U(\text{eq})$  is defined as one third of the trace of the orthogonalized  $U^{ij}$  tensor.

|        | x        | y       | z        | U(eq) |
|--------|----------|---------|----------|-------|
| Fe(01) | 7500(1)  | 5547(1) | 7097(1)  | 24(1) |
| N(11)  | 8237(2)  | 7054(2) | 7193(2)  | 26(1) |
| N(21)  | 6160(2)  | 6169(2) | 7384(2)  | 27(1) |
| C(11)  | 8287(3)  | 9187(3) | 7072(3)  | 34(1) |
| C(21)  | 7724(3)  | 8054(3) | 7096(2)  | 27(1) |
| C(31)  | 6649(3)  | 8129(3) | 7065(3)  | 33(1) |
| C(41)  | 5937(3)  | 7298(3) | 7267(3)  | 31(1) |
| C(51)  | 4869(3)  | 7727(4) | 7371(3)  | 45(1) |
| C(12)  | 9344(2)  | 7049(3) | 7425(2)  | 27(1) |
| C(22)  | 9763(3)  | 7273(3) | 8377(2)  | 32(1) |
| C(32)  | 10831(3) | 7195(3) | 8597(3)  | 38(1) |
| C(42)  | 11455(3) | 6894(4) | 7921(3)  | 41(1) |
| C(52)  | 11025(3) | 6675(3) | 6990(3)  | 39(1) |
| C(62)  | 9968(3)  | 6746(3) | 6724(2)  | 31(1) |
| C(72)  | 9104(3)  | 7552(3) | 9159(2)  | 36(1) |
| C(82)  | 9127(3)  | 6535(4) | 9861(3)  | 42(1) |
| C(92)  | 9437(4)  | 8684(4) | 9676(3)  | 51(1) |
| C(102) | 9514(3)  | 6518(3) | 5694(3)  | 36(1) |
| C(112) | 10111(3) | 5628(4) | 5195(3)  | 52(1) |
| C(122) | 9398(3)  | 7641(4) | 5118(3)  | 45(1) |
| C(13)  | 5411(2)  | 5378(3) | 7684(2)  | 27(1) |
| C(23)  | 5528(3)  | 5005(3) | 8638(2)  | 31(1) |
| C(33)  | 4806(3)  | 4250(3) | 8932(3)  | 38(1) |
| C(43)  | 3983(3)  | 3867(4) | 8300(3)  | 40(1) |
| C(53)  | 3897(3)  | 4203(3) | 7356(3)  | 36(1) |
| C(63)  | 4604(2)  | 4955(3) | 7021(2)  | 30(1) |
| C(73)  | 6417(2)  | 5442(4) | 9357(2)  | 35(1) |
| C(83)  | 6784(3)  | 4545(4) | 10128(3) | 49(1) |
| C(93)  | 6143(3)  | 6586(4) | 9810(3)  | 51(1) |
| C(103) | 4504(3)  | 5240(3) | 5957(2)  | 34(1) |
| C(113) | 4724(3)  | 4167(4) | 5379(3)  | 40(1) |
| C(123) | 3436(3)  | 5736(4) | 5580(3)  | 47(1) |



|        |          |         |         |       |
|--------|----------|---------|---------|-------|
| O(14)  | 8047(2)  | 4367(2) | 7879(2) | 26(1) |
| C(14)  | 7541(2)  | 4500(3) | 5945(2) | 27(1) |
| C(24)  | 7868(2)  | 3476(3) | 6310(2) | 26(1) |
| C(34)  | 8193(2)  | 3315(3) | 7388(2) | 26(1) |
| C(44)  | 7293(2)  | 4762(3) | 4915(2) | 26(1) |
| C(54)  | 7595(3)  | 4057(3) | 4187(2) | 31(1) |
| C(64)  | 7355(3)  | 4342(3) | 3233(2) | 33(1) |
| C(74)  | 6804(2)  | 5342(3) | 2974(2) | 32(1) |
| C(84)  | 6515(3)  | 6064(3) | 3677(3) | 33(1) |
| C(94)  | 6768(2)  | 5780(3) | 4630(2) | 30(1) |
| C(104) | 9345(2)  | 3008(3) | 7494(2) | 26(1) |
| C(114) | 10086(3) | 3860(3) | 7732(2) | 30(1) |
| C(124) | 11123(3) | 3592(3) | 7779(3) | 34(1) |
| C(134) | 11433(3) | 2474(3) | 7615(2) | 32(1) |
| C(144) | 10705(3) | 1624(3) | 7384(2) | 33(1) |
| C(154) | 9670(3)  | 1893(3) | 7316(2) | 30(1) |
| C(164) | 7561(2)  | 2385(3) | 7832(2) | 27(1) |
| C(174) | 7925(3)  | 1927(3) | 8715(2) | 32(1) |
| C(184) | 7352(3)  | 1135(3) | 9171(3) | 37(1) |
| C(194) | 6395(3)  | 790(3)  | 8738(3) | 40(1) |
| C(204) | 6029(3)  | 1246(4) | 7858(3) | 46(1) |
| C(214) | 6601(3)  | 2043(3) | 7408(3) | 39(1) |

---

Table S-26. Bond lengths [Å] and angles [°] for **6**.

---

|              |          |
|--------------|----------|
| Fe(01)-O(14) | 1.843(2) |
| Fe(01)-N(21) | 1.986(3) |
| Fe(01)-N(11) | 1.988(3) |
| Fe(01)-C(14) | 2.031(3) |
| N(11)-C(21)  | 1.336(4) |
| N(11)-C(12)  | 1.449(4) |
| N(21)-C(41)  | 1.342(4) |
| N(21)-C(13)  | 1.443(4) |
| C(11)-C(21)  | 1.505(5) |
| C(11)-H(11A) | 0.9800   |
| C(11)-H(11B) | 0.9800   |
| C(11)-H(11C) | 0.9800   |
| C(21)-C(31)  | 1.408(5) |
| C(31)-C(41)  | 1.393(5) |
| C(31)-H(31)  | 0.9500   |
| C(41)-C(51)  | 1.509(5) |
| C(51)-H(51A) | 0.9800   |
| C(51)-H(51B) | 0.9800   |
| C(51)-H(51C) | 0.9800   |
| C(12)-C(62)  | 1.402(5) |
| C(12)-C(22)  | 1.410(5) |
| C(22)-C(32)  | 1.400(5) |
| C(22)-C(72)  | 1.516(5) |
| C(32)-C(42)  | 1.375(6) |
| C(32)-H(32)  | 0.9500   |
| C(42)-C(52)  | 1.386(6) |
| C(42)-H(42)  | 0.9500   |
| C(52)-C(62)  | 1.393(5) |
| C(52)-H(52)  | 0.9500   |
| C(62)-C(102) | 1.523(5) |
| C(72)-C(82)  | 1.534(5) |
| C(72)-C(92)  | 1.535(6) |
| C(72)-H(72)  | 1.0000   |
| C(82)-H(82A) | 0.9800   |
| C(82)-H(82B) | 0.9800   |

|               |          |
|---------------|----------|
| C(82)-H(82C)  | 0.9800   |
| C(92)-H(92A)  | 0.9800   |
| C(92)-H(92B)  | 0.9800   |
| C(92)-H(92C)  | 0.9800   |
| C(102)-C(112) | 1.517(6) |
| C(102)-C(122) | 1.529(6) |
| C(102)-H(102) | 1.0000   |
| C(112)-H(11D) | 0.9800   |
| C(112)-H(11E) | 0.9800   |
| C(112)-H(11F) | 0.9800   |
| C(122)-H(12A) | 0.9800   |
| C(122)-H(12B) | 0.9800   |
| C(122)-H(12C) | 0.9800   |
| C(13)-C(23)   | 1.404(5) |
| C(13)-C(63)   | 1.411(5) |
| C(23)-C(33)   | 1.387(5) |
| C(23)-C(73)   | 1.534(5) |
| C(33)-C(43)   | 1.385(5) |
| C(33)-H(33)   | 0.9500   |
| C(43)-C(53)   | 1.378(5) |
| C(43)-H(43)   | 0.9500   |
| C(53)-C(63)   | 1.394(5) |
| C(53)-H(53)   | 0.9500   |
| C(63)-C(103)  | 1.525(5) |
| C(73)-C(93)   | 1.529(6) |
| C(73)-C(83)   | 1.536(6) |
| C(73)-H(73)   | 1.0000   |
| C(83)-H(83A)  | 0.9800   |
| C(83)-H(83B)  | 0.9800   |
| C(83)-H(83C)  | 0.9800   |
| C(93)-H(93A)  | 0.9800   |
| C(93)-H(93B)  | 0.9800   |
| C(93)-H(93C)  | 0.9800   |
| C(103)-C(113) | 1.531(5) |
| C(103)-C(123) | 1.545(5) |
| C(103)-H(103) | 1.0000   |
| C(113)-H(11G) | 0.9800   |

|               |          |
|---------------|----------|
| C(113)-H(11H) | 0.9800   |
| C(113)-H(11I) | 0.9800   |
| C(123)-H(12D) | 0.9800   |
| C(123)-H(12E) | 0.9800   |
| C(123)-H(12F) | 0.9800   |
| O(14)-C(34)   | 1.423(4) |
| C(14)-C(24)   | 1.341(5) |
| C(14)-C(44)   | 1.479(5) |
| C(24)-C(34)   | 1.538(4) |
| C(24)-H(24)   | 0.9500   |
| C(34)-C(164)  | 1.536(5) |
| C(34)-C(104)  | 1.542(4) |
| C(44)-C(94)   | 1.397(5) |
| C(44)-C(54)   | 1.405(5) |
| C(54)-C(64)   | 1.383(5) |
| C(54)-H(54)   | 0.9500   |
| C(64)-C(74)   | 1.387(5) |
| C(64)-H(64)   | 0.9500   |
| C(74)-C(84)   | 1.384(5) |
| C(74)-H(74)   | 0.9500   |
| C(84)-C(94)   | 1.382(5) |
| C(84)-H(84)   | 0.9500   |
| C(94)-H(94)   | 0.9500   |
| C(104)-C(154) | 1.389(5) |
| C(104)-C(114) | 1.395(5) |
| C(114)-C(124) | 1.388(5) |
| C(114)-H(114) | 0.9500   |
| C(124)-C(134) | 1.383(5) |
| C(124)-H(124) | 0.9500   |
| C(134)-C(144) | 1.380(5) |
| C(134)-H(134) | 0.9500   |
| C(144)-C(154) | 1.385(5) |
| C(144)-H(144) | 0.9500   |
| C(154)-H(154) | 0.9500   |
| C(164)-C(174) | 1.383(5) |
| C(164)-C(214) | 1.384(5) |
| C(174)-C(184) | 1.391(5) |

|               |          |
|---------------|----------|
| C(174)-H(174) | 0.9500   |
| C(184)-C(194) | 1.385(5) |
| C(184)-H(184) | 0.9500   |
| C(194)-C(204) | 1.379(6) |
| C(194)-H(194) | 0.9500   |
| C(204)-C(214) | 1.388(5) |
| C(204)-H(204) | 0.9500   |
| C(214)-H(214) | 0.9500   |

|                     |            |
|---------------------|------------|
| O(14)-Fe(01)-N(21)  | 115.80(11) |
| O(14)-Fe(01)-N(11)  | 117.21(10) |
| N(21)-Fe(01)-N(11)  | 95.94(11)  |
| O(14)-Fe(01)-C(14)  | 89.50(12)  |
| N(21)-Fe(01)-C(14)  | 119.27(12) |
| N(11)-Fe(01)-C(14)  | 121.11(12) |
| C(21)-N(11)-C(12)   | 120.3(3)   |
| C(21)-N(11)-Fe(01)  | 121.1(2)   |
| C(12)-N(11)-Fe(01)  | 118.5(2)   |
| C(41)-N(21)-C(13)   | 120.3(3)   |
| C(41)-N(21)-Fe(01)  | 120.8(2)   |
| C(13)-N(21)-Fe(01)  | 118.8(2)   |
| C(21)-C(11)-H(11A)  | 109.5      |
| C(21)-C(11)-H(11B)  | 109.5      |
| H(11A)-C(11)-H(11B) | 109.5      |
| C(21)-C(11)-H(11C)  | 109.5      |
| H(11A)-C(11)-H(11C) | 109.5      |
| H(11B)-C(11)-H(11C) | 109.5      |
| N(11)-C(21)-C(31)   | 123.1(3)   |
| N(11)-C(21)-C(11)   | 120.8(3)   |
| C(31)-C(21)-C(11)   | 116.0(3)   |
| C(41)-C(31)-C(21)   | 130.2(3)   |
| C(41)-C(31)-H(31)   | 114.9      |
| C(21)-C(31)-H(31)   | 114.9      |
| N(21)-C(41)-C(31)   | 123.6(3)   |
| N(21)-C(41)-C(51)   | 119.9(3)   |
| C(31)-C(41)-C(51)   | 116.5(3)   |
| C(41)-C(51)-H(51A)  | 109.5      |

|                     |          |
|---------------------|----------|
| C(41)-C(51)-H(51B)  | 109.5    |
| H(51A)-C(51)-H(51B) | 109.5    |
| C(41)-C(51)-H(51C)  | 109.5    |
| H(51A)-C(51)-H(51C) | 109.5    |
| H(51B)-C(51)-H(51C) | 109.5    |
| C(62)-C(12)-C(22)   | 121.6(3) |
| C(62)-C(12)-N(11)   | 119.9(3) |
| C(22)-C(12)-N(11)   | 118.4(3) |
| C(32)-C(22)-C(12)   | 117.5(3) |
| C(32)-C(22)-C(72)   | 119.7(3) |
| C(12)-C(22)-C(72)   | 122.7(3) |
| C(42)-C(32)-C(22)   | 121.8(3) |
| C(42)-C(32)-H(32)   | 119.1    |
| C(22)-C(32)-H(32)   | 119.1    |
| C(32)-C(42)-C(52)   | 119.7(3) |
| C(32)-C(42)-H(42)   | 120.2    |
| C(52)-C(42)-H(42)   | 120.2    |
| C(42)-C(52)-C(62)   | 121.3(3) |
| C(42)-C(52)-H(52)   | 119.3    |
| C(62)-C(52)-H(52)   | 119.3    |
| C(52)-C(62)-C(12)   | 118.2(3) |
| C(52)-C(62)-C(102)  | 120.4(3) |
| C(12)-C(62)-C(102)  | 121.4(3) |
| C(22)-C(72)-C(82)   | 109.8(3) |
| C(22)-C(72)-C(92)   | 111.9(3) |
| C(82)-C(72)-C(92)   | 111.4(3) |
| C(22)-C(72)-H(72)   | 107.9    |
| C(82)-C(72)-H(72)   | 107.9    |
| C(92)-C(72)-H(72)   | 107.9    |
| C(72)-C(82)-H(82A)  | 109.5    |
| C(72)-C(82)-H(82B)  | 109.5    |
| H(82A)-C(82)-H(82B) | 109.5    |
| C(72)-C(82)-H(82C)  | 109.5    |
| H(82A)-C(82)-H(82C) | 109.5    |
| H(82B)-C(82)-H(82C) | 109.5    |
| C(72)-C(92)-H(92A)  | 109.5    |
| C(72)-C(92)-H(92B)  | 109.5    |

|                      |          |
|----------------------|----------|
| H(92A)-C(92)-H(92B)  | 109.5    |
| C(72)-C(92)-H(92C)   | 109.5    |
| H(92A)-C(92)-H(92C)  | 109.5    |
| H(92B)-C(92)-H(92C)  | 109.5    |
| C(112)-C(102)-C(62)  | 113.3(3) |
| C(112)-C(102)-C(122) | 110.6(3) |
| C(62)-C(102)-C(122)  | 111.2(3) |
| C(112)-C(102)-H(102) | 107.1    |
| C(62)-C(102)-H(102)  | 107.1    |
| C(122)-C(102)-H(102) | 107.1    |
| C(102)-C(112)-H(11D) | 109.5    |
| C(102)-C(112)-H(11E) | 109.5    |
| H(11D)-C(112)-H(11E) | 109.5    |
| C(102)-C(112)-H(11F) | 109.5    |
| H(11D)-C(112)-H(11F) | 109.5    |
| H(11E)-C(112)-H(11F) | 109.5    |
| C(102)-C(122)-H(12A) | 109.5    |
| C(102)-C(122)-H(12B) | 109.5    |
| H(12A)-C(122)-H(12B) | 109.5    |
| C(102)-C(122)-H(12C) | 109.5    |
| H(12A)-C(122)-H(12C) | 109.5    |
| H(12B)-C(122)-H(12C) | 109.5    |
| C(23)-C(13)-C(63)    | 120.9(3) |
| C(23)-C(13)-N(21)    | 118.5(3) |
| C(63)-C(13)-N(21)    | 120.6(3) |
| C(33)-C(23)-C(13)    | 118.7(3) |
| C(33)-C(23)-C(73)    | 120.1(3) |
| C(13)-C(23)-C(73)    | 121.1(3) |
| C(43)-C(33)-C(23)    | 121.1(3) |
| C(43)-C(33)-H(33)    | 119.5    |
| C(23)-C(33)-H(33)    | 119.5    |
| C(53)-C(43)-C(33)    | 119.8(3) |
| C(53)-C(43)-H(43)    | 120.1    |
| C(33)-C(43)-H(43)    | 120.1    |
| C(43)-C(53)-C(63)    | 121.6(3) |
| C(43)-C(53)-H(53)    | 119.2    |
| C(63)-C(53)-H(53)    | 119.2    |

|                      |          |
|----------------------|----------|
| C(53)-C(63)-C(13)    | 117.9(3) |
| C(53)-C(63)-C(103)   | 119.2(3) |
| C(13)-C(63)-C(103)   | 122.9(3) |
| C(93)-C(73)-C(23)    | 111.2(3) |
| C(93)-C(73)-C(83)    | 111.0(3) |
| C(23)-C(73)-C(83)    | 113.1(3) |
| C(93)-C(73)-H(73)    | 107.1    |
| C(23)-C(73)-H(73)    | 107.1    |
| C(83)-C(73)-H(73)    | 107.1    |
| C(73)-C(83)-H(83A)   | 109.5    |
| C(73)-C(83)-H(83B)   | 109.5    |
| H(83A)-C(83)-H(83B)  | 109.5    |
| C(73)-C(83)-H(83C)   | 109.5    |
| H(83A)-C(83)-H(83C)  | 109.5    |
| H(83B)-C(83)-H(83C)  | 109.5    |
| C(73)-C(93)-H(93A)   | 109.5    |
| C(73)-C(93)-H(93B)   | 109.5    |
| H(93A)-C(93)-H(93B)  | 109.5    |
| C(73)-C(93)-H(93C)   | 109.5    |
| H(93A)-C(93)-H(93C)  | 109.5    |
| H(93B)-C(93)-H(93C)  | 109.5    |
| C(63)-C(103)-C(113)  | 110.4(3) |
| C(63)-C(103)-C(123)  | 112.6(3) |
| C(113)-C(103)-C(123) | 109.8(3) |
| C(63)-C(103)-H(103)  | 108.0    |
| C(113)-C(103)-H(103) | 108.0    |
| C(123)-C(103)-H(103) | 108.0    |
| C(103)-C(113)-H(11G) | 109.5    |
| C(103)-C(113)-H(11H) | 109.5    |
| H(11G)-C(113)-H(11H) | 109.5    |
| C(103)-C(113)-H(11I) | 109.5    |
| H(11G)-C(113)-H(11I) | 109.5    |
| H(11H)-C(113)-H(11I) | 109.5    |
| C(103)-C(123)-H(12D) | 109.5    |
| C(103)-C(123)-H(12E) | 109.5    |
| H(12D)-C(123)-H(12E) | 109.5    |
| C(103)-C(123)-H(12F) | 109.5    |



|                      |            |
|----------------------|------------|
| H(12D)-C(123)-H(12F) | 109.5      |
| H(12E)-C(123)-H(12F) | 109.5      |
| C(34)-O(14)-Fe(01)   | 114.01(19) |
| C(24)-C(14)-C(44)    | 125.4(3)   |
| C(24)-C(14)-Fe(01)   | 104.9(2)   |
| C(44)-C(14)-Fe(01)   | 129.7(2)   |
| C(14)-C(24)-C(34)    | 121.5(3)   |
| C(14)-C(24)-H(24)    | 119.2      |
| C(34)-C(24)-H(24)    | 119.2      |
| O(14)-C(34)-C(164)   | 106.7(2)   |
| O(14)-C(34)-C(24)    | 109.9(3)   |
| C(164)-C(34)-C(24)   | 112.9(3)   |
| O(14)-C(34)-C(104)   | 109.8(3)   |
| C(164)-C(34)-C(104)  | 111.8(3)   |
| C(24)-C(34)-C(104)   | 105.9(2)   |
| C(94)-C(44)-C(54)    | 116.8(3)   |
| C(94)-C(44)-C(14)    | 119.7(3)   |
| C(54)-C(44)-C(14)    | 123.4(3)   |
| C(64)-C(54)-C(44)    | 121.5(3)   |
| C(64)-C(54)-H(54)    | 119.3      |
| C(44)-C(54)-H(54)    | 119.3      |
| C(54)-C(64)-C(74)    | 120.2(3)   |
| C(54)-C(64)-H(64)    | 119.9      |
| C(74)-C(64)-H(64)    | 119.9      |
| C(84)-C(74)-C(64)    | 119.5(3)   |
| C(84)-C(74)-H(74)    | 120.2      |
| C(64)-C(74)-H(74)    | 120.2      |
| C(94)-C(84)-C(74)    | 119.9(3)   |
| C(94)-C(84)-H(84)    | 120.0      |
| C(74)-C(84)-H(84)    | 120.0      |
| C(84)-C(94)-C(44)    | 122.0(3)   |
| C(84)-C(94)-H(94)    | 119.0      |
| C(44)-C(94)-H(94)    | 119.0      |
| C(154)-C(104)-C(114) | 118.6(3)   |
| C(154)-C(104)-C(34)  | 121.0(3)   |
| C(114)-C(104)-C(34)  | 120.4(3)   |
| C(124)-C(114)-C(104) | 120.2(3)   |

|                      |          |
|----------------------|----------|
| C(124)-C(114)-H(114) | 119.9    |
| C(104)-C(114)-H(114) | 119.9    |
| C(134)-C(124)-C(114) | 120.5(3) |
| C(134)-C(124)-H(124) | 119.8    |
| C(114)-C(124)-H(124) | 119.8    |
| C(144)-C(134)-C(124) | 119.7(3) |
| C(144)-C(134)-H(134) | 120.2    |
| C(124)-C(134)-H(134) | 120.2    |
| C(134)-C(144)-C(154) | 120.0(3) |
| C(134)-C(144)-H(144) | 120.0    |
| C(154)-C(144)-H(144) | 120.0    |
| C(144)-C(154)-C(104) | 121.0(3) |
| C(144)-C(154)-H(154) | 119.5    |
| C(104)-C(154)-H(154) | 119.5    |
| C(174)-C(164)-C(214) | 118.3(3) |
| C(174)-C(164)-C(34)  | 119.4(3) |
| C(214)-C(164)-C(34)  | 122.2(3) |
| C(164)-C(174)-C(184) | 121.4(3) |
| C(164)-C(174)-H(174) | 119.3    |
| C(184)-C(174)-H(174) | 119.3    |
| C(194)-C(184)-C(174) | 119.8(3) |
| C(194)-C(184)-H(184) | 120.1    |
| C(174)-C(184)-H(184) | 120.1    |
| C(204)-C(194)-C(184) | 118.9(3) |
| C(204)-C(194)-H(194) | 120.5    |
| C(184)-C(194)-H(194) | 120.5    |
| C(194)-C(204)-C(214) | 121.1(3) |
| C(194)-C(204)-H(204) | 119.5    |
| C(214)-C(204)-H(204) | 119.5    |
| C(164)-C(214)-C(204) | 120.5(3) |
| C(164)-C(214)-H(214) | 119.8    |
| C(204)-C(214)-H(214) | 119.8    |

---

Table S-27. Anisotropic displacement parameters ( $\text{\AA}^2 \times 10^3$ ) for **6**. The anisotropic displacement factor exponent takes the form:  $-2\pi^2 [ h^2 a^{*2} U^{11} + \dots + 2 h k a^* b^* U^{12} ]$

|        | U <sup>11</sup> | U <sup>22</sup> | U <sup>33</sup> | U <sup>23</sup> | U <sup>13</sup> | U <sup>12</sup> |
|--------|-----------------|-----------------|-----------------|-----------------|-----------------|-----------------|
| Fe(01) | 24(1)           | 21(1)           | 26(1)           | -1(1)           | 0(1)            | -1(1)           |
| N(11)  | 28(1)           | 24(2)           | 23(1)           | 1(1)            | -2(1)           | -2(1)           |
| N(21)  | 26(1)           | 25(2)           | 31(2)           | 0(1)            | 0(1)            | 1(1)            |
| C(11)  | 39(2)           | 25(2)           | 36(2)           | 3(2)            | -2(2)           | -1(2)           |
| C(21)  | 36(2)           | 22(2)           | 23(2)           | 0(1)            | -4(1)           | 0(1)            |
| C(31)  | 36(2)           | 22(2)           | 38(2)           | 4(1)            | -5(2)           | 5(1)            |
| C(41)  | 29(2)           | 28(2)           | 36(2)           | -1(1)           | -3(1)           | 3(1)            |
| C(51)  | 33(2)           | 33(2)           | 69(3)           | -3(2)           | 4(2)            | 8(2)            |
| C(12)  | 29(2)           | 20(2)           | 31(2)           | 3(1)            | -3(1)           | -4(1)           |
| C(22)  | 34(2)           | 27(2)           | 34(2)           | 4(1)            | -5(2)           | -2(1)           |
| C(32)  | 34(2)           | 39(2)           | 36(2)           | 7(2)            | -10(2)          | -7(2)           |
| C(42)  | 28(2)           | 44(2)           | 50(2)           | 9(2)            | -2(2)           | -6(2)           |
| C(52)  | 36(2)           | 37(2)           | 44(2)           | 5(2)            | 9(2)            | -5(2)           |
| C(62)  | 34(2)           | 26(2)           | 32(2)           | 1(2)            | 3(1)            | -7(2)           |
| C(72)  | 40(2)           | 40(2)           | 28(2)           | -2(2)           | -5(2)           | 2(2)            |
| C(82)  | 41(2)           | 52(3)           | 33(2)           | 1(2)            | -2(2)           | -5(2)           |
| C(92)  | 69(3)           | 43(2)           | 38(2)           | -7(2)           | -11(2)          | 5(2)            |
| C(102) | 37(2)           | 38(2)           | 34(2)           | -4(2)           | 5(2)            | -10(2)          |
| C(112) | 77(3)           | 40(2)           | 39(2)           | -1(2)           | 10(2)           | 0(2)            |
| C(122) | 53(2)           | 50(2)           | 33(2)           | -4(2)           | 1(2)            | 10(2)           |
| C(13)  | 24(2)           | 24(2)           | 34(2)           | -2(1)           | 3(1)            | 1(1)            |
| C(23)  | 29(2)           | 34(2)           | 31(2)           | -6(2)           | 4(1)            | 2(1)            |
| C(33)  | 40(2)           | 43(2)           | 32(2)           | 2(2)            | 8(2)            | -3(2)           |
| C(43)  | 35(2)           | 44(2)           | 44(2)           | 3(2)            | 9(2)            | -11(2)          |
| C(53)  | 28(2)           | 39(2)           | 41(2)           | 1(2)            | -1(2)           | -6(2)           |
| C(63)  | 24(2)           | 28(2)           | 37(2)           | -1(1)           | 0(1)            | 1(1)            |
| C(73)  | 33(2)           | 42(2)           | 30(2)           | -9(2)           | 4(1)            | -6(2)           |
| C(83)  | 49(2)           | 62(3)           | 33(2)           | -2(2)           | -7(2)           | -3(2)           |
| C(93)  | 50(2)           | 53(3)           | 50(2)           | -20(2)          | 9(2)            | -6(2)           |
| C(103) | 28(2)           | 37(2)           | 37(2)           | 5(2)            | -4(1)           | -4(1)           |
| C(113) | 39(2)           | 46(2)           | 32(2)           | 0(2)            | -3(2)           | -5(2)           |
| C(123) | 37(2)           | 50(3)           | 50(2)           | 10(2)           | -7(2)           | 2(2)            |

|        |       |       |       |       |       |       |
|--------|-------|-------|-------|-------|-------|-------|
| O(14)  | 27(1) | 23(1) | 27(1) | -4(1) | 0(1)  | 2(1)  |
| C(14)  | 22(2) | 28(2) | 28(2) | -2(1) | 1(1)  | -5(1) |
| C(24)  | 24(2) | 25(2) | 28(2) | -2(1) | 0(1)  | -1(1) |
| C(34)  | 26(2) | 24(2) | 26(2) | -2(1) | -1(1) | -2(1) |
| C(44)  | 25(2) | 26(2) | 28(2) | -2(1) | 1(1)  | -5(1) |
| C(54)  | 29(2) | 30(2) | 32(2) | -4(1) | 1(1)  | -1(1) |
| C(64)  | 32(2) | 38(2) | 28(2) | -7(2) | 3(1)  | -5(2) |
| C(74)  | 33(2) | 36(2) | 25(2) | 0(1)  | -1(1) | -8(2) |
| C(84)  | 32(2) | 32(2) | 35(2) | 5(2)  | 0(1)  | -2(2) |
| C(94)  | 32(2) | 28(2) | 29(2) | -2(1) | 3(1)  | -3(1) |
| C(104) | 27(2) | 28(2) | 22(2) | 3(1)  | 1(1)  | 0(1)  |
| C(114) | 28(2) | 28(2) | 33(2) | -1(1) | 1(1)  | -1(1) |
| C(124) | 29(2) | 35(2) | 37(2) | -1(2) | 3(2)  | -5(2) |
| C(134) | 28(2) | 38(2) | 31(2) | 2(2)  | 4(1)  | 4(2)  |
| C(144) | 34(2) | 29(2) | 36(2) | -2(2) | 4(2)  | 4(2)  |
| C(154) | 30(2) | 27(2) | 32(2) | -2(1) | 2(1)  | -1(1) |
| C(164) | 28(2) | 21(2) | 32(2) | -2(1) | 4(1)  | 2(1)  |
| C(174) | 33(2) | 32(2) | 29(2) | -2(2) | -1(1) | -5(2) |
| C(184) | 42(2) | 37(2) | 30(2) | 4(2)  | 4(2)  | -2(2) |
| C(194) | 34(2) | 38(2) | 49(2) | 7(2)  | 10(2) | -5(2) |
| C(204) | 28(2) | 44(2) | 63(3) | 13(2) | -5(2) | -9(2) |
| C(214) | 29(2) | 37(2) | 48(2) | 11(2) | -5(2) | -1(2) |

---

Table S-28. Hydrogen coordinates ( $\times 10^4$ ) and isotropic displacement parameters ( $\text{\AA}^2 \times 10^{-3}$ ) for **6**.

|        | x     | y    | z     | U(eq) |
|--------|-------|------|-------|-------|
| H(11A) | 8314  | 9566 | 7697  | 51    |
| H(11B) | 7926  | 9687 | 6580  | 51    |
| H(11C) | 8987  | 9044 | 6925  | 51    |
| H(31)  | 6364  | 8862 | 6877  | 39    |
| H(51A) | 4422  | 7606 | 6770  | 68    |
| H(51B) | 4897  | 8555 | 7525  | 68    |
| H(51C) | 4597  | 7301 | 7886  | 68    |
| H(32)  | 11133 | 7356 | 9231  | 45    |
| H(42)  | 12176 | 6835 | 8090  | 49    |
| H(52)  | 11459 | 6472 | 6524  | 47    |
| H(72)  | 8380  | 7650 | 8854  | 44    |
| H(82A) | 8856  | 5840 | 9520  | 64    |
| H(82B) | 8703  | 6721 | 10367 | 64    |
| H(82C) | 9836  | 6394 | 10145 | 64    |
| H(92A) | 10134 | 8596 | 10009 | 77    |
| H(92B) | 8963  | 8866 | 10141 | 77    |
| H(92C) | 9427  | 9313 | 9209  | 77    |
| H(102) | 8808  | 6199 | 5713  | 43    |
| H(11D) | 10772 | 5958 | 5076  | 78    |
| H(11E) | 9716  | 5410 | 4586  | 78    |
| H(11F) | 10231 | 4941 | 5601  | 78    |
| H(12A) | 8983  | 8192 | 5435  | 68    |
| H(12B) | 9057  | 7478 | 4473  | 68    |
| H(12C) | 10078 | 7974 | 5075  | 68    |
| H(33)  | 4877  | 3991 | 9576  | 46    |
| H(43)  | 3480  | 3375 | 8517  | 49    |
| H(53)  | 3343  | 3915 | 6923  | 43    |
| H(73)  | 7008  | 5600 | 8991  | 42    |
| H(83A) | 6251  | 4434 | 10550 | 73    |
| H(83B) | 7416  | 4821 | 10503 | 73    |
| H(83C) | 6919  | 3808 | 9823  | 73    |

|        |       |      |       |    |
|--------|-------|------|-------|----|
| H(93A) | 5985  | 7169 | 9308  | 77 |
| H(93B) | 6726  | 6849 | 10260 | 77 |
| H(93C) | 5543  | 6473 | 10151 | 77 |
| H(103) | 5031  | 5840 | 5859  | 41 |
| H(11G) | 5395  | 3846 | 5630  | 60 |
| H(11H) | 4730  | 4382 | 4707  | 60 |
| H(11I) | 4189  | 3586 | 5428  | 60 |
| H(12D) | 2911  | 5142 | 5624  | 70 |
| H(12E) | 3431  | 5971 | 4911  | 70 |
| H(12F) | 3290  | 6408 | 5965  | 70 |
| H(24)  | 7899  | 2834 | 5893  | 31 |
| H(54)  | 7973  | 3370 | 4354  | 37 |
| H(64)  | 7567  | 3852 | 2753  | 39 |
| H(74)  | 6626  | 5529 | 2318  | 38 |
| H(84)  | 6143  | 6753 | 3506  | 40 |
| H(94)  | 6579  | 6294 | 5105  | 36 |
| H(114) | 9880  | 4627 | 7861  | 36 |
| H(124) | 11623 | 4180 | 7926  | 41 |
| H(134) | 12143 | 2291 | 7661  | 39 |
| H(144) | 10915 | 854  | 7272  | 39 |
| H(154) | 9174  | 1306 | 7144  | 36 |
| H(174) | 8581  | 2159 | 9017  | 38 |
| H(184) | 7616  | 831  | 9778  | 44 |
| H(194) | 5998  | 248  | 9042  | 48 |
| H(204) | 5375  | 1011 | 7554  | 55 |
| H(214) | 6331  | 2355 | 6806  | 47 |

---

Table S-29. Torsion angles [°] for [L<sup>Mc</sup>Fe(OCPh<sub>2</sub>CHCPh)] (6).

---

|                           |           |
|---------------------------|-----------|
| C(12)-N(11)-C(21)-C(31)   | -166.8(3) |
| Fe(01)-N(11)-C(21)-C(31)  | 9.9(4)    |
| C(12)-N(11)-C(21)-C(11)   | 9.5(4)    |
| Fe(01)-N(11)-C(21)-C(11)  | -173.9(2) |
| N(11)-C(21)-C(31)-C(41)   | 11.1(6)   |
| C(11)-C(21)-C(31)-C(41)   | -165.3(4) |
| C(13)-N(21)-C(41)-C(31)   | 173.9(3)  |
| Fe(01)-N(21)-C(41)-C(31)  | -8.7(5)   |
| C(13)-N(21)-C(41)-C(51)   | -5.0(5)   |
| Fe(01)-N(21)-C(41)-C(51)  | 172.5(3)  |
| C(21)-C(31)-C(41)-N(21)   | -11.8(6)  |
| C(21)-C(31)-C(41)-C(51)   | 167.1(4)  |
| C(21)-N(11)-C(12)-C(62)   | -107.3(4) |
| Fe(01)-N(11)-C(12)-C(62)  | 76.0(3)   |
| C(21)-N(11)-C(12)-C(22)   | 77.2(4)   |
| Fe(01)-N(11)-C(12)-C(22)  | -99.5(3)  |
| C(62)-C(12)-C(22)-C(32)   | 0.8(5)    |
| N(11)-C(12)-C(22)-C(32)   | 176.2(3)  |
| C(62)-C(12)-C(22)-C(72)   | -177.3(3) |
| N(11)-C(12)-C(22)-C(72)   | -1.9(5)   |
| C(12)-C(22)-C(32)-C(42)   | -1.2(5)   |
| C(72)-C(22)-C(32)-C(42)   | 177.0(4)  |
| C(22)-C(32)-C(42)-C(52)   | 1.0(6)    |
| C(32)-C(42)-C(52)-C(62)   | -0.5(6)   |
| C(42)-C(52)-C(62)-C(12)   | 0.2(5)    |
| C(42)-C(52)-C(62)-C(102)  | 179.2(3)  |
| C(22)-C(12)-C(62)-C(52)   | -0.4(5)   |
| N(11)-C(12)-C(62)-C(52)   | -175.7(3) |
| C(22)-C(12)-C(62)-C(102)  | -179.4(3) |
| N(11)-C(12)-C(62)-C(102)  | 5.3(5)    |
| C(32)-C(22)-C(72)-C(82)   | -68.5(4)  |
| C(12)-C(22)-C(72)-C(82)   | 109.6(4)  |
| C(32)-C(22)-C(72)-C(92)   | 55.7(4)   |
| C(12)-C(22)-C(72)-C(92)   | -126.2(4) |
| C(52)-C(62)-C(102)-C(112) | 32.4(5)   |

|                           |           |
|---------------------------|-----------|
| C(12)-C(62)-C(102)-C(112) | -148.6(3) |
| C(52)-C(62)-C(102)-C(122) | -92.9(4)  |
| C(12)-C(62)-C(102)-C(122) | 86.1(4)   |
| C(41)-N(21)-C(13)-C(23)   | -103.1(4) |
| Fe(01)-N(21)-C(13)-C(23)  | 79.4(3)   |
| C(41)-N(21)-C(13)-C(63)   | 79.5(4)   |
| Fe(01)-N(21)-C(13)-C(63)  | -98.0(3)  |
| C(63)-C(13)-C(23)-C(33)   | -3.0(5)   |
| N(21)-C(13)-C(23)-C(33)   | 179.6(3)  |
| C(63)-C(13)-C(23)-C(73)   | 178.7(3)  |
| N(21)-C(13)-C(23)-C(73)   | 1.2(5)    |
| C(13)-C(23)-C(33)-C(43)   | 0.0(5)    |
| C(73)-C(23)-C(33)-C(43)   | 178.4(4)  |
| C(23)-C(33)-C(43)-C(53)   | 2.6(6)    |
| C(33)-C(43)-C(53)-C(63)   | -2.1(6)   |
| C(43)-C(53)-C(63)-C(13)   | -0.8(5)   |
| C(43)-C(53)-C(63)-C(103)  | 176.5(3)  |
| C(23)-C(13)-C(63)-C(53)   | 3.3(5)    |
| N(21)-C(13)-C(63)-C(53)   | -179.3(3) |
| C(23)-C(13)-C(63)-C(103)  | -173.9(3) |
| N(21)-C(13)-C(63)-C(103)  | 3.5(5)    |
| C(33)-C(23)-C(73)-C(93)   | -92.4(4)  |
| C(13)-C(23)-C(73)-C(93)   | 85.9(4)   |
| C(33)-C(23)-C(73)-C(83)   | 33.2(5)   |
| C(13)-C(23)-C(73)-C(83)   | -148.5(3) |
| C(53)-C(63)-C(103)-C(113) | -67.1(4)  |
| C(13)-C(63)-C(103)-C(113) | 110.0(4)  |
| C(53)-C(63)-C(103)-C(123) | 56.0(4)   |
| C(13)-C(63)-C(103)-C(123) | -126.9(4) |
| N(21)-Fe(01)-O(14)-C(34)  | 119.6(2)  |
| N(11)-Fe(01)-O(14)-C(34)  | -128.2(2) |
| C(14)-Fe(01)-O(14)-C(34)  | -3.0(2)   |
| C(44)-C(14)-C(24)-C(34)   | 174.8(3)  |
| Fe(01)-C(14)-C(24)-C(34)  | -4.3(4)   |
| Fe(01)-O(14)-C(34)-C(164) | -121.3(2) |
| Fe(01)-O(14)-C(34)-C(24)  | 1.4(3)    |
| Fe(01)-O(14)-C(34)-C(104) | 117.4(2)  |



|                             |           |
|-----------------------------|-----------|
| C(14)-C(24)-C(34)-O(14)     | 2.3(4)    |
| C(14)-C(24)-C(34)-C(164)    | 121.3(3)  |
| C(14)-C(24)-C(34)-C(104)    | -116.2(3) |
| C(24)-C(14)-C(44)-C(94)     | 167.2(3)  |
| Fe(01)-C(14)-C(44)-C(94)    | -14.0(4)  |
| C(24)-C(14)-C(44)-C(54)     | -15.5(5)  |
| Fe(01)-C(14)-C(44)-C(54)    | 163.3(3)  |
| C(94)-C(44)-C(54)-C(64)     | -2.0(5)   |
| C(14)-C(44)-C(54)-C(64)     | -179.4(3) |
| C(44)-C(54)-C(64)-C(74)     | 0.0(5)    |
| C(54)-C(64)-C(74)-C(84)     | 1.3(5)    |
| C(64)-C(74)-C(84)-C(94)     | -0.6(5)   |
| C(74)-C(84)-C(94)-C(44)     | -1.5(5)   |
| C(54)-C(44)-C(94)-C(84)     | 2.7(5)    |
| C(14)-C(44)-C(94)-C(84)     | -179.8(3) |
| O(14)-C(34)-C(104)-C(154)   | 162.2(3)  |
| C(164)-C(34)-C(104)-C(154)  | 44.0(4)   |
| C(24)-C(34)-C(104)-C(154)   | -79.3(4)  |
| O(14)-C(34)-C(104)-C(114)   | -20.6(4)  |
| C(164)-C(34)-C(104)-C(114)  | -138.8(3) |
| C(24)-C(34)-C(104)-C(114)   | 97.9(3)   |
| C(154)-C(104)-C(114)-C(124) | 0.5(5)    |
| C(34)-C(104)-C(114)-C(124)  | -176.8(3) |
| C(104)-C(114)-C(124)-C(134) | -1.6(5)   |
| C(114)-C(124)-C(134)-C(144) | 1.2(5)    |
| C(124)-C(134)-C(144)-C(154) | 0.1(5)    |
| C(134)-C(144)-C(154)-C(104) | -1.2(5)   |
| C(114)-C(104)-C(154)-C(144) | 0.9(5)    |
| C(34)-C(104)-C(154)-C(144)  | 178.1(3)  |
| O(14)-C(34)-C(164)-C(174)   | -76.1(4)  |
| C(24)-C(34)-C(164)-C(174)   | 163.1(3)  |
| C(104)-C(34)-C(164)-C(174)  | 43.9(4)   |
| O(14)-C(34)-C(164)-C(214)   | 99.3(4)   |
| C(24)-C(34)-C(164)-C(214)   | -21.4(4)  |
| C(104)-C(34)-C(164)-C(214)  | -140.7(3) |
| C(214)-C(164)-C(174)-C(184) | 0.5(5)    |
| C(34)-C(164)-C(174)-C(184)  | 176.1(3)  |

|                             |           |
|-----------------------------|-----------|
| C(164)-C(174)-C(184)-C(194) | 0.0(6)    |
| C(174)-C(184)-C(194)-C(204) | -0.1(6)   |
| C(184)-C(194)-C(204)-C(214) | -0.3(6)   |
| C(174)-C(164)-C(214)-C(204) | -0.9(6)   |
| C(34)-C(164)-C(214)-C(204)  | -176.4(3) |
| C(194)-C(204)-C(214)-C(164) | 0.9(6)    |

---

## References

- <sup>1</sup> George, G. N. EXAFSPAK; Stanford Synchrotron Radiation Lightsource, Stanford Linear Accelerator Center; Stanford University: Stanford, CA, 2001.
- <sup>2</sup> Neese, F. *WIREs Comput. Mol. Sci.* **2012**, *2*, 73–78.
- <sup>3</sup> (a) Becke, A. D. *Phys. Rev. A* **1988**, *38*, 3098–3100. (b) Perdew, J. P. *Phys. Rev. B* **1986**, *33*, 8822–8824.
- <sup>4</sup> (a) Weigend, F.; Ahlrichs, R. *Phys. Chem. Chem. Phys.* **2005**, *7*, 3297–3305. (b) Pantazis, D. A.; Chen, X.-Y.; Landis, C. R.; Neese, F. *J. Chem. Theory Comput.* **2008**, *4*, 908–919. (c) van Lenthe, E.; van der Avoird, A.; Wormer, P. E. S. *J. Chem. Phys.* **1998**, *108*, 4783–4796.
- <sup>5</sup> van Wüllen, C. *J. Chem. Phys.* **1998**, *109*, 392–399.
- <sup>6</sup> Neese, F. *Inorg. Chim. Acta* **2002**, *337*, 181–192.
- <sup>7</sup> DeBeer George, S.; Petrenko, T.; Neese, F. *J. Phys. Chem. A* **2008**, *112*, 12936–12943.
- <sup>8</sup> (a) Becke, A.D. *J. Chem. Phys.* **1993**, *98*, 5648-5652. (b) Lee, C.; Yang, W.; Parr, R. G. *Phys. Rev. B* **1988**, *37*, 785-789.
- <sup>9</sup> Weigend, F.; Ahlrichs, R.. *Phys. Chem. Chem. Phys.* **2005**, *7*, 3297-3305.
- <sup>10</sup> Neese, F.; Wennmohs, F.; Hansen, A.; Becker, U. *Chem. Phys.* **2009**, *356*, 98-109.
- <sup>11</sup> Neese, F. *J. Chem. Phys.* **2003**, *119*, 9428-9443.
- <sup>12</sup> Neese, F. *J. Am. Chem. Soc.* **2006**, *128*, 10213-10222.
- <sup>13</sup> *APEX2*, version 2013.2-0; Bruker AXS: Madison, WI, 2013.
- <sup>14</sup> Sheldrick, G. M. *SADABS*, version 2012/1; University of Göttingen: Göttingen, Germany, 2012.
- <sup>15</sup> *SAINT*, version 8.27B; Bruker AXS: Madison, WI, 2013.
- <sup>16</sup> Burla, M. C.; Caliandro, R.; Camalli, M.; Carrozzini, B.; Cascarano, G. L.; Giacovazzo, C.; Mallamo, M.; Mazzone, A.; Polidori, G.; Spagna, R. *SIR2011: a new package for crystal structure determination and refinement*, version 1.0; Istituto di Cristallografia: Bari, Italy, 2012.
- <sup>17</sup> Sheldrick, G. M. *SHELXL-2013/4*, University of Göttingen: Göttingen, Germany, 2013.
